# Supplementary material for: Highly efficient asymmetric hydrogenation of cyano-substituted acrylate esters for synthesis of chiral γ-lactams and amino acids
Source: Royal Society of Chemistry journal article supplement (doi:10.1039/c5ob02422f), 2015-12-09
Supplement: c5ob02422f1.pdf [file c5ob02422f1.pdf]

*Supplementary Information for:*

Highly Efficient Asymmetric Hydrogenation of Cyano-substituted  
Acrylate Esters for Synthesis of Chiral  $\gamma$ -Lactams and Amino Acids

Duanyang Kong, Meina Li, Rui Wang, Guofu Zi, and Guohua Hou\*

Key Laboratory of Radiopharmaceuticals, College of Chemistry, Beijing Normal  
University, Beijing 100875, China

**Table of contents**

|                                                                                            |     |
|--------------------------------------------------------------------------------------------|-----|
| 1. General Information .....                                                               | S2  |
| 2. General procedure for the preparation of compounds <b>1</b> and <b>3</b> .....          | S2  |
| 3. General procedure for asymmetric hydrogenation of compounds <b>1</b> and <b>3</b> ..... | S3  |
| 4. General procedure for the synthesis of compounds <b>5</b> .....                         | S4  |
| 5. Characterization data for compounds <b>1</b> and <b>3</b> .....                         | S4  |
| 6. Characterization data for compounds <b>2</b> , <b>4</b> and <b>5</b> .....              | S10 |
| 7. Procedure for the synthesis of compound <b>6</b> and <b>7</b> .....                     | S19 |
| 8. Procedure for the synthesis of compound <b>8</b> and <b>9</b> .....                     | S20 |
| 9. NMR, GC and HPLC spectra of compounds <b>1-9</b> .....                                  | S22 |

## 1. General Information:

All the air or moisture sensitive reactions and manipulations were performed by using standard Schlenk techniques and in a nitrogen-filled glovebox. DME, THF, dioxane and toluene were distilled from sodium benzophenone ketyl.  $\text{CH}_2\text{Cl}_2$  was distilled from calcium hydride. Anhydrous MeOH was distilled from magnesium.  $^1\text{H}$  NMR and  $^{13}\text{C}$  NMR spectra were recorded on Bruker AV (400 MHz) spectrometers.  $\text{CDCl}_3$  was the solvent used for the NMR analysis, with TMS as the internal standard. Chemical shifts were reported upfield to TMS (0.00 ppm) for  $^1\text{H}$  NMR. Data is represented as follows: chemical shift, integration, multiplicity (s = singlet, d = doublet, dd = double of doublets, t = triplet, q = quartet, m = multiplet) and coupling constants ( $J$ ) in Hertz (Hz). Optical rotation was determined using a Perkin Elmer 241 MC polarimeter. GC analysis was conducted on an Agilent 7890A series instrument. HPLC analysis was conducted on Agilent 1260 series instrument. HRMS were recorded on a Waters LCT Premier XE mass spectrometer with APCI or ESI.

## 2. General procedure for the preparation of compounds 1 and 3.

### General Procedure for the synthesis of compounds 1: <sup>[1]</sup>

The appropriate  $\alpha$ -keto esters (0.02 mmol) and 2-(triphenylphosphoranylidene)-acetonitrile (0.024 mmol) were dissolved in toluene (30 ml) in a round bottle flask equipped with a reflux condenser. The mixture was heated to reflux for 4-8h after which the solvent was removed in vacuo. The residue was purified by silica gel column chromatography, using petroleum ether with increasing percentage of AcOEt or  $\text{Et}_2\text{O}$  as an eluent, in order to separate (*E*)- and (*Z*)-stereoisomers.

### General Procedure for the synthesis of compounds 3:

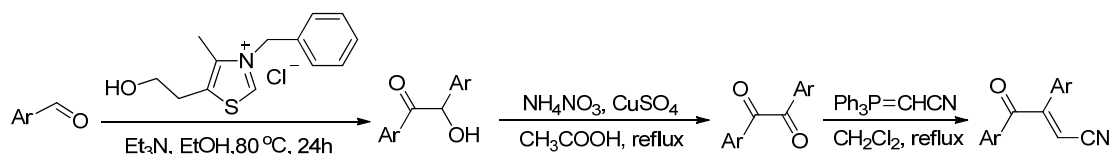

An 100 mL Schlenk tube equipped with a magnetic stir bar was charged with aromatic

---

aldehyde (30 mmol) and 3-benzyl-5-(2-hydroxyethyl)-4-methylthiazolium chloride (1.5 mmol) in 20 mL of ethanol, and then sealed tightly with a rubber septum. The tube was evacuated and backfilled with argon three times. Et<sub>3</sub>N (9 mmol) was added via a syringe. The mixture was stirred for 24 h at 80 °C under N<sub>2</sub>. After the reaction was completed, the mixture was concentrated and extracted with ethyl acetate, washed with water and brine, and then dried with anhydrous Na<sub>2</sub>SO<sub>4</sub>. The solvent was removed under reduced pressure. The residue was used directly in next step without further purification. [2]

An 50 mL round-bottom flask equipped with a magnetic stir bar was charged with the resulting crude product, glacial acetic acid (20 mL), NH<sub>4</sub>NO<sub>3</sub> (37.5 mmol) and 2% aqueous solution of CuSO<sub>4</sub> (3.75 mL). The resulting mixture was stirred at reflux until no materials was detected by TLC, and then poured into ice water. The precipitated product was filtered, washed with cold water, dried and recrystallization from ethanol to afford the corresponding benzil.

The appropriate benzil (0.02 mol) and 2-(triphenylphosphoranylidene)-acetonitrile (0.024 mol) were dissolved in CH<sub>2</sub>Cl<sub>2</sub> (30 ml) in a round bottle flask equipped with a reflux condenser. The solution was stirred at reflux temperature until no starting material was detected by TLC. After the solvent was removed in vacuo, the residue was purified by silica gel column chromatography using petroleum ether/ AcOEt as an eluent.

### **3. General procedure for asymmetric hydrogenation of compounds 1 and 3.**

A stock solution was made by mixing Rh(COD)<sub>2</sub>BF<sub>4</sub> or [Rh(COD)Cl]<sub>2</sub> with (*S,S*)-f-spiroPhos in a 1:1.1 molar ratio of Rh/(*S,S*)-f-spiroPhos in CH<sub>2</sub>Cl<sub>2</sub> at room temperature for 20 min in a nitrogen-filled glovebox. An aliquot of the catalyst solution (1.0 mL, 0.001 mmol) was transferred by syringe into the vials charged with different substrates (0.1 mmol for each) in anhydrous CH<sub>2</sub>Cl<sub>2</sub> (2.0 mL). The vials were then placed into a steel autoclave. The inert atmosphere was replaced by H<sub>2</sub> and the reaction mixture was stirred under H<sub>2</sub> (30 atm) at 40 °C for 8 h. The hydrogen gas was released slowly and carefully. The solution was concentrated and passed through

a short column of silica gel to remove the metal complex. The ee values of all products were determined by GC or HPLC analysis on a chiral stationary phase.

#### 4. General procedure for the synthesis of compounds 5.

To a stirring solution of the hydrogenation product **4** (0.1 mmol) in MeOH (3 mL) NaBH<sub>4</sub> (0.2 mmol) was added portionwise at 0 °C. The mixture was stirred at 0 °C until no starting material was detected by TLC and carefully quenched with H<sub>2</sub>O. The aqueous layer was extracted with ethyl acetate, dried over MgSO<sub>4</sub>. The solvent was removed under reduced pressure. Diastereomeric ratios were determined by <sup>1</sup>H NMR of crude products. The ee values of all products were determined by HPLC analysis on a chiral stationary phase.

#### 5. Characterization data for compounds 1 and 3.

**methyl 3-cyano-2-phenylacrylate: 1a** (*Z*): colorless liquid; Yield: 33%; <sup>1</sup>H NMR

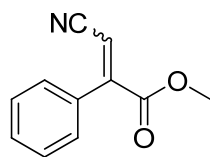

(CDCl<sub>3</sub>, 400 MHz)  $\delta$ : 7.48-7.42 (m, 5H), 5.94 (s, 1H), 3.97 (s, 3H).

**1a'** (*E*): white solid; MP: 52-54°C; Yield: 59%; <sup>1</sup>H NMR (CDCl<sub>3</sub>, 400 MHz)  $\delta$ : 7.50-7.45 (m, 5H), 6.53 (s, 1H), 3.86 (s, 3H).<sup>[1]</sup>

**ethyl 3-cyano-2-phenylacrylate: 1b** (*Z*): yellow liquid; Yield: 28%; <sup>1</sup>H NMR (CDCl<sub>3</sub>,

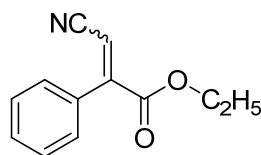

400 MHz)  $\delta$ : 7.46-7.40 (m, 5H), 5.92 (s, 1H), 4.45 (q, *J* = 7.2 Hz, 2H), 1.42 (t, *J* = 7.2 Hz, 3H). <sup>13</sup>C NMR (CDCl<sub>3</sub>, 100 MHz)  $\delta$ : 164.8, 152.7, 133.1, 131.0, 128.9, 127.5, 115.6, 101.1, 62.6,

13.9. **1b'** (*E*): yellow liquid; Yield: 56%; <sup>1</sup>H NMR (CDCl<sub>3</sub>, 400 MHz)  $\delta$ : 7.51-7.45 (m, 5H), 6.51 (s, 1H), 4.33 (q, *J* = 7.1 Hz, 2H), 1.33 (t, *J* = 7.1 Hz, 3H). <sup>13</sup>C NMR (CDCl<sub>3</sub>, 100 MHz)  $\delta$ : 164.5, 151.7, 132.4, 130.3, 129.2, 128.4, 115.9, 107.1, 62.6, 14.0.<sup>[3]</sup>

**methyl 3-cyano-2-(*p*-tolyl)acrylate: 1c** (*Z*): colorless liquid; Yield: 30%; <sup>1</sup>H NMR

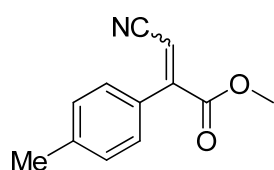

(CDCl<sub>3</sub>, 400 MHz)  $\delta$ : 7.15 (d, *J* = 8.2 Hz, 2H), 7.03 (d, *J* = 8.0 Hz, 2H), 5.72 (s, 1H), 3.76 (s, 3H), 2.20 (s, 3H). <sup>13</sup>C NMR (CDCl<sub>3</sub>, 100 MHz)  $\delta$ : 165.5, 152.6, 141.7, 130.1, 129.7, 127.4,

115.8, 100.0, 53.0, 21.3. **1c'** (*E*): white solid; MP: 55-57°C; Yield: 64%; <sup>1</sup>H NMR (CDCl<sub>3</sub>, 400 MHz)  $\delta$ : 7.29 (d, *J* = 8.2 Hz, 2H), 7.13 (d, *J* = 8.0 Hz, 2H), 6.33 (s, 1H),

3.69 (s, 3H), 2.26 (s, 3H).  $^{13}\text{C}$  NMR ( $\text{CDCl}_3$ , 100 MHz)  $\delta$ : 165.2, 151.5, 140.8, 129.4, 129.2, 129.1, 116.0, 106.5, 53.2, 21.4. APCI-HRMS Calcd. for  $\text{C}_{12}\text{H}_{12}\text{NO}_2$  [ $\text{M}+\text{H}^+$ ]: 202.0868, found 202.0869.

**methyl 3-cyano-2-(4-methoxyphenyl)acrylate: 1d** (*Z*): yellow liquid; Yield: 24%;

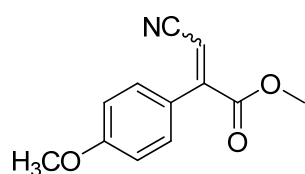

$^1\text{H}$  NMR ( $\text{CDCl}_3$ , 400 MHz)  $\delta$ : 7.39 (dd,  $J = 6.8$  Hz, 2.1 Hz, 2H), 6.91 (dd,  $J = 6.8$  Hz, 2.1 Hz, 2H), 5.83 (s, 1H), 3.96 (s, 3H), 3.84 (s, 3H).  $^{13}\text{C}$  NMR ( $\text{CDCl}_3$ , 100 MHz)  $\delta$ : 165.7, 162.0, 152.2, 129.1, 125.1, 116.0, 114.4, 98.2, 55.5, 53.0.

**1d'** (*E*): yellow solid; MP: 62-64°C; Yield: 56%;  $^1\text{H}$  NMR ( $\text{CDCl}_3$ , 400 MHz)  $\delta$ : 7.49 (dd,  $J = 6.8$  Hz, 2.1 Hz, 2H), 6.97 (dd,  $J = 6.8$  Hz, 2.2 Hz, 2H), 6.40 (s, 1H), 3.86 (s, 3H), 3.85 (s, 3H).  $^{13}\text{C}$  NMR ( $\text{CDCl}_3$ , 100 MHz)  $\delta$ : 165.5, 161.3, 150.9, 130.9, 124.4, 116.3, 113.9, 105.1, 55.4, 53.3. APCI-HRMS Calcd. for  $\text{C}_{12}\text{H}_{12}\text{NO}_3$  [ $\text{M}+\text{H}^+$ ]: 218.0817, found 218.0819.

**methyl 3-cyano-2-(4-fluorophenyl)acrylate: 1e** (*Z*): yellow liquid; Yield: 32%;  $^1\text{H}$

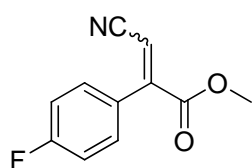

NMR ( $\text{CDCl}_3$ , 400 MHz)  $\delta$ : 7.46-7.42 (m, 2H), 7.10 (t,  $J = 8.6$  Hz, 2H), 5.91 (s, 1H), 3.96 (s, 3H).  $^{13}\text{C}$  NMR ( $\text{CDCl}_3$ , 100 MHz)  $\delta$ : 164.9, 164.2 (d,  $J = 251.0$  Hz), 151.2, 129.9 (d,  $J = 9.0$  Hz),

129.4 (d,  $J = 4.0$  Hz), 116.1 (d,  $J = 22.0$  Hz), 115.5, 102.1, 53.1. **1e'** (*E*): white solid; MP: 62-64°C; Yield: 47%;  $^1\text{H}$  NMR ( $\text{CDCl}_3$ , 400 MHz)  $\delta$ : 7.51-7.48 (m, 2H), 7.17-7.13 (m, 2H), 6.53 (s, 1H), 3.86 (s, 3H).  $^{13}\text{C}$  NMR ( $\text{CDCl}_3$ , 100 MHz)  $\delta$ : 165.0, 164.8, 162.5, 150.3, 131.4 (d,  $J = 9.0$  Hz), 128.2 (d,  $J = 4.0$  Hz), 115.7 (d,  $J = 22.0$  Hz), 107.5, 53.4. APCI-HRMS Calcd. for  $\text{C}_{11}\text{H}_9\text{NO}_2\text{F}$  [ $\text{M}+\text{H}^+$ ]: 206.0617, found 206.0617.

**methyl 2-(4-chlorophenyl)-3-cyanoacrylate: 1f** (*Z*): white solid; MP: 58-60°C; Yield:

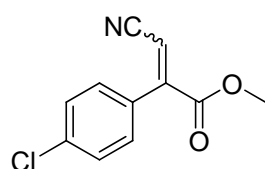

33%;  $^1\text{H}$  NMR ( $\text{CDCl}_3$ , 400 MHz)  $\delta$ : 7.41-7.36 (m, 4H), 5.94 (s, 1H), 3.97 (s, 3H).  $^{13}\text{C}$  NMR ( $\text{CDCl}_3$ , 100 MHz)  $\delta$ : 164.7, 151.2, 137.2, 131.7, 129.2, 129.1, 115.3, 102.8, 53.3. **1f'** (*E*):

white solid; MP: 55-58°C; Yield: 51%;  $^1\text{H}$  NMR ( $\text{CDCl}_3$ , 400 MHz)  $\delta$ : 7.37 (s, 4H), 6.48 (s, 1H), 3.80 (s, 3H).  $^{13}\text{C}$  NMR ( $\text{CDCl}_3$ , 100 MHz)  $\delta$ : 164.6, 150.2, 136.6, 130.6, 130.5, 128.8, 115.5, 107.9, 53.4. APCI-HRMS Calcd. for  $\text{C}_{11}\text{H}_9\text{NO}_2\text{Cl}$  [ $\text{M}+\text{H}^+$ ]:

222.0322, found 222.0323.

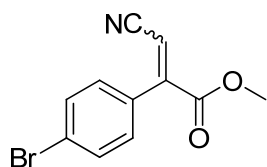

**methyl 2-(4-bromophenyl)-3-cyanoacrylate: 1g** (*Z*): white solid; MP: 62-64°C; Yield: 37%; <sup>1</sup>H NMR (CDCl<sub>3</sub>, 400 MHz) δ: 7.54 (t, *J* = 2.4 Hz, 2H), 7.32-7.29 (m, 2H), 5.95 (s, 1H), 3.96 (s, 3H). <sup>13</sup>C NMR (CDCl<sub>3</sub>, 100 MHz) δ: 164.6, 151.2,

132.1, 129.3, 125.6, 115.3, 102.9, 53.3. **1g'** (*E*): white solid; MP: 74-77°C; Yield: 48%; <sup>1</sup>H NMR (CDCl<sub>3</sub>, 400 MHz) δ: 7.41-7.36 (m, 4H), 5.94 (s, 1H), 3.97 (s, 3H). <sup>13</sup>C NMR (CDCl<sub>3</sub>, 100 MHz) δ: 164.5, 150.4, 131.8, 130.9, 130.7, 125.1, 115.5, 107.9, 53.5. APCI-HRMS Calcd. for C<sub>11</sub>H<sub>9</sub>NO<sub>2</sub>Br [M+H<sup>+</sup>]: 265.9817, found 265.9818.

**methyl 3-cyano-2-(*m*-tolyl)acrylate: 1h** (*Z*): colorless liquid; Yield: 32%; <sup>1</sup>H NMR

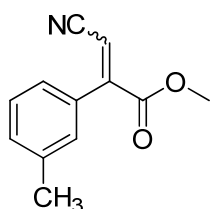

(CDCl<sub>3</sub>, 400 MHz) δ: 7.26-7.16 (m, 4H), 5.85 (s, 1H), 3.90 (s, 3H), 2.31 (s, 3H). <sup>13</sup>C NMR (CDCl<sub>3</sub>, 100 MHz) δ: 165.4, 152.9, 138.8, 133.0, 131.9, 128.9, 128.1, 124.7, 115.6, 101.2, 53.1, 21.3.

**1h'** (*E*): white solid; MP: 68-70°C; Yield: 57%; <sup>1</sup>H NMR (CDCl<sub>3</sub>, 400 MHz) δ: 7.28-7.18 (m, 4H), 6.41 (s, 1H), 3.76 (s, 3H), 2.31 (s, 3H). <sup>13</sup>C NMR (CDCl<sub>3</sub>, 100 MHz) δ: 165.1, 151.6, 138.2, 132.2, 131.2, 129.6, 128.4, 126.2, 115.8, 107.2, 53.2, 21.3. APCI-HRMS Calcd. for C<sub>12</sub>H<sub>12</sub>NO<sub>2</sub> [M+H<sup>+</sup>]: 202.0868, found 202.0869.

**methyl 3-cyano-2-(3-methoxyphenyl)acrylate: 1i** (*Z*): white solid; MP: 69-71°C;

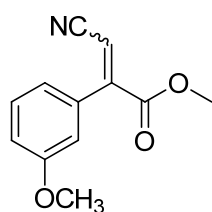

Yield: 39%; <sup>1</sup>H NMR (CDCl<sub>3</sub>, 400 MHz) δ: 7.23 (t, *J* = 8.0 Hz, 1H), 6.91-6.84 (m, 3H), 5.84 (s, 1H), 3.85 (s, 3H), 3.72 (s, 3H). <sup>13</sup>C NMR (CDCl<sub>3</sub>, 100 MHz) δ: 165.1, 159.8, 152.6, 134.4, 130.0, 120.0, 116.4, 115.5, 113.2, 101.9, 55.4, 53.1. **1i'** (*E*): colorless

liquid; Yield: 43%; <sup>1</sup>H NMR (CDCl<sub>3</sub>, 400 MHz) δ: 7.29-7.25 (m, 1H), 6.97-6.90 (m, 3H), 6.42 (s, 1H), 3.75 (s, 3H), 3.73 (s, 3H). <sup>13</sup>C NMR (CDCl<sub>3</sub>, 100 MHz) δ: 165.0, 159.4, 151.4, 133.3, 129.6, 121.4, 116.2, 115.7, 114.5, 107.5, 55.4, 53.3. APCI-HRMS Calcd. for C<sub>12</sub>H<sub>12</sub>NO<sub>3</sub> [M+H<sup>+</sup>]: 218.0817, found 218.0819.

**methyl 3-cyano-2-(3-fluorophenyl)acrylate: 1j** (*Z*): white solid; MP: 42-44°C; Yield: 28%; <sup>1</sup>H NMR (CDCl<sub>3</sub>, 400 MHz) δ: 7.36-7.30 (m, 1H), 7.19-7.08 (m, 3H), 5.90 (s, 1H), 3.90 (s, 3H). <sup>13</sup>C NMR (CDCl<sub>3</sub>, 100 MHz) δ: 163.5, 161.5 (d, *J* = 246.0 Hz),

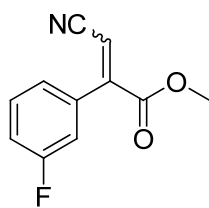

150.0 (d,  $J = 3.0$  Hz), 134.2 (d,  $J = 8.0$  Hz), 129.6 (d,  $J = 8.0$  Hz), 122.5 (d,  $J = 3.0$  Hz), 116.8 (d,  $J = 27.0$  Hz), 714.1, 113.8 (d,  $J = 23.0$  Hz), 102.6, 52.2. **1j'** (*E*): colorless liquid; Yield: 50%;  $^1\text{H}$  NMR ( $\text{CDCl}_3$ , 400 MHz)  $\delta$ : 7.21-7.08 (m, 4H), 6.51 (s, 1H), 3.80 (s, 3H).  $^{13}\text{C}$  NMR ( $\text{CDCl}_3$ , 100 MHz)  $\delta$ : 164.3, 162.2 (d,  $J = 245.0$  Hz), 150.0 (d,  $J = 2.0$  Hz), 134.2 (d,  $J = 8.0$  Hz), 130.2 (d,  $J = 8.0$  Hz), 125.0 (d,  $J = 3.0$  Hz), 117.2 (d,  $J = 21.0$  Hz), 116.3 (d,  $J = 23.0$  Hz), 115.4, 108.6, 53.3. APCI-HRMS Calcd. for  $\text{C}_{11}\text{H}_9\text{NO}_2\text{F}$  [ $\text{M}+\text{H}^+$ ]: 206.0617, found 206.0617.

**methyl 3-cyano-2-(*o*-tolyl)acrylate: 1k** (*Z*): white solid; MP: 56-58°C; Yield: 34%;

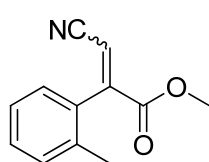

$^1\text{H}$  NMR ( $\text{CDCl}_3$ , 400 MHz)  $\delta$ : 7.28-7.06 (m, 4H), 5.73 (s, 1H), 3.80 (s, 3H), 2.14 (s, 3H).  $^{13}\text{C}$  NMR ( $\text{CDCl}_3$ , 100 MHz)  $\delta$ : 164.4, 153.0, 136.0, 134.5, 130.6, 130.1, 129.0, 126.2, 115.0, 107.1, 53.1, 19.8. **1k'** (*E*): colorless liquid; Yield: 48%;  $^1\text{H}$  NMR ( $\text{CDCl}_3$ , 400 MHz)  $\delta$ : 7.28-7.11 (m, 4H), 6.56 (s, 1H), 3.74 (s, 3H), 2.13 (s, 3H).  $^{13}\text{C}$  NMR ( $\text{CDCl}_3$ , 100 MHz)  $\delta$ : 164.8, 152.7, 136.0, 132.5, 130.5, 130.0, 128.9, 126.1, 115.2, 109.8, 53.3, 19.6. APCI-HRMS Calcd. for  $\text{C}_{12}\text{H}_{12}\text{NO}_2$  [ $\text{M}+\text{H}^+$ ]: 202.0868, found 202.0869.

**methyl 3-cyano-2-(2-methoxyphenyl)acrylate: 1l** (*Z*): white solid; MP: 58-60°C;

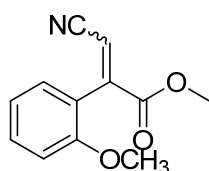

Yield: 13%;  $^1\text{H}$  NMR ( $\text{CDCl}_3$ , 400 MHz)  $\delta$ : 7.39-7.35 (m, 1H), 7.19-7.16 (m, 1H), 6.94 (t,  $J = 7.5$  Hz, 1H), 6.86 (d,  $J = 8.0$  Hz, 1H), 5.83 (s, 1H), 3.82 (s, 3H), 3.75 (s, 3H),  $^{13}\text{C}$  NMR ( $\text{CDCl}_3$ , 100 MHz)  $\delta$ : 165.5, 157.0, 151.2, 132.5, 129.5, 123.7, 121.1, 115.6, 111.5, 103.0, 55.9, 52.7. **1l'** (*E*): white solid; MP: 43-44°C; Yield: 70%;  $^1\text{H}$  NMR ( $\text{CDCl}_3$ , 400 MHz)  $\delta$ : 7.43-7.38 (m, 2H), 7.04-7.00 (m, 1H), 6.94 (d,  $J = 8.3$  Hz, 1H), 6.42 (s, 1H), 3.75 (d,  $J = 3.8$  Hz, 6H).  $^{13}\text{C}$  NMR ( $\text{CDCl}_3$ , 100 MHz)  $\delta$ : 165.5, 157.0, 150.4, 132.0, 130.2, 122.2, 120.8, 115.7, 111.3, 107.4, 55.7, 53.0. APCI-HRMS Calcd. for  $\text{C}_{12}\text{H}_{12}\text{NO}_3$  [ $\text{M}+\text{H}^+$ ]: 218.0817, found 218.0819.

**methyl 3-cyano-2-(naphthalen-1-yl)acrylate: 1m** (*Z*): yellow solid; MP: 128-130°C; Yield: 31%;  $^1\text{H}$  NMR ( $\text{CDCl}_3$ , 400 MHz)  $\delta$ : 7.92-7.89 (m, 2H), 7.67-7.26 (m, 5H), 6.00 (s, 1H), 3.84 (s, 3H).  $^{13}\text{C}$  NMR ( $\text{CDCl}_3$ , 100 MHz)  $\delta$ : 164.8, 152.3, 133.4, 132.5, 130.8, 130.6, 128.8, 127.3, 127.2, 126.6, 125.2, 124.3, 115.0, 108.0, 53.2. **1m'** (*E*):

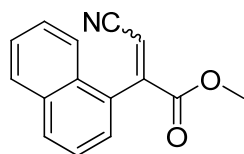

yellow liquid; Yield: 46%;  $^1\text{H}$  NMR ( $\text{CDCl}_3$ , 400 MHz)  $\delta$ : 7.97-7.90 (m, 2H), 7.57-7.47 (m, 5H), 6.83 (s, 1H), 3.76 (s, 3H).  $^{13}\text{C}$  NMR ( $\text{CDCl}_3$ , 100 MHz)  $\delta$ : 165.3, 152.1, 133.5, 131.0, 130.6, 130.5, 128.9, 127.5, 127.1, 126.6, 125.3, 124.4, 115.3, 110.9, 53.3. APCI-HRMS Calcd. for  $\text{C}_{15}\text{H}_{12}\text{NO}_2$  [ $\text{M}+\text{H}^+$ ]: 238.0868, found 238.0870.

**methyl 3-cyano-2-(naphthalen-2-yl)acrylate: 1n** (*Z*): yellow solid; MP: 116-118°C;

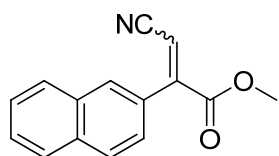

Yield: 32%;  $^1\text{H}$  NMR ( $\text{CDCl}_3$ , 400 MHz)  $\delta$ : 7.80-7.72 (m, 4H), 7.47-7.34 (m, 3H), 5.91 (s, 1H), 3.9 (s, 3H).  $^{13}\text{C}$  NMR ( $\text{CDCl}_3$ , 100 MHz)  $\delta$ : 165.4, 152.7, 134.2, 132.8, 130.3, 128.9, 128.4, 128.0, 127.8, 127.2, 123.6, 115.7, 101.4, 53.3.

**1n'** (*E*): yellow solid; MP: 104-106°C; Yield: 37%;  $^1\text{H}$  NMR ( $\text{CDCl}_3$ , 400 MHz)  $\delta$ : 7.92-7.75 (m, 4H), 7.47-7.41 (m, 3H), 6.49 (s, 1H), 3.76 (s, 3H).  $^{13}\text{C}$  NMR ( $\text{CDCl}_3$ , 100 MHz)  $\delta$ : 165.2, 151.5, 133.9, 132.7, 129.6, 129.5, 128.7, 128.3, 127.8, 127.7, 126.8, 125.7, 115.9, 107.5, 53.4. APCI-HRMS Calcd. for  $\text{C}_{15}\text{H}_{12}\text{NO}_2$  [ $\text{M}+\text{H}^+$ ]: 238.0868, found 238.0870.

**methyl 2-(cyanomethylene)-3-methylbutanoate: 1o** (*Z*): colorless liquid; Yield:

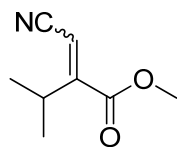

34%;  $^1\text{H}$  NMR ( $\text{CDCl}_3$ , 400 MHz)  $\delta$ : 5.58 (d,  $J = 1.4$  Hz, 1H), 3.86 (s, 3H), 2.93-2.86 (m, 1H), 1.11 (s, 3H), 1.09 (s, 3H). **1o'** (*E*): yellow liquid; Yield: 38%;  $^1\text{H}$  NMR ( $\text{CDCl}_3$ , 400 MHz)  $\delta$ : 6.12 (s, 1H), 3.75 (s, 3H), 3.19-3.12 (m, 1H), 1.23 (s, 3H), 1.21 (s, 3H).<sup>[1]</sup>

**methyl 3-cyano-2-cyclohexylacrylate: 1p** (*Z*): colorless liquid; Yield: 35%;  $^1\text{H}$  NMR

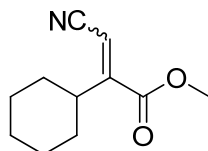

( $\text{CDCl}_3$ , 400 MHz)  $\delta$ : 5.50 (s, 1H), 3.81 (s, 3H), 2.52-2.46 (m, 1H), 1.76-1.64 (m, 5H), 1.32-1.02 (m, 5H).  $^{13}\text{C}$  NMR ( $\text{CDCl}_3$ , 100 MHz)  $\delta$ : 165.3, 159.4, 115.6, 101.5, 52.6, 41.1, 31.4, 26.0, 25.6. **1p'** (*E*): white solid; MP: 38-40°C; Yield: 27%;  $^1\text{H}$  NMR ( $\text{CDCl}_3$ , 400 MHz)  $\delta$ : 6.11 (s, 1H), 3.74 (s, 3H), 2.81-2.74 (m, 1H), 1.78-1.60 (m, 7H), 1.32-1.17 (m, 3H).  $^{13}\text{C}$  NMR ( $\text{CDCl}_3$ , 100 MHz)  $\delta$ : 165.3, 158.4, 115.4, 105.5, 52.6, 42.3, 30.3, 26.2, 25.4. APCI-HRMS Calcd. for  $\text{C}_{11}\text{H}_{16}\text{NO}_2$  [ $\text{M}+\text{H}^+$ ]: 194.1181, found 194.1182.<sup>[1]</sup>

**(E)-4-oxo-3,4-diphenylbut-2-enenitrile (3a)**: yellow liquid; Yield: 88%;  $^1\text{H}$  NMR ( $\text{CDCl}_3$ , 400 MHz)  $\delta$ : 7.76-7.74 (m, 2H), 7.55-7.50 (m, 3H), 7.48-7.34 (m, 5H), 5.69



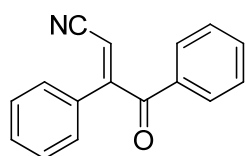

(s, 1H).  $^{13}\text{C}$  NMR ( $\text{CDCl}_3$ , 100 MHz)  $\delta$ : 194.1, 159.3, 135.0, 134.4, 133.1, 130.9, 130.1, 129.1, 128.9, 128.2, 116.1, 100.4.

**(E)-3,4-bis(2-methoxyphenyl)-4-oxobut-2-enitrile (3b)**: yellow solid; MP:

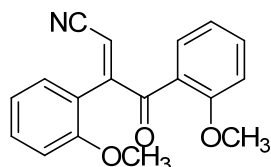

123-125°C; Yield: 87%;  $^1\text{H}$  NMR ( $\text{CDCl}_3$ , 400 MHz)  $\delta$ : 7.57 (dd,  $J = 7.6$  Hz, 1.6 Hz, 2H), 7.53-7.29 (m, 2H), 7.02-6.92 (m, 2H), 6.73-6.69 (m, 2H), 6.09 (s, 1H), 3.64 (s, 3H), 358 (s, 3H).  $^{13}\text{C}$  NMR ( $\text{CDCl}_3$ , 100 MHz)  $\delta$ : 194.1, 158.8, 157.6,

156.6, 133.4, 131.8, 130.9, 130.7, 127.0, 123.0, 120.4, 120.3, 116.7, 110.8, 110.7, 103.6, 55.2, 55.1.

**(E)-4-oxo-3,4-di-*m*-tolylbut-2-enitrile (3c)**: yellow liquid; Yield: 82%;  $^1\text{H}$  NMR ( $\text{CDCl}_3$ , 400 MHz)  $\delta$ : 7.72 (s, 1H), 7.63 (d,  $J = 7.7$  Hz, 1H), 7.47-7.25 (m, 6H), 5.71

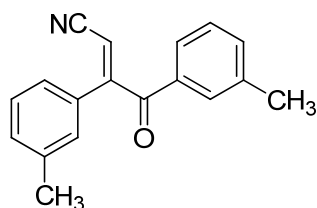

(s, 1H), 2.39 (s, 3H), 2.37 (s, 3H).  $^{13}\text{C}$  NMR ( $\text{CDCl}_3$ , 100 MHz)  $\delta$ : 194.4, 159.7, 138.9, 138.8, 135.2, 135.1, 133.0, 131.7, 130.4, 129.0, 128.7, 128.6, 127.6, 125.4, 116.1, 99.7, 21.4, 21.3.

**(E)-4-oxo-3,4-di-*p*-tolylbut-2-enitrile (3d)**: yellow liquid; Yield: 67%;  $^1\text{H}$  NMR

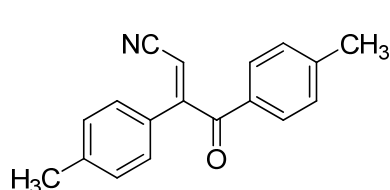

( $\text{CDCl}_3$ , 400 MHz)  $\delta$ : 7.75 (d,  $J = 8.0$  Hz, 2H), 7.55 (d,  $J = 8.0$  Hz, 2H), 7.24 (d,  $J = 8.0$  Hz, 4H), 5.67 (s, 1H), 2.40 (s, 3H), 2.37 (s, 3H).  $^{13}\text{C}$  NMR ( $\text{CDCl}_3$ , 100 MHz)  $\delta$ : 194.0, 159.6, 145.5, 141.5, 132.5, 130.3,

130.2, 129.8, 129.6, 128.2, 116.4, 98.5, 21.8, 21.5.

**(E)-3,4-bis(4-methoxyphenyl)-4-oxobut-2-enitrile (3e)**: yellow liquid; Yield:

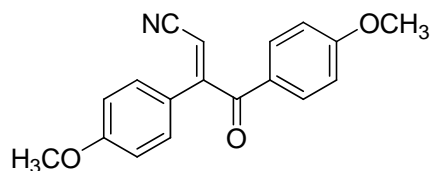

82%;  $^1\text{H}$  NMR ( $\text{CDCl}_3$ , 400 MHz)  $\delta$ : 7.84-7.81 (m, 2H), 7.65-7.61 (m, 2H), 6.95-6.88 (m, 4H), 5.55 (s, 1H), 3.85 (s, 3H), 3.82 (s, 3H).  $^{13}\text{C}$  NMR ( $\text{CDCl}_3$ ,

100 MHz)  $\delta$ : 193.1, 164.5, 161.6, 159.2, 132.6, 130.0, 127.9, 125.6, 116.8, 114.5, 114.2, 96.1, 55.6, 55.4.

## 6. Characterization data for compounds 2, 4 and 5.

**methyl 3-cyano-2-phenylpropanoate:** white solid; MP: 58-60°C; (*R*)-**2a**: Yield: 98%;

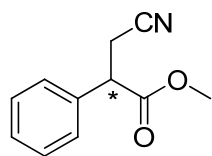

98% ee;  $[\alpha]_D^{25} = -138.0$  ( $c = 0.5$ ,  $\text{CHCl}_3$ ); HPLC condition: Lux 5u Cellulose-3 (250 × 4.60mm), ipa : hex = 20:80, 1mL/min, 225 nm;  $t_R = 15.9$  min (major),  $t_R = 22.4$  min (minor). (*S*)-**2a'**: Yield: 98%;

97% ee;  $[\alpha]_D^{25} = +132.6$  ( $c = 0.5$ ,  $\text{CHCl}_3$ ); HPLC condition: Lux 5u Cellulose-3 (250 × 4.60mm), ipa : hex = 20:80, 1mL/min, 225 nm;  $t_R = 17.3$  min (minor),  $t_R = 27.1$  min (major).  $^1\text{H}$  NMR ( $\text{CDCl}_3$ , 400 MHz)  $\delta$ : 7.32-7.18 (m, 5H), 3.87 (t,  $J = 7.2$  Hz, 1H), 3.64 (s, 3H), 2.95 (q,  $J = 7.6$  Hz, 1H), 2.73 (q,  $J = 7.3$  Hz, 1H).<sup>[1]</sup> The absolute configuration of (*R*)-**2a** and (*S*)-**2a'** was determined by comparison with optical rotation data for the reported literature.<sup>[1]</sup>

**ethyl 3-cyano-2-phenylpropanoate:** colorless liquid; **2b**: Yield: 97%; 96% ee;  $[\alpha]_D^{25} = -106.4$  ( $c = 0.5$ ,  $\text{CHCl}_3$ ); HPLC condition: Lux 5u Cellulose-3 (250 × 4.60mm), ipa : hex = 30:70, 1mL/min, 225 nm;  $t_R = 9.2$  min (major),  $t_R = 10.9$  min (minor). **2b'**: Yield: 98%; 97% ee;  $[\alpha]_D^{25} = +121.6$  ( $c = 0.5$ ,  $\text{CHCl}_3$ ); HPLC condition: Lux 5u

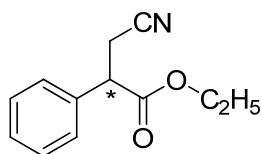

Cellulose-3 (250 × 4.60mm), ipa : hex = 30:70, 1mL/min, 225 nm;  $t_R = 17.3$  min (minor),  $t_R = 27.1$  min (major).  $^1\text{H}$  NMR ( $\text{CDCl}_3$ , 400 MHz)  $\delta$ : 7.30-7.18 (m, 5H), 4.16-4.64 (m, 2H), 3.84 (t,  $J = 7.6$  Hz, 1H), 2.94 (dd,  $J = 16.8$  Hz, 7.6 Hz,

1H), 2.71 (dd,  $J = 16.8$  Hz, 7.6 Hz, 1H), 1.13 (t,  $J = 7.1$  Hz, 3H).  $^{13}\text{C}$  NMR ( $\text{CDCl}_3$ , 100 MHz)  $\delta$ : 171.0, 136.0, 129.2, 128.5, 127.5, 117.7, 61.8, 47.7, 21.7, 14.0. APCI-HRMS Calcd. for  $\text{C}_{12}\text{H}_{14}\text{NO}_2$   $[\text{M}+\text{H}^+]$ : 204.1025, found 204.1026.

**methyl 3-cyano-2-(*p*-tolyl)propanoate:** white solid; MP: 55-57°C; **2c**: Yield: 97%; 96% ee;  $[\alpha]_D^{25} = -134.6$  ( $c = 0.5$ ,  $\text{CHCl}_3$ ); HPLC condition:

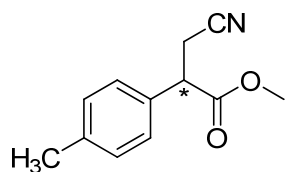

Lux 5u Cellulose-3 (250 × 4.60mm), ipa : hex = 30:70, 1mL/min, 225 nm;  $t_R = 10.3$  min (major),  $t_R = 14.0$  min (minor). **2c'**: Yield: 96%; 97% ee;  $[\alpha]_D^{25} = +135.2$  ( $c = 0.5$ ,

$\text{CHCl}_3$ ); HPLC condition: Lux 5u Cellulose-3 (250 × 4.60mm), ipa : hex = 30:70, 1mL/min, 225 nm;  $t_R = 9.6$  min (minor),  $t_R = 12.5$  min (major).  $^1\text{H}$  NMR ( $\text{CDCl}_3$ , 400 MHz)  $\delta$ : 7.11-7.06 (m, 4H), 3.82 (t,  $J = 7.6$  Hz, 1H), 3.62 (s, 3H), 2.92 (dd,  $J = 16.8$

Hz, 7.5 Hz, 1H), 2.70 (dd,  $J = 16.8$  Hz, 7.7 Hz, 1H), 2.25 (s, 3H).  $^{13}\text{C}$  NMR ( $\text{CDCl}_3$ , 100 MHz)  $\delta$ : 171.7, 138.4, 132.8, 129.9, 127.4, 117.7, 52.8, 47.2, 21.8, 21.1. APCI-HRMS Calcd. for  $\text{C}_{12}\text{H}_{14}\text{NO}_2$  [ $\text{M}+\text{H}^+$ ]: 204.1025, found 204.1029.

**methyl 3-cyano-2-(4-methoxyphenyl)propanoate**: white solid; MP: 60-62°C; **2d**:

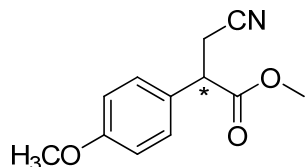

Yield: 96%; 97% ee;  $[\alpha]_{\text{D}}^{25} = -147.4$  ( $c = 0.5$ ,  $\text{CHCl}_3$ ); HPLC condition: Lux 5u Cellulose-3 (250  $\times$  4.60mm), ipa : hex = 30:70, 1mL/min, 225 nm;  $t_{\text{R}} = 15.4$  min (major),  $t_{\text{R}} = 17.5$  min (minor). **2d'**: Yield: 96%; 97% ee;  $[\alpha]_{\text{D}}^{25} = +149.4$  ( $c = 0.5$ ,  $\text{CHCl}_3$ ); HPLC condition: Lux 5u Cellulose-3 (250  $\times$  4.60mm), ipa : hex = 30:70, 1mL/min, 225 nm;  $t_{\text{R}} = 16.1$  min (minor),  $t_{\text{R}} = 18.1$  min (major).  $^1\text{H}$  NMR ( $\text{CDCl}_3$ , 400 MHz)  $\delta$ : 7.12 (d,  $J = 8.7$  Hz, 2H), 6.82 (d,  $J = 8.7$  Hz, 2H), 3.82 (t,  $J = 7.6$  Hz, 1H), 3.71 (s, 3H), 3.63 (s, 3H), 2.92 (dd,  $J = 16.8$  Hz, 7.4 Hz, 1H), 2.71 (dd,  $J = 16.8$  Hz, 7.4 Hz, 1H).  $^{13}\text{C}$  NMR ( $\text{CDCl}_3$ , 100 MHz)  $\delta$ : 171.8, 159.7, 128.7, 127.8, 117.7, 114.6, 55.3, 52.7, 46.8, 21.9. APCI-HRMS Calcd. for  $\text{C}_{12}\text{H}_{14}\text{NO}_3$  [ $\text{M}+\text{H}^+$ ]: 220.0974, found 220.0971.

**methyl 3-cyano-2-(4-fluorophenyl)propanoate**: colorless liquid; **2e**: Yield: 96%; 97%

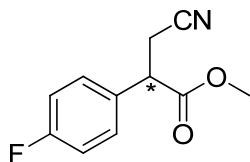

ee;  $[\alpha]_{\text{D}}^{25} = -114.6$  ( $c = 0.5$ ,  $\text{CHCl}_3$ ); HPLC condition: Lux 5u Cellulose-3 (250  $\times$  4.60mm), ipa : hex = 30:70, 1mL/min, 225 nm;  $t_{\text{R}} = 10.2$  min (major),  $t_{\text{R}} = 12.1$  min (minor). **2e'**: Yield: 97%; 97% ee;  $[\alpha]_{\text{D}}^{25} = +120.2$  ( $c = 0.5$ ,  $\text{CHCl}_3$ ); HPLC condition: Lux 5u Cellulose-3 (250  $\times$  4.60mm), ipa : hex = 30:70, 1mL/min, 225 nm;  $t_{\text{R}} = 11.1$  min (minor),  $t_{\text{R}} = 12.7$  min (major).  $^1\text{H}$  NMR ( $\text{CDCl}_3$ , 400 MHz)  $\delta$ : 7.21-7.17 (m, 2H), 7.01-6.97 (m, 2H), 3.86 (t,  $J = 7.6$  Hz, 1H), 3.64 (s, 3H), 2.93 (dd,  $J = 16.8$  Hz, 7.2 Hz, 1H), 2.73 (dd,  $J = 16.8$  Hz, 7.2 Hz, 1H).  $^{13}\text{C}$  NMR ( $\text{CDCl}_3$ , 100 MHz)  $\delta$ : 171.3, 162.7 (d,  $J = 246.0$  Hz), 131.6 (d,  $J = 4.0$  Hz), 129.4 (d,  $J = 9.0$  Hz), 117.4, 116.3 (d,  $J = 21.0$  Hz), 52.9, 46.8, 21.8. APCI-HRMS Calcd. for  $\text{C}_{11}\text{H}_{11}\text{NO}_2\text{F}$  [ $\text{M}+\text{H}^+$ ]: 208.0774, found 208.0776.

**methyl 2-(4-chlorophenyl)-3-cyanopropanoate**: white solid; MP: 68-70°C; **2f**: Yield: 97%; 98% ee;  $[\alpha]_{\text{D}}^{25} = -128.0$  ( $c = 0.5$ ,  $\text{CHCl}_3$ ); GC condition: Supelco gamma DexTM 225 column (30 m  $\times$  0.25 mm  $\times$  0.25  $\mu\text{m}$ ),  $\text{N}_2$  1.0 mL/min, programmed 100  $^\circ\text{C}$  - 1  $^\circ\text{C}/\text{min}$  - 210  $^\circ\text{C}$  - 50 min;  $t_{\text{R}} = 79.4$  min (major),  $t_{\text{R}} = 80.2$  min (minor). **2f'**:

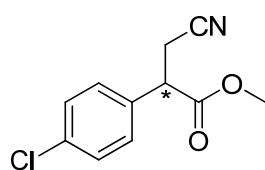

Yield: 96%; 96% ee;  $[\alpha]_{\text{D}}^{25} = +123.8$  ( $c = 0.5$ ,  $\text{CHCl}_3$ ); GC condition: Supelco gamma DexTM 225 column (30 m  $\times$  0.25 mm  $\times$  0.25  $\mu\text{m}$ ),  $\text{N}_2$  1.0 mL/min, programmed 100  $^\circ\text{C}$  - 1  $^\circ\text{C}/\text{min}$  - 210  $^\circ\text{C}$  - 50 min;  $t_{\text{R}} = 79.7$  min (minor),  $t_{\text{R}} = 80.1$  min (major).  $^1\text{H}$  NMR ( $\text{CDCl}_3$ , 400 MHz)  $\delta$ : 7.28 (d,  $J = 1.9$  Hz, 2H), 7.15 (d,  $J = 1.7$  Hz, 2H), 3.85 (t,  $J = 7.6$  Hz, 1H), 3.66 (s, 3H), 2.94 (dd,  $J = 16.9$  Hz, 7.2 Hz, 1H), 2.74 (dd,  $J = 16.9$  Hz, 7.2 Hz, 1H).  $^{13}\text{C}$  NMR ( $\text{CDCl}_3$ , 100 MHz)  $\delta$ : 171.1, 134.7, 134.1, 129.5, 129.0, 117.3, 53.0, 46.9, 21.6. APCI-HRMS Calcd. for  $\text{C}_{11}\text{H}_{11}\text{NO}_2\text{Cl}$  [ $\text{M}+\text{H}^+$ ]: 224.0478, found 224.0476.

**methyl 2-(4-bromophenyl)-3-cyanopropanoate:** white solid; MP: 70-72 $^\circ\text{C}$ ; **2g**:

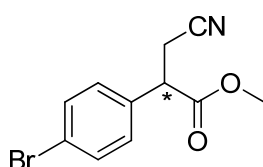

Yield: 97%; 97% ee;  $[\alpha]_{\text{D}}^{25} = -122.6$  ( $c = 0.5$ ,  $\text{CHCl}_3$ ); GC condition: Supelco gamma DexTM 225 column (30 m  $\times$  0.25 mm  $\times$  0.25  $\mu\text{m}$ ),  $\text{N}_2$  1.0 mL/min, programmed 100  $^\circ\text{C}$  - 1  $^\circ\text{C}/\text{min}$  - 200  $^\circ\text{C}$  - 100 min;  $t_{\text{R}} = 88.6$  min (major),  $t_{\text{R}} = 89.3$  min (minor). **2g'**: Yield: 97%; 96% ee;  $[\alpha]_{\text{D}}^{25} = +118.0$  ( $c = 0.5$ ,  $\text{CHCl}_3$ ); GC condition: Supelco gamma DexTM 225 column (30 m  $\times$  0.25 mm  $\times$  0.25  $\mu\text{m}$ ),  $\text{N}_2$  1.0 mL/min, programmed 100  $^\circ\text{C}$  - 1  $^\circ\text{C}/\text{min}$  - 200  $^\circ\text{C}$  - 100 min;  $t_{\text{R}} = 88.8$  min (minor),  $t_{\text{R}} = 89.1$  min (major).  $^1\text{H}$  NMR ( $\text{CDCl}_3$ , 400 MHz)  $\delta$ : 7.44 (dd,  $J = 6.7$  Hz, 1.8 Hz, 2H), 7.09 (dd,  $J = 6.7$  Hz, 1.8 Hz, 2H), 3.84 (t,  $J = 7.6$  Hz, 1H), 3.65 (s, 3H), 2.93 (dd,  $J = 16.8$  Hz, 7.2 Hz, 1H), 2.73 (dd,  $J = 16.8$  Hz, 7.2 Hz, 1H).  $^{13}\text{C}$  NMR ( $\text{CDCl}_3$ , 100 MHz)  $\delta$ : 171.0, 134.7, 132.4, 129.3, 122.8, 117.3, 53.0, 47.0, 21.6. APCI-HRMS Calcd. for  $\text{C}_{11}\text{H}_{11}\text{NO}_2\text{Br}$  [ $\text{M}+\text{H}^+$ ]: 267.9973, found 267.9975.

**methyl 3-cyano-2-(*m*-tolyl)propanoate:** white solid; MP: 57-59 $^\circ\text{C}$ ; **2h**: Yield: 98%;

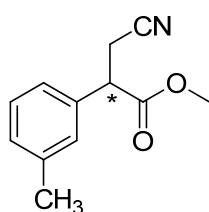

97% ee;  $[\alpha]_{\text{D}}^{25} = -144.6$  ( $c = 0.5$ ,  $\text{CHCl}_3$ ); HPLC condition: Lux 5u Cellulose-3 (250  $\times$  4.60mm), ipa : hex = 30:70, 1mL/min, 225 nm;  $t_{\text{R}} = 8.6$  min (major),  $t_{\text{R}} = 10.4$  min (minor). **2h'**: Yield: 98%; 96% ee;  $[\alpha]_{\text{D}}^{25} = +142.2$  ( $c = 0.5$ ,  $\text{CHCl}_3$ ); HPLC condition: Lux 5u Cellulose-3 (250  $\times$  4.60mm), ipa : hex = 30:70, 1mL/min, 225 nm;  $t_{\text{R}} = 9.2$  min (minor),  $t_{\text{R}} = 11.0$  min (major).  $^1\text{H}$  NMR ( $\text{CDCl}_3$ , 400 MHz)  $\delta$ : 7.20-6.98 (m, 4H), 3.82 (t,  $J = 7.6$  Hz, 1H), 3.64 (s, 3H), 2.94 (dd,  $J = 16.8$  Hz, 7.6 Hz, 1H), 2.71 (dd,  $J =$

16.8 Hz, 7.6 Hz, 1H), 2.27 (s, 3H).  $^{13}\text{C}$  NMR ( $\text{CDCl}_3$ , 100 MHz)  $\delta$ : 171.6, 139.1, 135.7, 129.3, 129.1, 128.2, 124.6, 117.7, 52.8, 47.5, 21.7, 21.4. APCI-HRMS Calcd. for  $\text{C}_{12}\text{H}_{14}\text{NO}_2$  [ $\text{M}+\text{H}^+$ ]: 204.1025, found 204.1029.

**methyl 3-cyano-2-(3-methoxyphenyl)propanoate:** colorless liquid; **2i**: Yield: 96%;

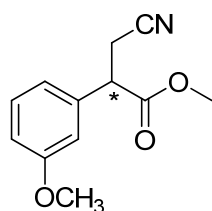

97% ee;  $[\alpha]_{\text{D}}^{25} = -130.8$  ( $c = 0.5$ ,  $\text{CHCl}_3$ ); HPLC condition: Lux 5u Cellulose-3 (250  $\times$  4.60mm), ipa : hex = 30:70, 1mL/min, 225 nm;  $t_{\text{R}} = 15.1$  min (major),  $t_{\text{R}} = 20.3$  min (minor). **2i'**: Yield: 98%; 95% ee;  $[\alpha]_{\text{D}}^{25} = +116.0$  ( $c = 0.5$ ,  $\text{CHCl}_3$ ); HPLC condition: Lux 5u

Cellulose-3 (250  $\times$  4.60mm), ipa : hex = 30:70, 1mL/min, 225 nm;  $t_{\text{R}} = 14.6$  min (minor),  $t_{\text{R}} = 19.1$  min (major).  $^1\text{H}$  NMR ( $\text{CDCl}_3$ , 400 MHz)  $\delta$ : 7.20 (t,  $J = 8.0$  Hz, 1H), 6.80-6.73 (m, 3H), 3.83 (t,  $J = 7.6$  Hz, 1H), 3.71 (s, 3H), 3.63 (s, 3H), 2.93 (dd,  $J = 16.8$  Hz, 7.6 Hz, 1H), 2.71 (dd,  $J = 16.8$  Hz, 7.6 Hz, 1H).  $^{13}\text{C}$  NMR ( $\text{CDCl}_3$ , 100 MHz)  $\delta$ : 171.4, 160.1, 137.2, 130.3, 119.7, 117.6, 113.8, 113.5, 55.3, 52.8, 47.5, 21.6. APCI-HRMS Calcd. for  $\text{C}_{12}\text{H}_{14}\text{NO}_3$  [ $\text{M}+\text{H}^+$ ]: 220.0974, found 220.0971.

**methyl 3-cyano-2-(3-fluorophenyl)propanoate:** colorless liquid; **2j**: Yield: 98%; 97%

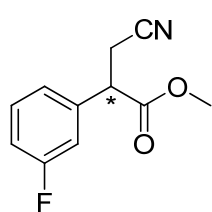

ee;  $[\alpha]_{\text{D}}^{25} = -121.8$  ( $c = 0.5$ ,  $\text{CHCl}_3$ ); GC condition: Supelco beta DexTM 120 column (30 m  $\times$  0.25 mm  $\times$  0.25  $\mu\text{m}$ ),  $\text{N}_2$  1.0 mL/min, programmed 100  $^\circ\text{C}$  - 1  $^\circ\text{C}/\text{min}$  - 210  $^\circ\text{C}$  - 100 min;  $t_{\text{R}} = 61.9$  min (minor),  $t_{\text{R}} = 62.6$  min (major). **2j'**: Yield: 97%; 96% ee;  $[\alpha]_{\text{D}}^{25} =$

+117.8 ( $c = 0.5$ ,  $\text{CHCl}_3$ ); GC condition: Supelco gamma DexTM 120 column (30 m  $\times$  0.25 mm  $\times$  0.25  $\mu\text{m}$ ),  $\text{N}_2$  1.0 mL/min, programmed 100  $^\circ\text{C}$  - 1  $^\circ\text{C}/\text{min}$  - 210  $^\circ\text{C}$  - 100 min;  $t_{\text{R}} = 62.2$  min (major),  $t_{\text{R}} = 62.5$  min (minor).  $^1\text{H}$  NMR ( $\text{CDCl}_3$ , 400 MHz)  $\delta$ : 7.31-7.19 (m, 1H), 7.01-6.87 (m, 3H), 3.87 (t,  $J = 7.6$  Hz, 1H), 3.66 (s, 3H), 2.95 (dd,  $J = 16.9$  Hz, 7.3 Hz, 1H), 2.75 (dd,  $J = 16.9$  Hz, 7.3 Hz, 1H).  $^{13}\text{C}$  NMR ( $\text{CDCl}_3$ , 100 MHz)  $\delta$ : 171.0, 163.0 (d,  $J = 247.0$  Hz), 137.9 (d,  $J = 8.0$  Hz), 130.9 (d,  $J = 8.0$  Hz), 123.4 (d,  $J = 2.0$  Hz), 117.2, 115.7 (d,  $J = 21.0$  Hz), 114.7 (d,  $J = 22.0$  Hz), 53.0, 47.2 (d,  $J = 1.0$  Hz), 21.6. APCI-HRMS Calcd. for  $\text{C}_{11}\text{H}_{11}\text{NO}_2\text{F}$  [ $\text{M}+\text{H}^+$ ]: 208.0774, found 208.0776.

**methyl 3-cyano-2-(*o*-tolyl)propanoate:** white solid; MP: 79-81°C; **2k**: Yield: 97%;

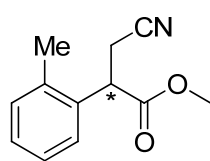

95% ee;  $[\alpha]_D^{25} = -140.6$  ( $c = 0.5$ ,  $\text{CHCl}_3$ ); HPLC condition: Lux 5u Cellulose-1 (250 × 4.60mm), ipa : hex = 20:80, 1mL/min, 225 nm;  $t_R = 12.0$  min (minor),  $t_R = 22.3$  min (major). **2k'**: Yield: 96%; 98%

ee;  $[\alpha]_D^{25} = +147.4$  ( $c = 0.5$ ,  $\text{CHCl}_3$ ); HPLC condition: Lux 5u Cellulose-1 (250 × 4.60mm), ipa : hex = 20:80, 1mL/min, 225 nm;  $t_R = 12.0$  min (major),  $t_R = 22.4$  min (minor).  $^1\text{H}$  NMR ( $\text{CDCl}_3$ , 400 MHz)  $\delta$ : 7.15-7.07 (m, 4H), 4.17 (t,  $J = 7.5$  Hz, 1H), 3.64 (s, 3H), 2.97 (dd,  $J = 16.8$  Hz, 7.7 Hz, 1H), 2.68 (dd,  $J = 16.8$  Hz, 7.4 Hz, 1H), 2.36 (s, 3H).  $^{13}\text{C}$  NMR ( $\text{CDCl}_3$ , 100 MHz)  $\delta$ : 171.9, 136.1, 134.4, 131.2, 128.4, 126.9, 126.3, 117.7, 52.8, 43.2, 21.1, 19.6. APCI-HRMS Calcd. for  $\text{C}_{12}\text{H}_{14}\text{NO}_2$   $[\text{M}+\text{H}^+]$ : 204.1025, found 204.1029.

**methyl 3-cyano-2-(2-methoxyphenyl)propanoate:** colorless liquid; **2l**: Yield: 95%;

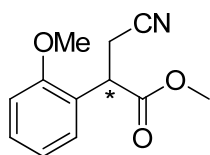

98% ee;  $[\alpha]_D^{25} = -120.2$  ( $c = 0.5$ ,  $\text{CHCl}_3$ ); HPLC condition: Lux 5u Cellulose-3 (250 × 4.60mm), ipa : hex = 30:70, 1mL/min, 225 nm;  $t_R = 9.3$  min (major),  $t_R = 13.2$  min (minor). **2l'**: Yield: 96%;

98% ee;  $[\alpha]_D^{25} = +122.2$  ( $c = 0.5$ ,  $\text{CHCl}_3$ ); HPLC condition: Lux 5u Cellulose-3 (250 × 4.60mm), ipa : hex = 30:70, 1mL/min, 225 nm;  $t_R = 11.7$  min (minor),  $t_R = 16.6$  min (major).  $^1\text{H}$  NMR ( $\text{CDCl}_3$ , 400 MHz)  $\delta$ : 7.21-7.08 (m, 2H), 6.90-6.82 (m, 2H), 4.13 (t,  $J = 7.2$  Hz, 1H), 3.75 (s, 3H), 3.63 (s, 3H), 2.95 (dd,  $J = 16.8$  Hz, 7.0 Hz, 1H), 2.73 (dd,  $J = 16.8$  Hz, 7.0 Hz, 1H).  $^{13}\text{C}$  NMR ( $\text{CDCl}_3$ , 100 MHz)  $\delta$ : 171.9, 156.6, 129.7, 129.2, 124.6, 121.1, 118.2, 111.1, 55.5, 52.6, 42.6, 20.2. APCI-HRMS Calcd. for  $\text{C}_{12}\text{H}_{14}\text{NO}_3$   $[\text{M}+\text{H}^+]$ : 220.0974, found 220.0971.

**methyl 3-cyano-2-(naphthalen-1-yl)propanoate:** white solid; MP: 78-80°C; **2m**:

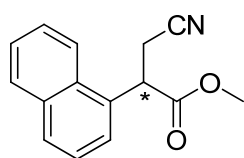

Yield: 98%; 98% ee;  $[\alpha]_D^{25} = -162.0$  ( $c = 0.5$ ,  $\text{CHCl}_3$ ); HPLC condition: Lux 5u Cellulose-1 (250 × 4.60mm), ipa : hex = 30:70, 1mL/min, 225 nm;  $t_R = 20.8$  min (minor),  $t_R = 30.3$  min

(major). **2m'**: Yield: 98%; 95% ee;  $[\alpha]_D^{25} = +156.8$  ( $c = 0.5$ ,  $\text{CHCl}_3$ ); HPLC condition: Lux 5u Cellulose-1 (250 × 4.60mm), ipa : hex = 30:70, 1mL/min, 225 nm;  $t_R = 20.7$  min (major),  $t_R = 30.4$  min (minor).  $^1\text{H}$  NMR ( $\text{CDCl}_3$ , 400 MHz)  $\delta$ : 8.01-7.84 (m, 3H), 7.62-7.40 (m, 4H), 4.75 (t,  $J = 7.8$  Hz, 1H), 3.71 (s, 3H), 3.22 (dd,  $J = 16.8$  Hz, 8.1 Hz,

1H), 2.93 (dd,  $J = 16.8$  Hz, 6.7 Hz, 1H).  $^{13}\text{C}$  NMR ( $\text{CDCl}_3$ , 100 MHz)  $\delta$ : 172.1, 134.2, 132.1, 130.8, 129.4, 129.3, 127.2, 126.2, 125.5, 125.4, 122.3, 117.8, 52.9, 43.7, 21.2. APCI-HRMS Calcd. for  $\text{C}_{15}\text{H}_{14}\text{NO}_2$  [ $\text{M}+\text{H}^+$ ]: 240.1024, found 240.1025.

**methyl 3-cyano-2-(naphthalen-2-yl)propanoate**: white solid; MP: 88-90°C; **2n**:

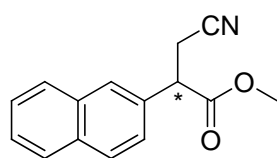

Yield: 98%; 97% ee;  $[\alpha]_{\text{D}}^{25} = -146.6$  ( $c = 0.5$ ,  $\text{CHCl}_3$ ); HPLC condition: Lux 5u Cellulose-3 (250  $\times$  4.60mm), ipa : hex = 50:50, 1mL/min, 225 nm;  $t_{\text{R}} = 14.5$  min (major),  $t_{\text{R}} = 25.3$  min (minor). **2n'**: Yield: 98%; 95% ee;  $[\alpha]_{\text{D}}^{25} = +142.2$  ( $c = 0.5$ ,  $\text{CHCl}_3$ ); HPLC condition: Lux 5u Cellulose-3 (250  $\times$  4.60mm), ipa : hex = 50:50, 1mL/min, 225 nm;  $t_{\text{R}} = 14.1$  min (minor),  $t_{\text{R}} = 24.5$  min (major).  $^1\text{H}$  NMR ( $\text{CDCl}_3$ , 400 MHz)  $\delta$ : 7.75-7.70 (m, 3H), 7.64 (s, 1H), 7.40-7.24 (m, 3H), 4.00 (t,  $J = 7.6$  Hz, 1H), 3.60 (s, 3H), 2.99 (dd,  $J = 16.8$  Hz, 7.5 Hz, 1H), 2.77 (dd,  $J = 16.8$  Hz, 7.6 Hz, 1H).  $^{13}\text{C}$  NMR ( $\text{CDCl}_3$ , 100 MHz)  $\delta$ : 171.6, 133.4, 133.2, 133.1, 129.3, 128.0, 127.8, 127.1, 126.8, 126.7, 124.8, 117.7, 52.9, 47.7, 21.7. APCI-HRMS Calcd. for  $\text{C}_{15}\text{H}_{14}\text{NO}_2$  [ $\text{M}+\text{H}^+$ ]: 240.1024, found 240.1025.

**methyl 2-(cyanomethyl)-3-methylbutanoate**: colorless liquid; **2o**: Yield: 97%; 97%

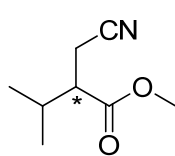

ee;  $[\alpha]_{\text{D}}^{25} = -90.2$  ( $c = 0.5$ ,  $\text{CHCl}_3$ ); GC condition: Supelco gamma DexTM 225 column (30 m  $\times$  0.25 mm  $\times$  0.25  $\mu\text{m}$ ),  $\text{N}_2$  2.0 mL/min, programmed 90 °C – 0.5 °C/min - 210 °C - 100 min;  $t_{\text{R}} = 38.8$  min (major),  $t_{\text{R}} = 41.9$  min (minor). **2o'**: Yield: 96%; 96% ee;  $[\alpha]_{\text{D}}^{25} = +87.6$  ( $c = 0.5$ ,  $\text{CHCl}_3$ ); GC condition: Supelco gamma DexTM 225 column (30 m  $\times$  0.25 mm  $\times$  0.25  $\mu\text{m}$ ),  $\text{N}_2$  2.0 mL/min, programmed 90 °C – 0.5 °C/min - 210 °C - 100 min;  $t_{\text{R}} = 39.6$  min (minor),  $t_{\text{R}} = 40.8$  min (major).  $^1\text{H}$  NMR ( $\text{CDCl}_3$ , 400 MHz)  $\delta$ : 3.68 (s, 3H), 2.63-2.43 (m, 3H), 2.07-1.99 (m, 1H), 0.91 (t,  $J = 6.6$  Hz, 6H).  $^{13}\text{C}$  NMR ( $\text{CDCl}_3$ , 100 MHz)  $\delta$ : 172.6, 118.3, 52.0, 48.0, 30.0, 19.5, 17.0. APCI-HRMS Calcd. for  $\text{C}_8\text{H}_{14}\text{NO}_2$  [ $\text{M}+\text{H}^+$ ]: 156.1025, found 156.1028.

**methyl 3-cyano-2-cyclohexylpropanoate**: colorless liquid; **2p**: Yield: 95%; 97% ee;

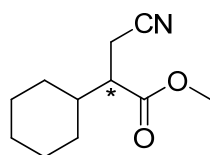

$[\alpha]_{\text{D}}^{25} = -22.8$  ( $c = 0.5$ ,  $\text{CHCl}_3$ ); GC condition: Supelco gamma DexTM 225 column (30 m  $\times$  0.25 mm  $\times$  0.25  $\mu\text{m}$ ),  $\text{N}_2$  0.8 mL/min,

programmed 90 °C – 0.8 °C/min - 200 °C - 50 min;  $t_R = 78.3$  min (major),  $t_R = 79.6$  min (minor). **2p'**: Yield: 96%; 94% ee;  $[\alpha]_D^{25} = +20.6$  (c = 0.5, CHCl<sub>3</sub>); GC condition: Supelco gamma Dex™ 225 column (30 m × 0.25 mm × 0.25 μm), N<sub>2</sub> 0.8 mL/min, programmed 90 °C – 0.8 °C/min - 200 °C - 50 min;  $t_R = 78.5$  min (minor),  $t_R = 79.0$  min (major). <sup>1</sup>H NMR (CDCl<sub>3</sub>, 400 MHz) δ: 3.68 (s, 3H), 2.62-2.45 (m, 3H), 1.71-1.55 (m, 6H), 1.23-0.95 (m, 5H). <sup>13</sup>C NMR (CDCl<sub>3</sub>, 100 MHz) δ: 172.8, 118.3, 52.0, 47.6, 39.6, 30.1, 30.0, 26.0, 25.9, 25.8, 17.1.<sup>[4]</sup>

**4-oxo-3,4-diphenylbutanenitrile (4a)**: colorless liquid; Yield: 96%; 95% ee;  $[\alpha]_D^{25} =$

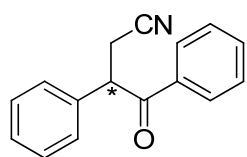

+76.0 (c = 0.5, CHCl<sub>3</sub>); HPLC condition: Lux 5u Cellulose-1 (250 × 4.60mm), ipa : hex = 30:70, 1mL/min, 254 nm;  $t_R = 10.2$  min (major),  $t_R = 19.4$  min (minor). <sup>1</sup>H NMR (CDCl<sub>3</sub>, 400 MHz)

δ: 7.81 (d,  $J = 1.2$  Hz, 2H), 7.39-7.16 (m, 8H), 4.78 (t,  $J = 7.4$  Hz, 1H), 2.98 (dd,  $J = 16.8$  Hz, 6.6 Hz, 1H), 2.78 (dd,  $J = 16.8$  Hz, 6.6 Hz, 1H). <sup>13</sup>C NMR (CDCl<sub>3</sub>, 100 MHz) δ: 196.0, 136.5, 135.0, 133.7, 129.7, 129.0, 128.7, 128.5, 128.0, 118.4, 50.3, 22.1.

**3,4-bis(2-methoxyphenyl)-4-oxobutanenitrile (4b)**: colorless liquid; Yield: 97%; 96%

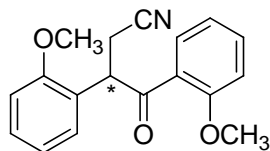

ee;  $[\alpha]_D^{25} = +50.8$  (c = 0.5, CHCl<sub>3</sub>); HPLC condition: Lux 5u Cellulose-1 (250 × 4.60mm), ipa : hex = 10:90, 1mL/min, 254 nm;  $t_R = 14.4$  min (major),  $t_R = 20.3$  min (minor). <sup>1</sup>H NMR (CDCl<sub>3</sub>, 400 MHz) δ: 7.61 (d,  $J = 1.2$  Hz, 1H), 7.59-7.05 (m,

3H), 6.91-6.71 (m, 4H), 5.11 (t,  $J = 6.7$  Hz, 1H), 3.74 (s, 3H), 3.71 (s, 3H), 3.20 (dd,  $J = 16.8$  Hz, 6.2 Hz, 1H), 2.78 (dd,  $J = 16.8$  Hz, 6.2 Hz, 1H). <sup>13</sup>C NMR (CDCl<sub>3</sub>, 100 MHz) δ: 199.4, 157.6, 156.7, 133.4, 130.7, 130.0, 129.3, 126.9, 125.3, 120.7, 120.5, 119.2, 111.0, 110.6, 55.1, 49.5, 19.3.

**4-oxo-3,4-di-*m*-tolylbutanenitrile (4c)**: colorless liquid; Yield: 95%; 91% ee;  $[\alpha]_D^{25}$

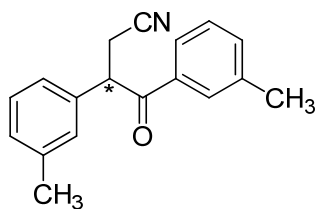

= +73.3 (c = 0.5, CHCl<sub>3</sub>); HPLC condition: Lux 5u Cellulose-1 (250 × 4.60mm), ipa : hex = 30:70, 1mL/min, 254 nm;  $t_R = 6.3$  min (major),  $t_R = 11.2$  min (minor). <sup>1</sup>H NMR (CDCl<sub>3</sub>, 400 MHz) δ: 7.77-7.69 (m,

2H), 7.31-7.20 (m, 3H), 7.12-7.07 (m, 3H), 4.83 (t,  $J = 7.3$  Hz, 1H), 3.06 (dd,  $J = 16.8$  Hz, 6.7 Hz, 1H), 2.68 (dd,  $J = 16.8$  Hz, 6.7 Hz, 1H), 2.33 (s, 3H), 2.30 (s, 3H). <sup>13</sup>C



NMR (CDCl<sub>3</sub>, 100 MHz)  $\delta$ : 196.3, 139.4, 138.6, 136.5, 135.1, 134.4, 129.5, 129.4, 129.2, 128.5, 128.4, 126.3, 125.2, 118.5, 50.3, 22.1, 21.4, 21.3.

**4-oxo-3,4-di-*p*-tolylbutanenitrile (4d)**: colorless liquid; Yield: 95%; 92% ee;  $[\alpha]_D^{25} =$

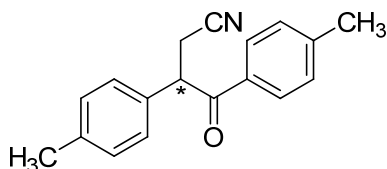

+67.1 (c = 0.5, CHCl<sub>3</sub>); HPLC condition: Lux 5u Cellulose-1 (250 × 4.60mm), ipa : hex = 30:70, 1mL/min, 254 nm;  $t_R = 8.9$  min (major),  $t_R = 9.8$

min (minor). <sup>1</sup>H NMR (CDCl<sub>3</sub>, 400 MHz)  $\delta$ : 7.82 (d,  $J = 8.3$  Hz, 2H), 7.19-7.12 (m, 6H), 4.81 (t,  $J = 7.7$  Hz, 1H), 3.03 (dd,  $J = 16.8$  Hz, 6.5 Hz, 1H), 2.84 (dd,  $J = 16.8$  Hz, 6.5 Hz, 1H), 2.33 (s, 3H), 2.28 (s, 3H). <sup>13</sup>C NMR (CDCl<sub>3</sub>, 100 MHz)  $\delta$ : 195.7, 144.5, 138.2, 133.7, 132.6, 130.3, 129.4, 129.1, 127.8, 118.5, 49.9, 22.1, 21.6, 21.1.

**3,4-bis(4-methoxyphenyl)-4-oxobutanenitrile (4e)**: colorless liquid; Yield: 96%; 94%

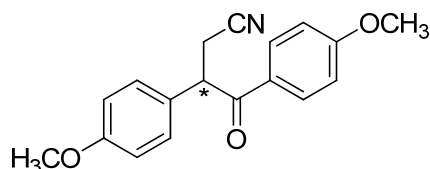

ee;  $[\alpha]_D^{25} = +63.2$  (c = 0.5, CHCl<sub>3</sub>); HPLC condition: Lux 5u Cellulose-1 (250 × 4.60mm), ipa : hex = 30:70, 1mL/min, 254 nm;  $t_R = 20.8$  min

(major),  $t_R = 26.3$  min (minor). <sup>1</sup>H NMR (CDCl<sub>3</sub>, 400 MHz)  $\delta$ : 7.88 (d,  $J = 9.0$  Hz, 2H), 7.19 (d,  $J = 8.7$  Hz, 2H), 6.86-6.82 (m, 4H), 4.75 (t,  $J = 6.2$  Hz, 1H), 3.79 (s, 3H), 3.74 (s, 3H), 3.01 (dd,  $J = 16.8$  Hz, 6.4 Hz, 1H), 2.83 (dd,  $J = 16.8$  Hz, 6.4 Hz, 1H). <sup>13</sup>C NMR (CDCl<sub>3</sub>, 100 MHz)  $\delta$ : 194.6, 163.7, 159.5, 131.3, 129.0, 128.9, 128.0, 118.6, 115.0, 113.9, 55.5, 55.2, 49.2, 22.2.

**4-hydroxy-3,4-diphenylbutanenitrile (5a)**: white solid; MP: 88-90°C; Yield: 92%;

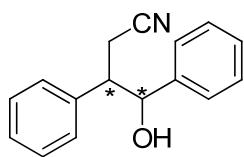

95% ee;  $[\alpha]_D^{25} = -52.6$  (c = 0.5, CHCl<sub>3</sub>); HPLC condition: Lux 5u Cellulose-1 (250 × 4.60mm), ipa : hex = 10:90, 1mL/min, 254 nm;  $t_R = 25.0$  min (major),  $t_R = 33.9$  min (minor). <sup>1</sup>H

NMR (CDCl<sub>3</sub>, 400 MHz)  $\delta$ : 7.27-7.12 (m, 10H), 4.90 (d,  $J = 7.1$  Hz, 1H), 3.14 (dd,  $J = 14.0$  Hz, 7.9 Hz, 1H), 2.58 (dd,  $J = 16.8$  Hz, 5.8 Hz, 1H), 2.41 (q,  $J = 8.3$  Hz, 1H), 2.03 (s, 1H). <sup>13</sup>C NMR (CDCl<sub>3</sub>, 100 MHz)  $\delta$ : 140.9, 137.6, 128.8, 128.6, 128.5, 128.4, 128.0, 126.5, 118.4, 76.1, 49.7, 21.1.

**4-hydroxy-3,4-bis(2-methoxyphenyl)butanenitrile (5b)**: colorless liquid; Yield: 89%; 96% ee;  $[\alpha]_D^{25} = -41.4$  (c = 0.5, CHCl<sub>3</sub>); HPLC condition: Lux 5u Cellulose-1 (250 × 4.60mm), ipa : hex = 30:70, 1mL/min, 254 nm;  $t_R = 15.8$  min (major),  $t_R =$

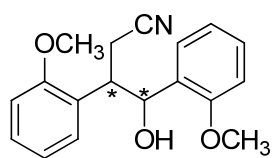

23.2 min (minor).  $^1\text{H}$  NMR ( $\text{CDCl}_3$ , 400 MHz)  $\delta$ : 7.13-7.01 (m, 4H), 6.84-6.69 (m, 4H), 5.19 (s, 1H), 3.79-3.71 (m, 1H), 3.68 (s, 3H), 3.54 (s, 3H), 2.69 (s, 1H), 2.56-2.50 (m, 2H).  $^{13}\text{C}$  NMR ( $\text{CDCl}_3$ , 100 MHz)  $\delta$ : 157.5, 156.6, 129.6, 129.3, 128.8, 128.7, 127.5, 126.4, 120.8, 120.7, 119.0, 110.9, 110.4, 71.5, 55.4, 55.3, 19.9.

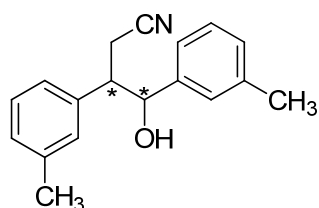

**4-hydroxy-3,4-di-*m*-tolylbutanenitrile (5c):** colorless liquid; Yield: 90%; 90% ee;  $[\alpha]_{\text{D}}^{25} = -42.2$  ( $c = 0.5$ ,  $\text{CHCl}_3$ ); HPLC condition: Lux 5u Cellulose-1 (250  $\times$  4.60mm), ipa : hex = 10:90, 1mL/min, 254 nm;  $t_{\text{R}} = 17.4$

min (major),  $t_{\text{R}} = 19.8$  min (minor).  $^1\text{H}$  NMR ( $\text{CDCl}_3$ , 400 MHz)  $\delta$ : 7.14-7.09 (m, 2H), 7.01-6.92 (m, 6H), 4.75 (d,  $J = 7.6$  Hz, 1H), 3.07-3.02 (m, 1H), 2.43 (dd,  $J = 16.8$  Hz, 5.4 Hz, 1H), 2.31 (q,  $J = 8.6$  Hz, 1H), 2.22 (d,  $J = 1.0$  Hz, 6H), 1.99 (s, 1H).  $^{13}\text{C}$  NMR ( $\text{CDCl}_3$ , 100 MHz)  $\delta$ : 140.8, 138.5, 138.4, 137.8, 129.2, 129.1, 128.9, 128.8, 128.5, 127.3, 125.4, 123.8, 118.4, 76.4, 49.8, 21.5, 21.4, 21.2.

**4-hydroxy-3,4-di-*p*-tolylbutanenitrile (5d):** colorless liquid; Yield: 89%; 92% ee;  $[\alpha]_{\text{D}}^{25} = -43.6$  ( $c = 0.5$ ,  $\text{CHCl}_3$ ); HPLC condition: Lux 5u Cellulose-1 (250  $\times$  4.60mm),

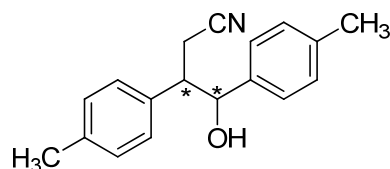

ipa : hex = 10:90, 1mL/min, 254 nm;  $t_{\text{R}} = 9.4$  min (major),  $t_{\text{R}} = 11.5$  min (minor).  $^1\text{H}$  NMR ( $\text{CDCl}_3$ , 400 MHz)  $\delta$ : 7.18-7.13 (m, 8H), 4.90 (d,  $J = 20.7$  Hz, 1H), 3.21-3.16 (m, 1H), 2.59 (dd,  $J = 16.8$  Hz, 5.5

Hz, 1H), 2.44 (q,  $J = 8.0$  Hz, 1H), 2.36 (s, 6H), 2.14 (s, 1H).  $^{13}\text{C}$  NMR ( $\text{CDCl}_3$ , 100 MHz)  $\delta$ : 138.2, 137.9, 137.7, 134.8, 129.6, 129.3, 128.3, 126.5, 118.5, 76.2, 49.4, 21.3, 21.2, 21.1.

**4-hydroxy-3,4-bis(4-methoxyphenyl)butanenitrile (5e):** white solid; MP:

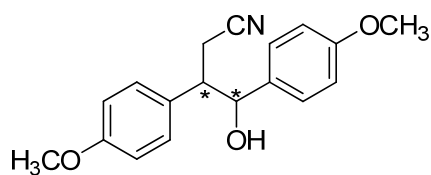

118-120°C; Yield: 91%; 94% ee;  $[\alpha]_{\text{D}}^{25} = -51.0$  ( $c = 0.5$ ,  $\text{CHCl}_3$ ); HPLC condition: Lux 5u Cellulose-1 (250  $\times$  4.60mm), ipa : hex = 10:90, 1mL/min, 254 nm;  $t_{\text{R}} = 9.5$  min (major),  $t_{\text{R}} = 17.9$

min (minor).  $^1\text{H}$  NMR ( $\text{CDCl}_3$ , 400 MHz)  $\delta$ : 7.16 (dd,  $J = 8.6$  Hz, 1.9 Hz, 4H), 6.89-6.85 (m, 4H), 4.89 (d,  $J = 7.2$  Hz, 1H), 3.80 (s, 6H), 3.18-3.13 (m, 1H), 2.62 (dd,

$J = 16.8$  Hz,  $5.6$  Hz,  $1\text{H}$ ),  $2.45$  (q,  $J = 8.2$  Hz,  $1\text{H}$ ),  $205$  (s,  $1\text{H}$ ).  $^{13}\text{C}$  NMR ( $\text{CDCl}_3$ ,  $100$  MHz)  $\delta$ :  $159.6$ ,  $159.3$ ,  $133.0$ ,  $129.7$ ,  $129.5$ ,  $127.8$ ,  $118.5$ ,  $114.3$ ,  $114.0$ ,  $75.9$ ,  $55.3$ ,  $55.2$ ,  $49.1$ ,  $21.3$ .

### 7. Procedure for the synthesis of compound 6 and 7.<sup>[5]</sup>

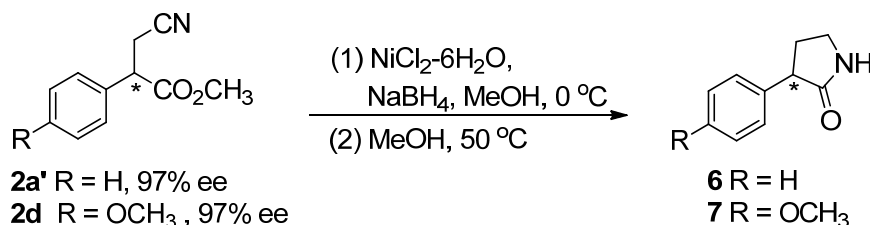

To a stirring solution of the hydrogenation product ( $0.2$  mmol) in MeOH ( $3$  mL)  $\text{NiCl}_2 \cdot 6\text{H}_2\text{O}$  ( $0.4$  mmol) was first added, then  $\text{NaBH}_4$  ( $1.6$  mmol) was added portionwise at  $0$  °C over  $1$  h. The mixture was stirred at room temperature for  $15$  min and carefully quenched with  $\text{H}_2\text{O}$ . The aqueous layer was extracted with ethyl acetate, dried over  $\text{MgSO}_4$ . The solvent was removed in vacuo, the residue was heated and stirred at  $40$  °C in MeOH for  $1$  h. After the usual workup, the residue was purified by silica gel column chromatography using petroleum ether/ AcOEt as an eluent.

**3-phenylpyrrolidin-2-one (6):** Yield:  $83\%$ ; white solid; MP:  $84$ - $86$ °C;  $94\%$  ee;

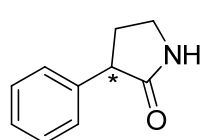

$[\alpha]_{\text{D}}^{25} = +22.0$  ( $c = 0.5$ ,  $\text{CHCl}_3$ ); GC condition: Supelco gamma DexTM 225 column ( $30$  m  $\times$   $0.25$  mm  $\times$   $0.25$   $\mu\text{m}$ ),  $\text{N}_2$   $5.0$  mL/min, programmed  $100$  °C –  $8$  °C/min -  $200$  °C -  $100$  min;  $t_{\text{R}} = 15.3$  min

(minor),  $t_{\text{R}} = 16.2$  min (major).  $^1\text{H}$  NMR ( $\text{CDCl}_3$ ,  $400$  MHz)  $\delta$ :  $7.30$ - $7.17$  (m,  $5\text{H}$ ),  $6.75$  (s,  $1\text{H}$ ),  $3.58$ - $3.40$  (m,  $1\text{H}$ ),  $3.39$ - $3.33$  (m,  $2\text{H}$ ),  $2.57$ - $2.50$  (m,  $1\text{H}$ ),  $2.23$ - $2.15$  (m,  $1\text{H}$ ).<sup>[6]</sup>

**3-(4-methoxyphenyl)pyrrolidin-2-one (7):** Yield:  $85\%$ ; white solid; MP:  $122$ - $124$ °C;

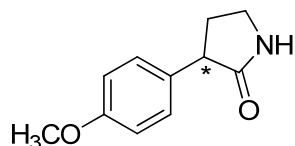

$96\%$  ee;  $[\alpha]_{\text{D}}^{25} = -28.6$  ( $c = 0.5$ ,  $\text{CHCl}_3$ ); GC condition: Supelco gamma DexTM 225 column ( $30$  m  $\times$   $0.25$  mm  $\times$   $0.25$   $\mu\text{m}$ ),  $\text{N}_2$   $5.0$  mL/min, programmed  $100$  °C –  $8$  °C/min -

$200$  °C -  $50$  min;  $t_{\text{R}} = 24.8$  min (major),  $t_{\text{R}} = 28.9$  min (minor).  $^1\text{H}$  NMR ( $\text{CDCl}_3$ ,  $400$  MHz)  $\delta$ :  $7.22$ - $7.18$  (m,  $2\text{H}$ ),  $6.90$ - $6.87$  (m,  $2\text{H}$ ),  $6.70$  (s,  $1\text{H}$ ),  $3.79$  (s,  $3\text{H}$ ),  $3.57$  (t,  $J = 9.1$  Hz,  $1\text{H}$ ),  $3.48$ - $3.39$  (m,  $2\text{H}$ ),  $2.62$ - $2.53$  (m,  $1\text{H}$ ),  $2.26$ - $2.16$  (m,  $1\text{H}$ ).  $^{13}\text{C}$  NMR

(CDCl<sub>3</sub>, 100 MHz)  $\delta$ : 179.1, 158.7, 131.4, 129.0, 114.2, 55.3, 46.7, 40.5, 30.8.  
 APCI-HRMS Calcd. for C<sub>11</sub>H<sub>14</sub>NO<sub>2</sub> [M+H<sup>+</sup>]: 192.1025, found 192.1029.

### 8. Procedure for the synthesis of compound 8 and 9.<sup>[1]</sup>

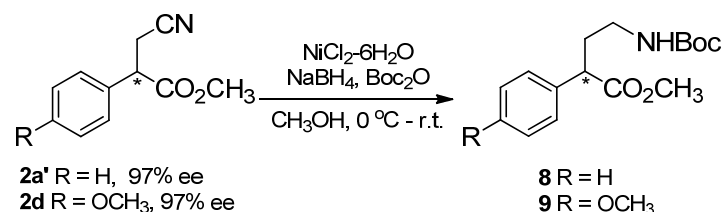

To a stirring solution of the hydrogenation product (0.2 mmol) in MeOH (3 mL) Boc<sub>2</sub>O (0.4 mmol) and NiCl<sub>2</sub>·6H<sub>2</sub>O (0.4 mmol) were first added, then NaBH<sub>4</sub> (1.6 mmol) was added portionwise at 0 °C over 1 h. The mixture was stirred at room temperature until no starting material was detected by TLC and carefully quenched with H<sub>2</sub>O. The aqueous layer was extracted with ethyl acetate, dried over MgSO<sub>4</sub>. After the solvent was removed in vacuo, the residue was purified by silica gel column chromatography using petroleum ether/ AcOEt as an eluent.

**methyl 4-((*tert*-butoxycarbonyl)amino)-2-phenylbutanoate (8):** Yield: 83%;

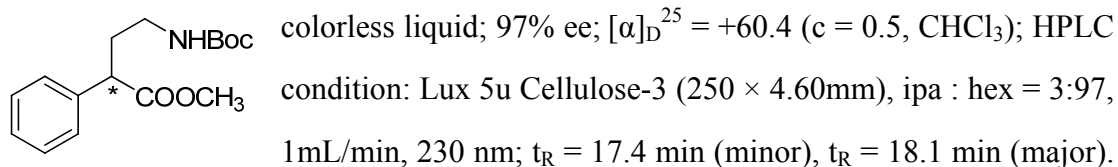

<sup>1</sup>H NMR (CDCl<sub>3</sub>, 400 MHz)  $\delta$ : 7.31-7.23 (m, 5H), 4.58 (s, 1H), 3.65-3.59 (m, 4H), 3.11-3.06 (m, 2H), 2.32-2.23 (m, 1H), 1.99-1.91 (m, 1H), 1.42 (s, 9H).<sup>[7]</sup>

**methyl 4-((*tert*-butoxycarbonyl)amino)-2-(4-methoxyphenyl)butanoate (9):** Yield:

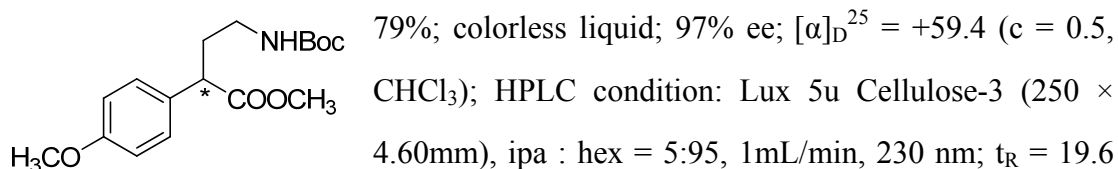

<sup>1</sup>H NMR (CDCl<sub>3</sub>, 400 MHz)  $\delta$ : 7.20 (dd,  $J = 6.7$  Hz, 2.0 Hz, 2H), 6.85 (dd,  $J = 6.7$  Hz, 2.0 Hz, 2H), 4.55 (s, 1H), 3.77 (s, 3H), 3.64 (s, 3H), 3.55 (t,  $J = 7.6$  Hz, 1H), 3.09-3.04 (m, 2H), 2.28-2.19 (m, 1H), 1.96-1.88 (m, 1H), 1.42 (s, 9H). <sup>13</sup>C NMR (CDCl<sub>3</sub>, 100 MHz)  $\delta$ : 174.3, 158.9, 155.8, 130.4, 128.9,

---

114.2, 79.2, 55.2, 52.1, 48.2, 38.8, 33.6, 28.4. APCI-HRMS Calcd. for C<sub>17</sub>H<sub>26</sub>NO<sub>5</sub> [M+H<sup>+</sup>]: 324.1811, found 324.1807.

## References

- [1] E. Brenna, F. G. Gatti, A. Manfredi, D. Monti and F. Parmeggiani, *Catal. Sci. Technol.* 2013, **3**, 1136.
- [2] J. Meng, M. Gao, H. Lv, X. Zhang, *Org. Lett.* **2015**, *17*, 1842.
- [3] A. Spencer, *J. Organomet. Chem.* 1982, **240**, 209.
- [4] R. Giovannini and Petrini, M. *Tetrahedron Lett.* 1997, **38**, 3781.
- [5] E. Dieter and N. Oliver, *Heterocycles* 2005, **66**, 385.
- [6] B. J. Kim, Y. S. Park and P. Beak, *J. Org. Chem.* 1999, **64**, 1705.
- [7] R. D. Clark and Jahangir, *Tetrahedron* 1993, **49**, 1351.

## 9. NMR, GC and HPLC spectra of compounds 1-9.

### (Z)-methyl 3-cyano-2-phenylacrylate (1a)

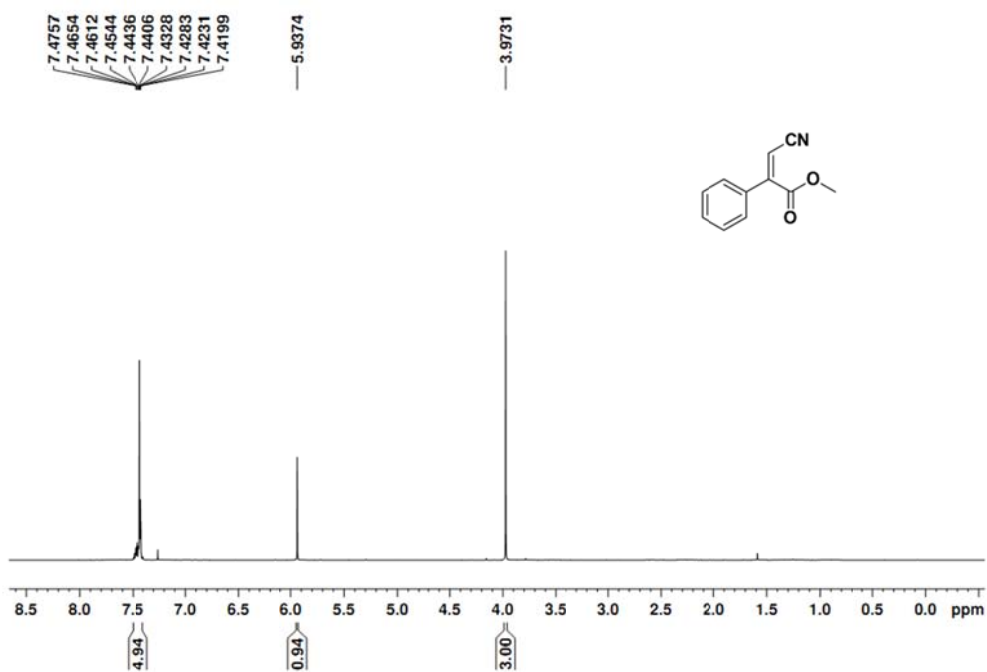

### (E)-methyl 3-cyano-2-phenylacrylate (1a')

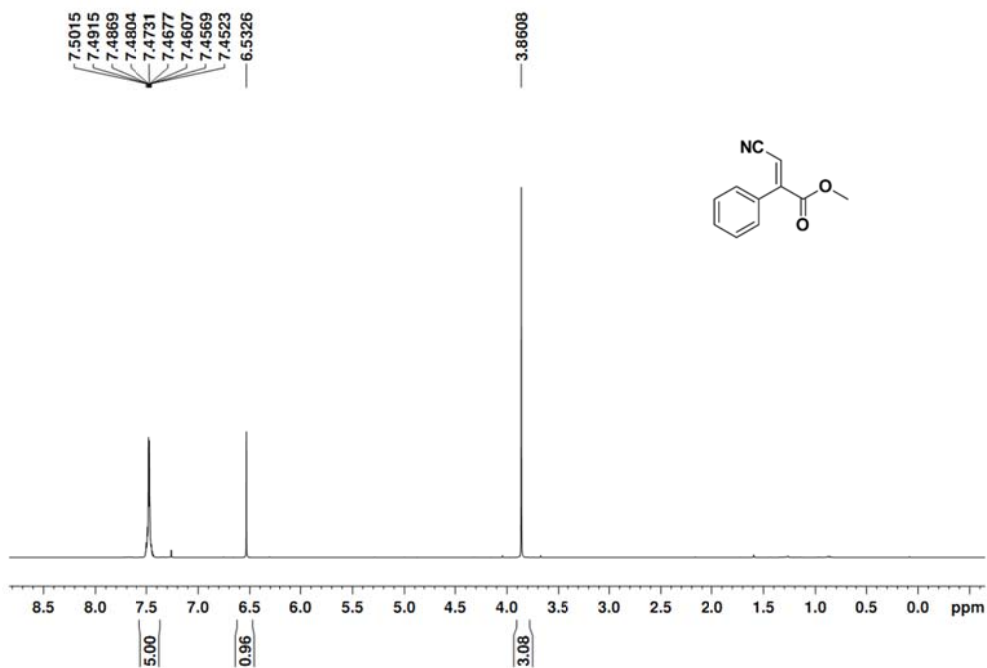

**(Z)-ethyl 3-cyano-2-phenylacrylate (1b)**

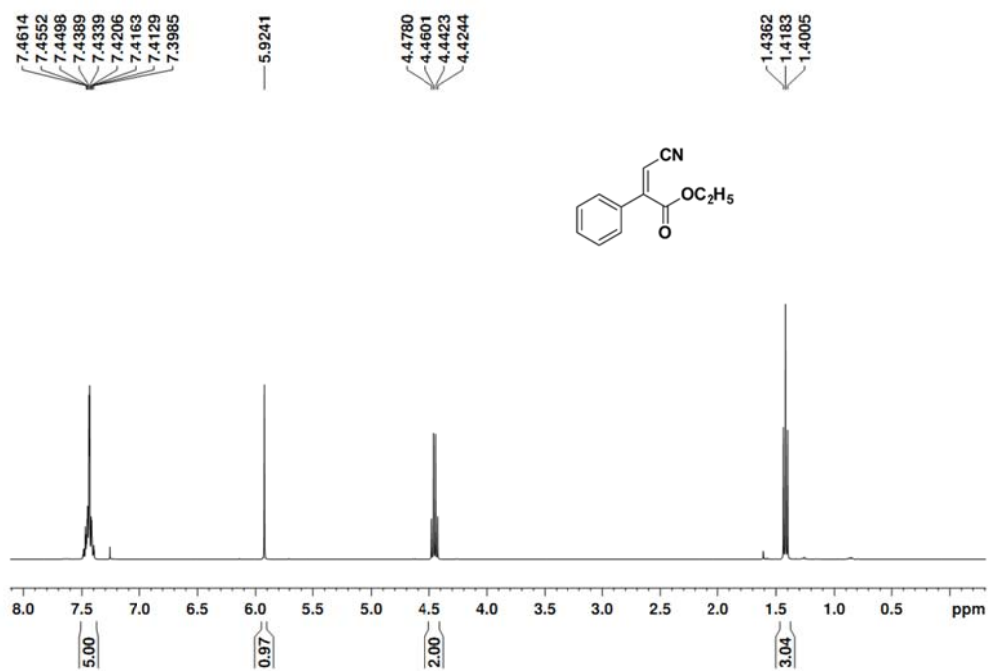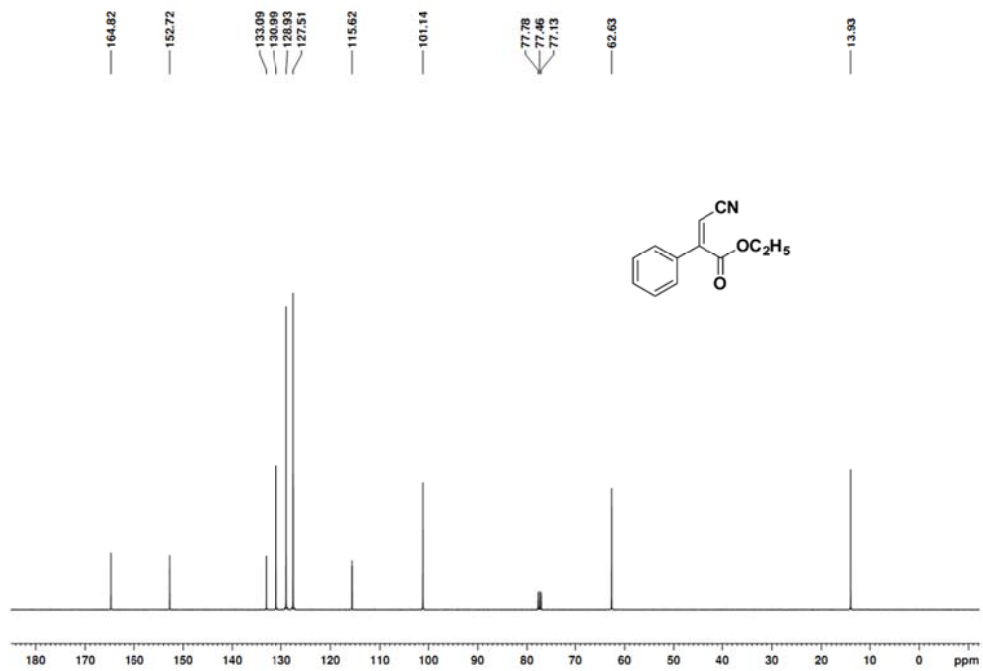

**(E)-ethyl 3-cyano-2-phenylacrylate (1b')**

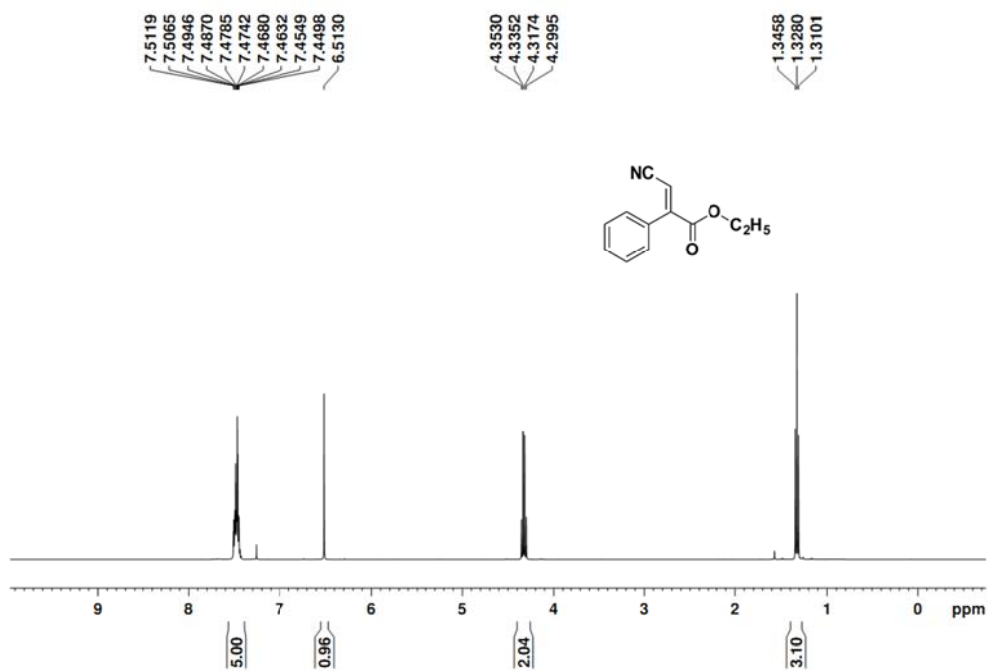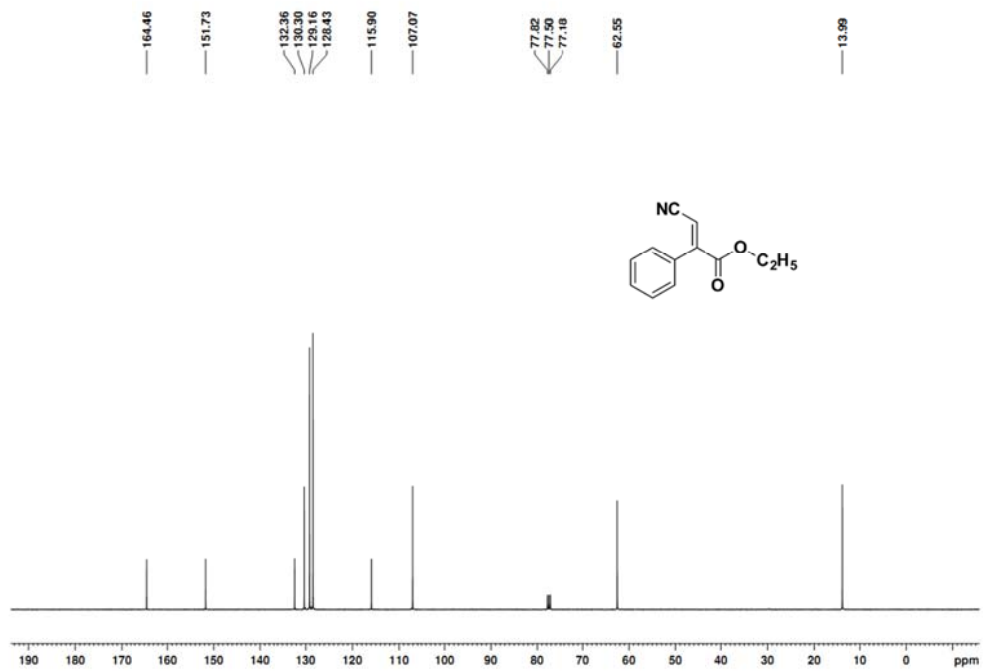



(Z)-methyl 3-cyano-2-(p-tolyl)acrylate (1c)

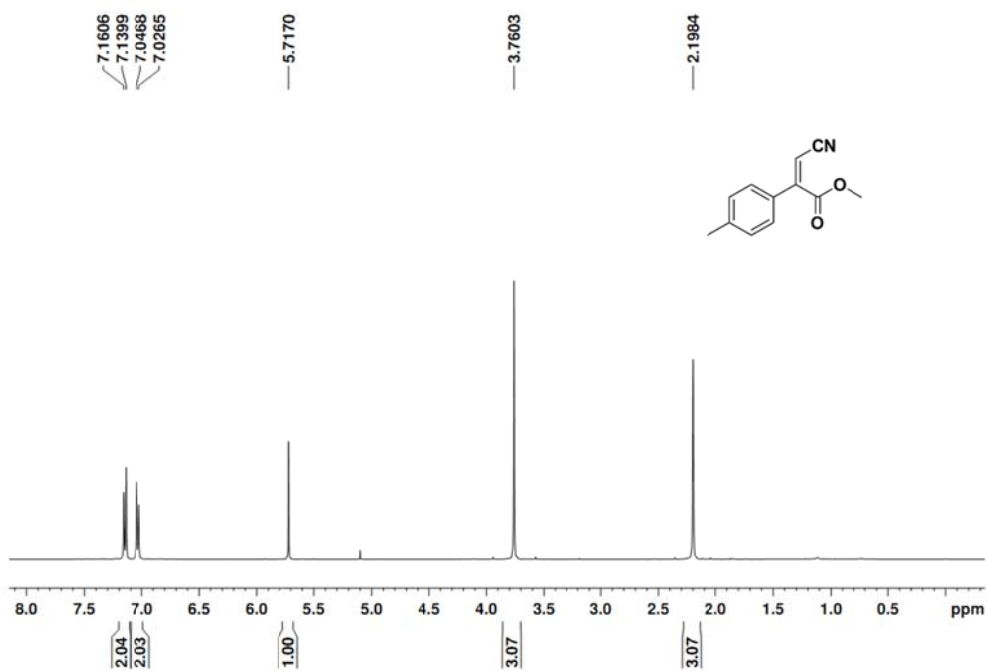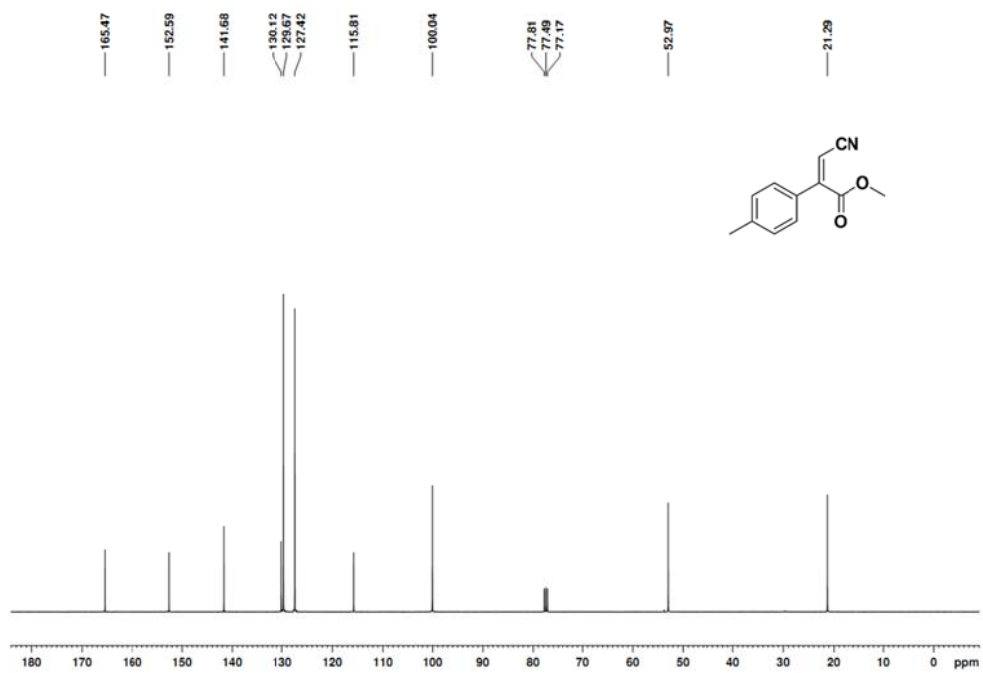

**(E)-methyl 3-cyano-2-(p-tolyl)acrylate (1c')**

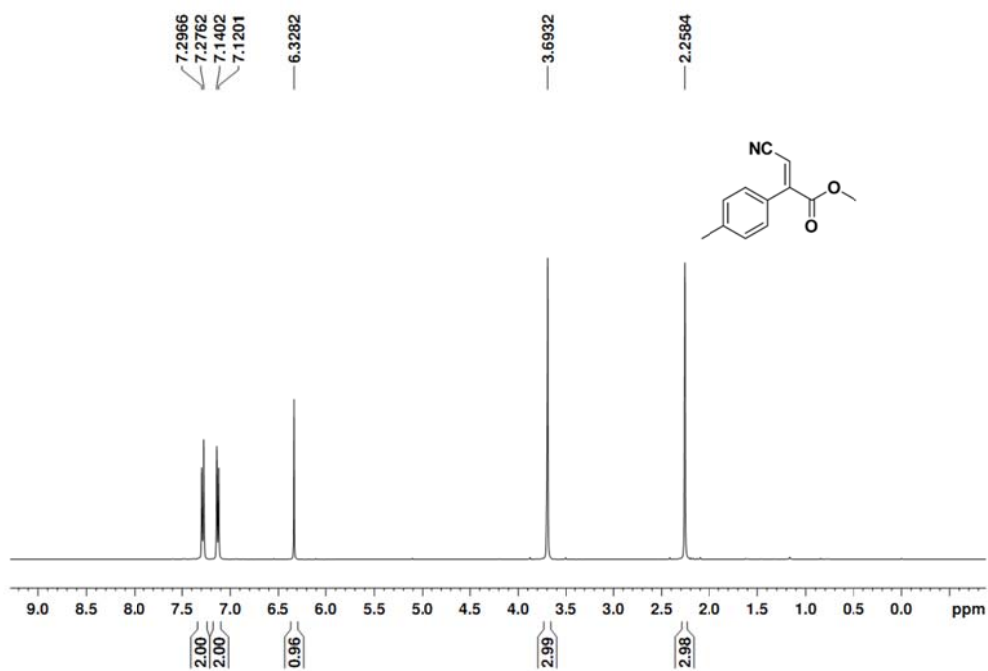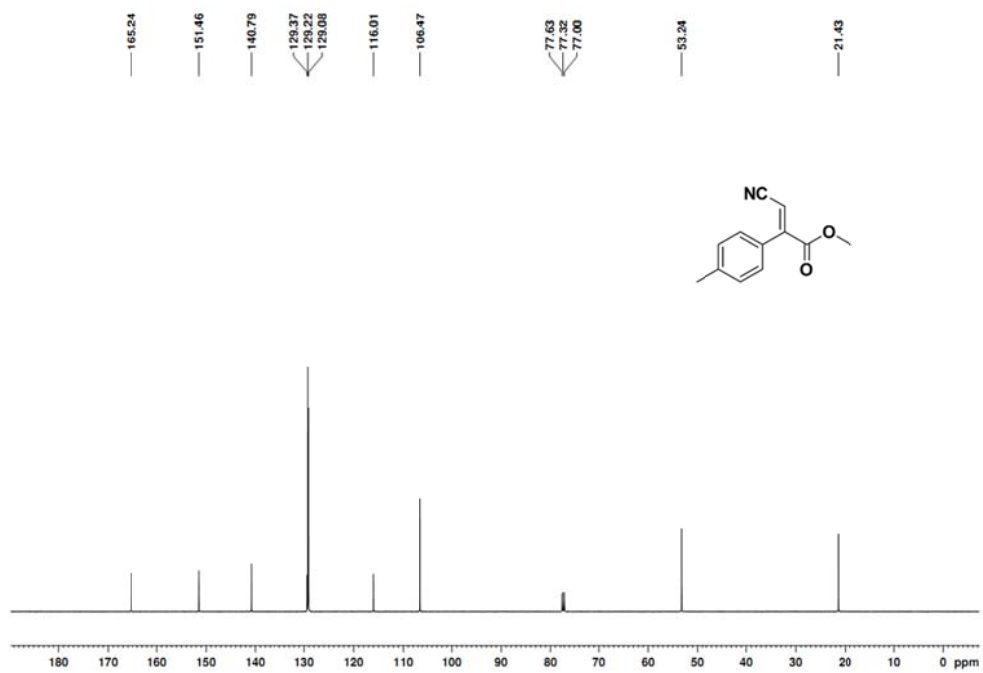

**(Z)-methyl 3-cyano-2-(4-methoxyphenyl)acrylate (1d)**

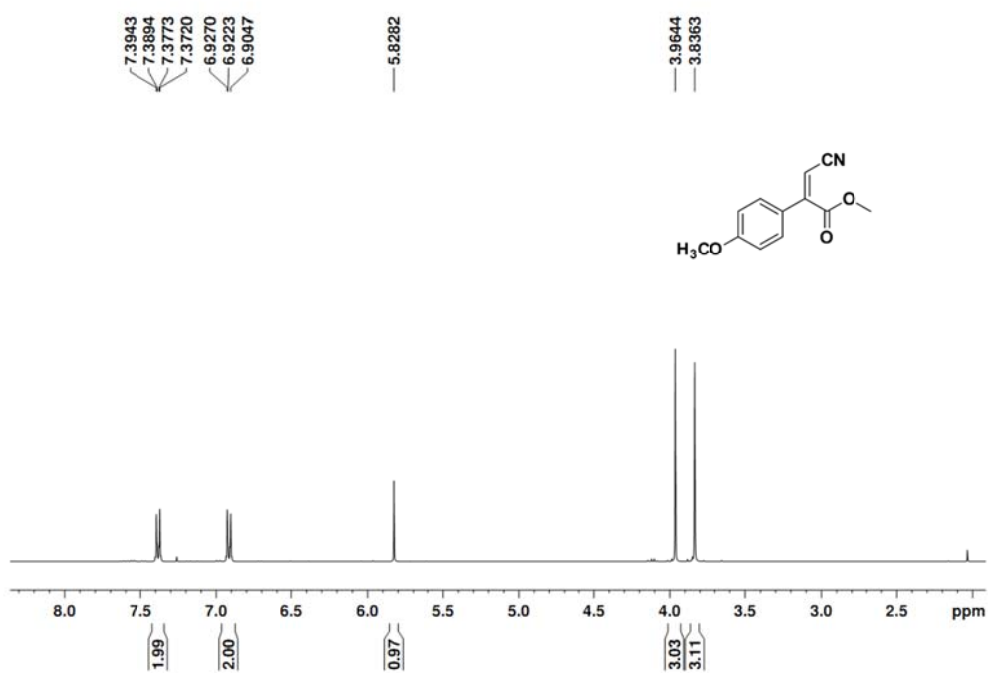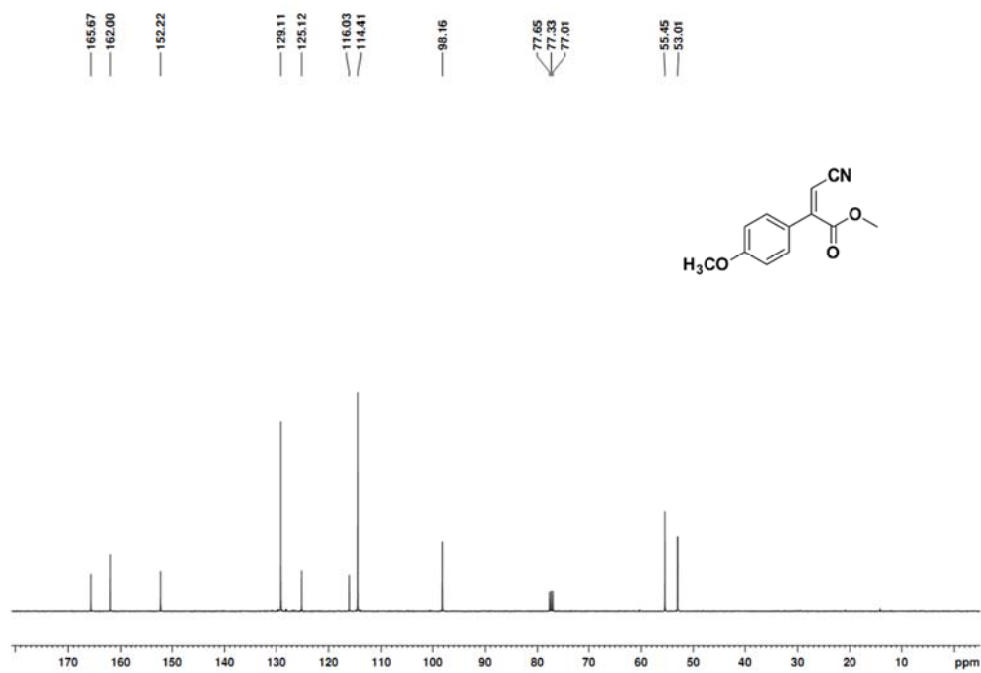

**(E)-methyl 3-cyano-2-(4-methoxyphenyl)acrylate (1d')**

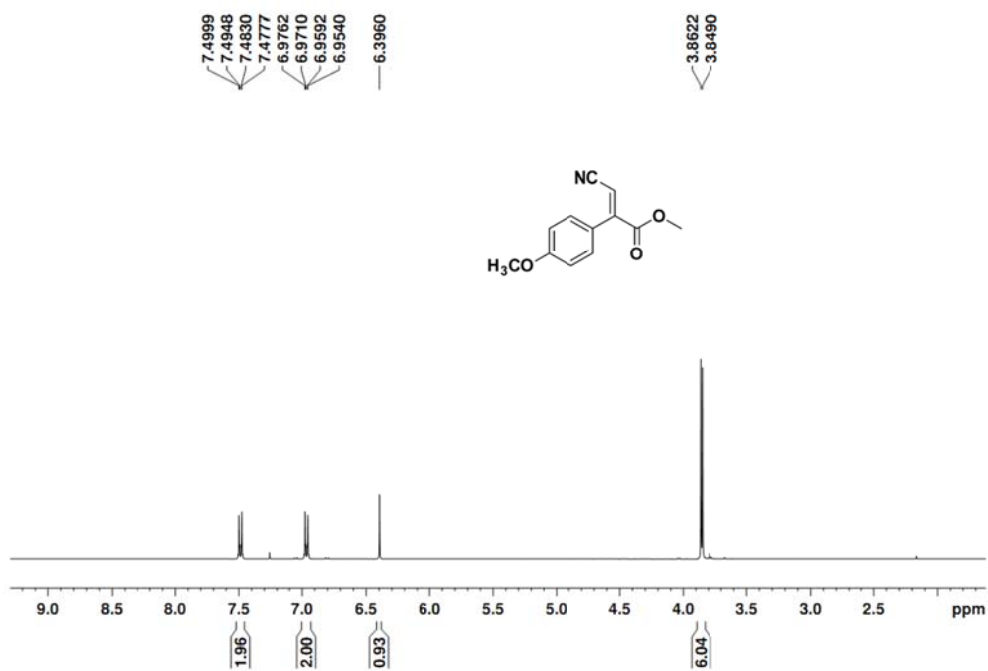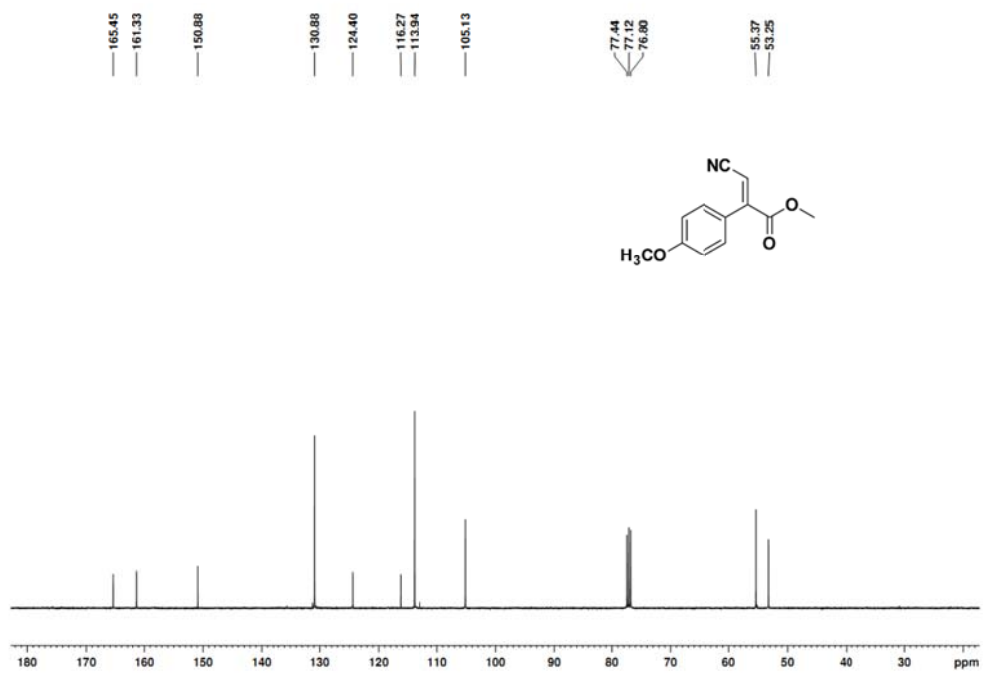

**(Z)-methyl 3-cyano-2-(4-fluorophenyl)acrylate (1e)**

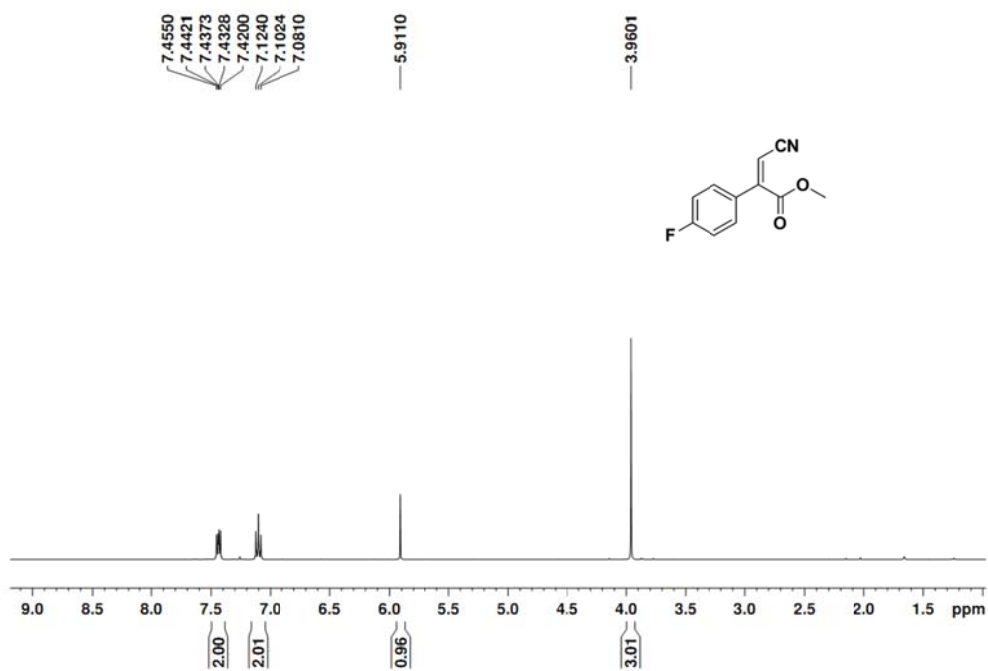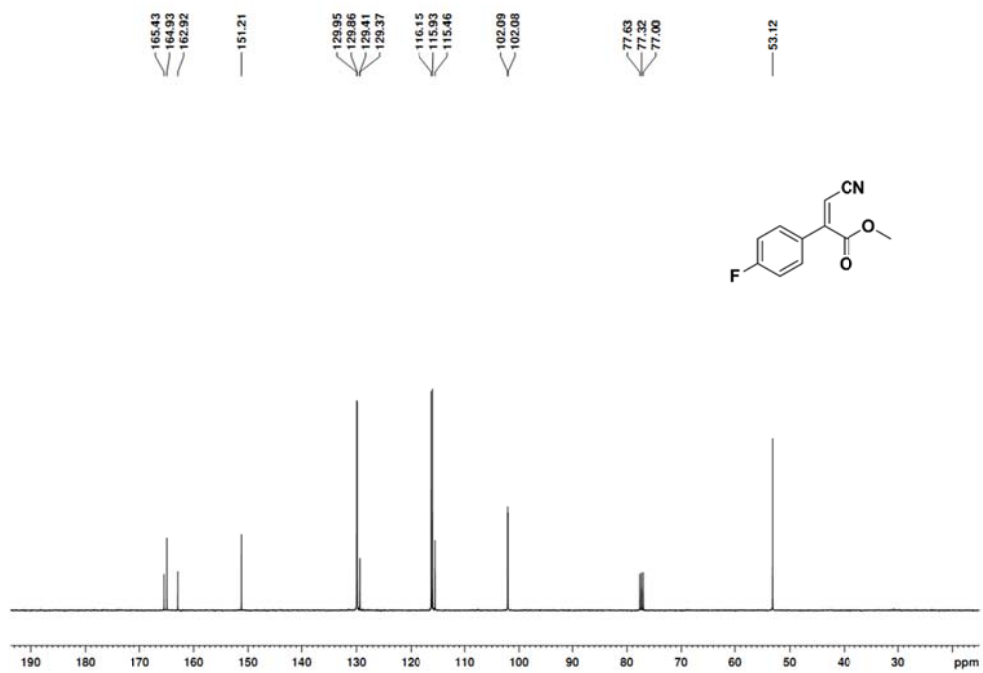

**(E)-methyl 3-cyano-2-(4-fluorophenyl)acrylate (1e')**

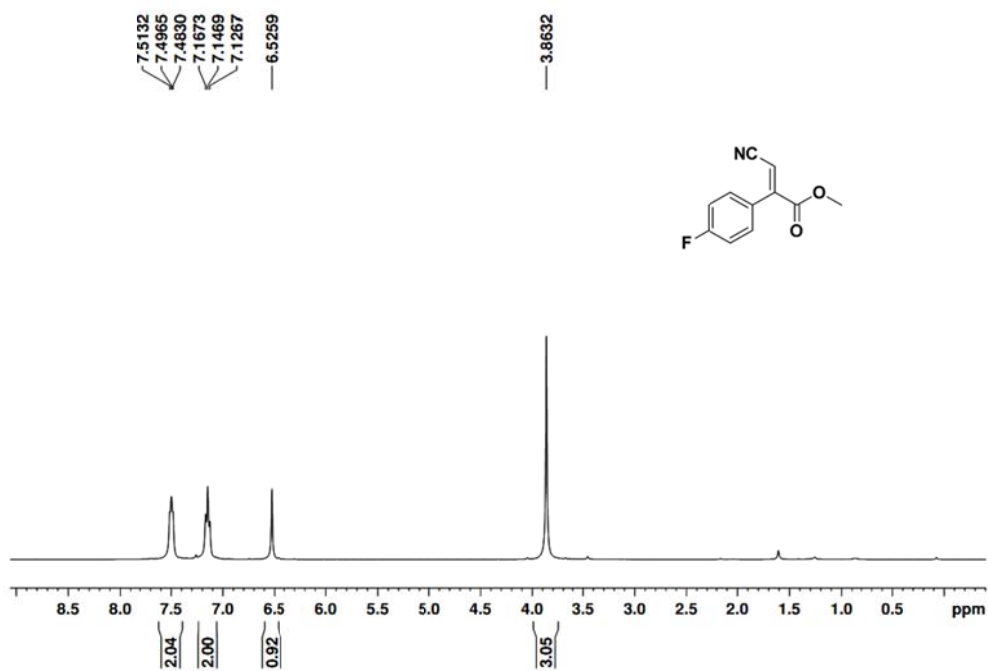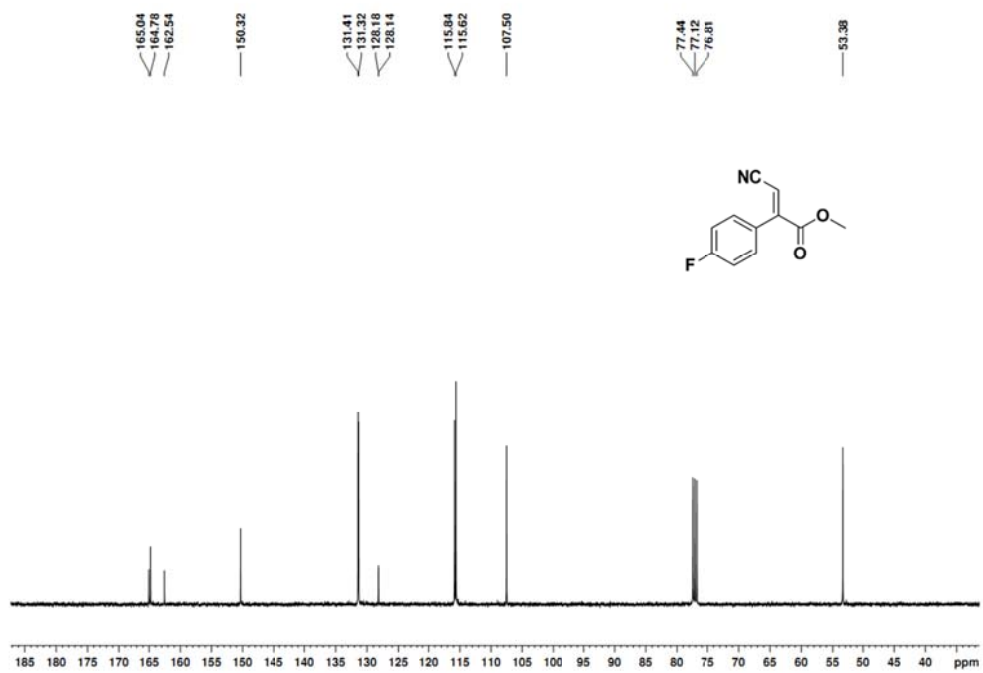

**(Z)-methyl 2-(4-chlorophenyl)-3-cyanoacrylate (1f)**

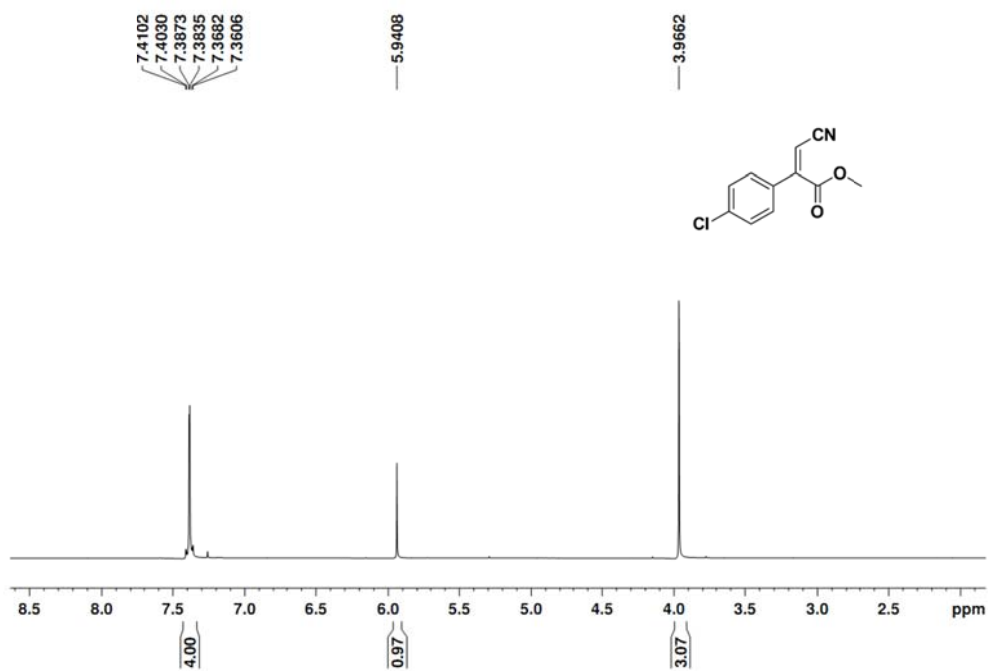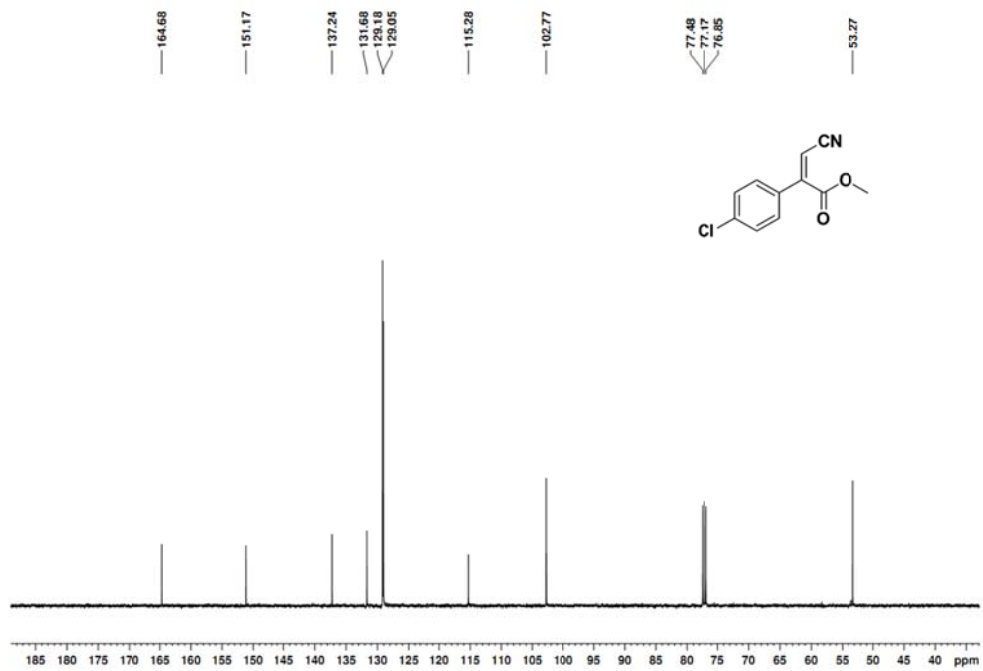

**(E)-methyl 2-(4-chlorophenyl)-3-cyanoacrylate (1f')**

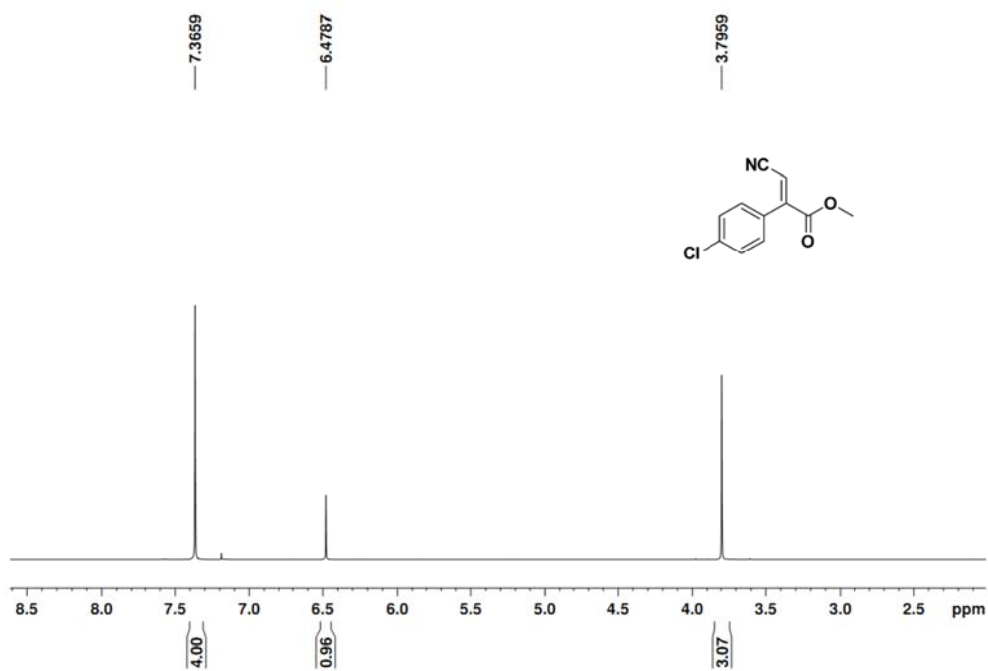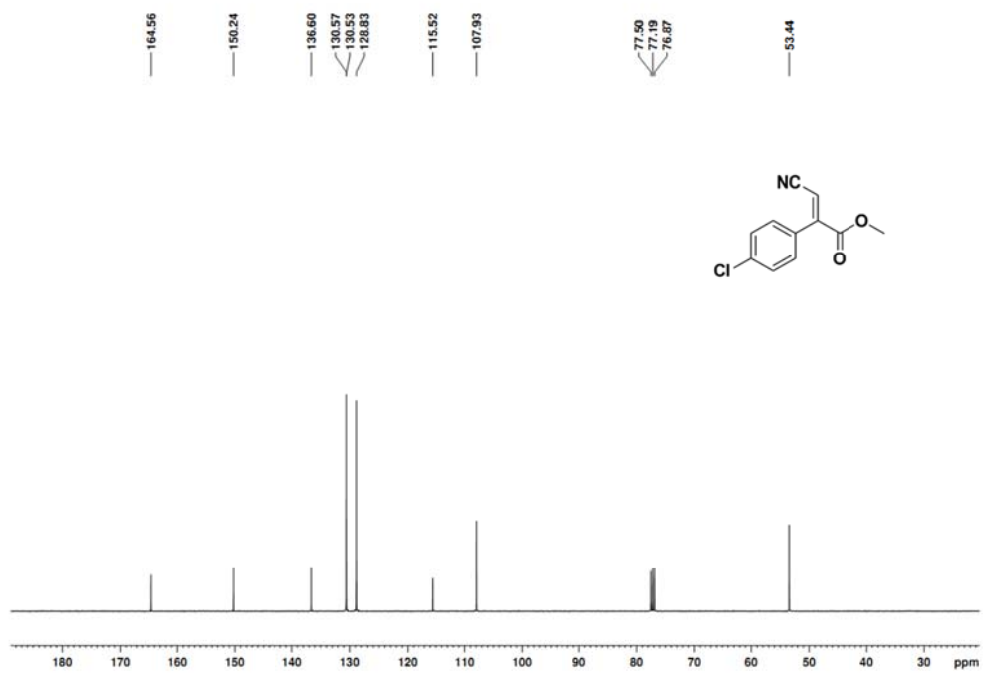



(Z)-methyl 2-(4-bromophenyl)-3-cyanoacrylate (1g)

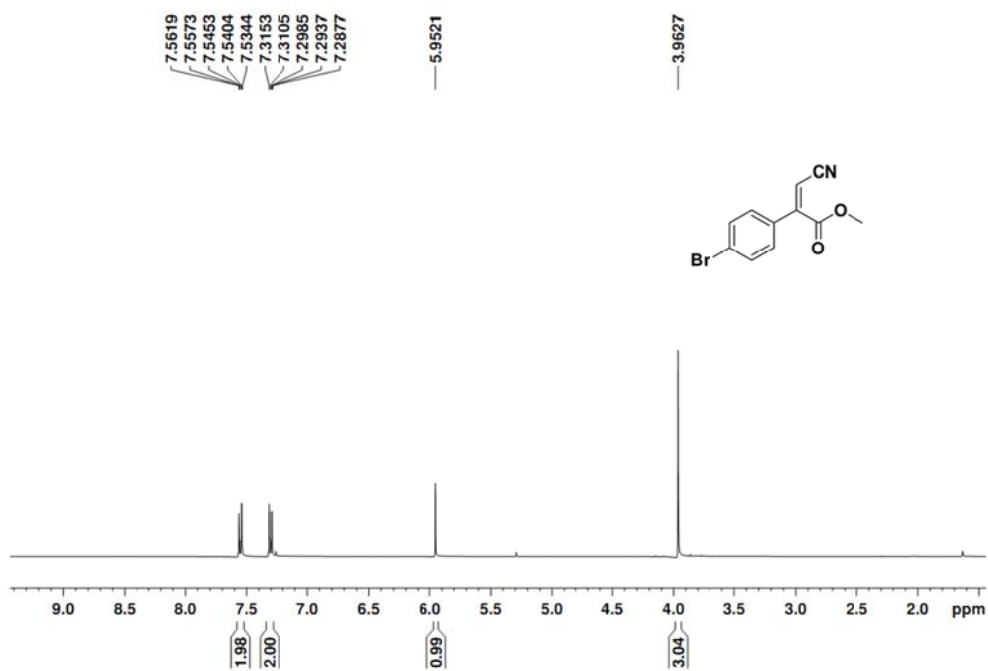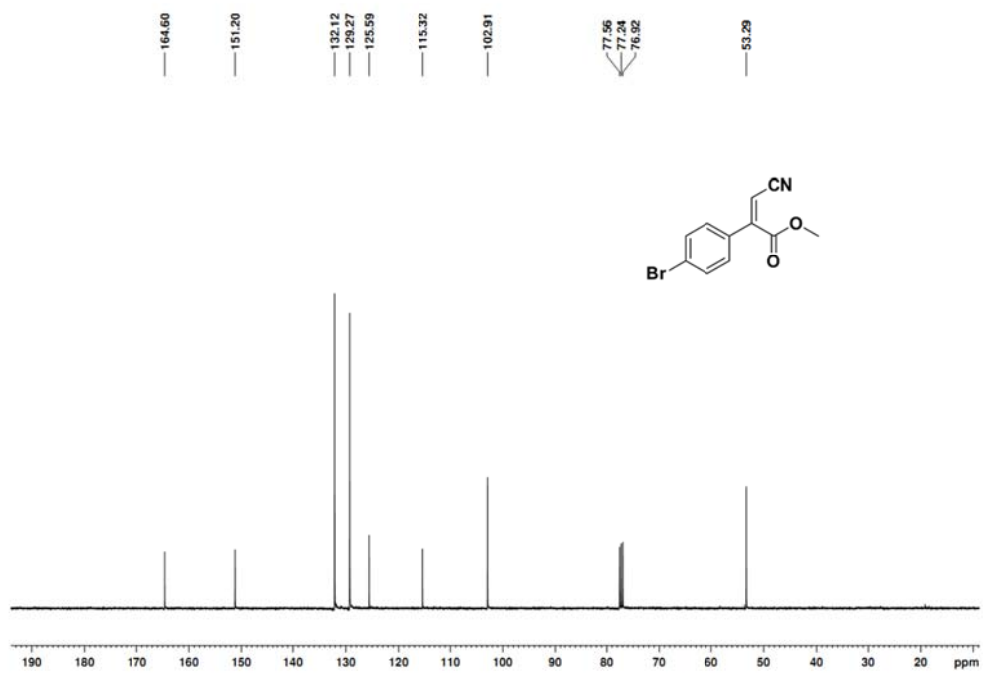

**(E)-methyl 2-(4-bromophenyl)-3-cyanoacrylate (1g')**

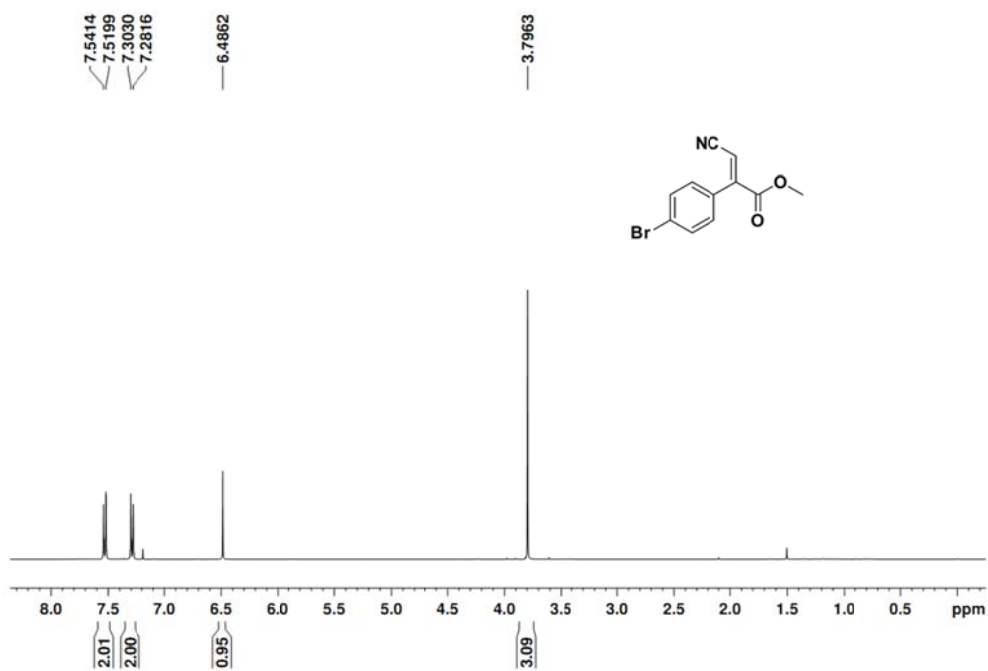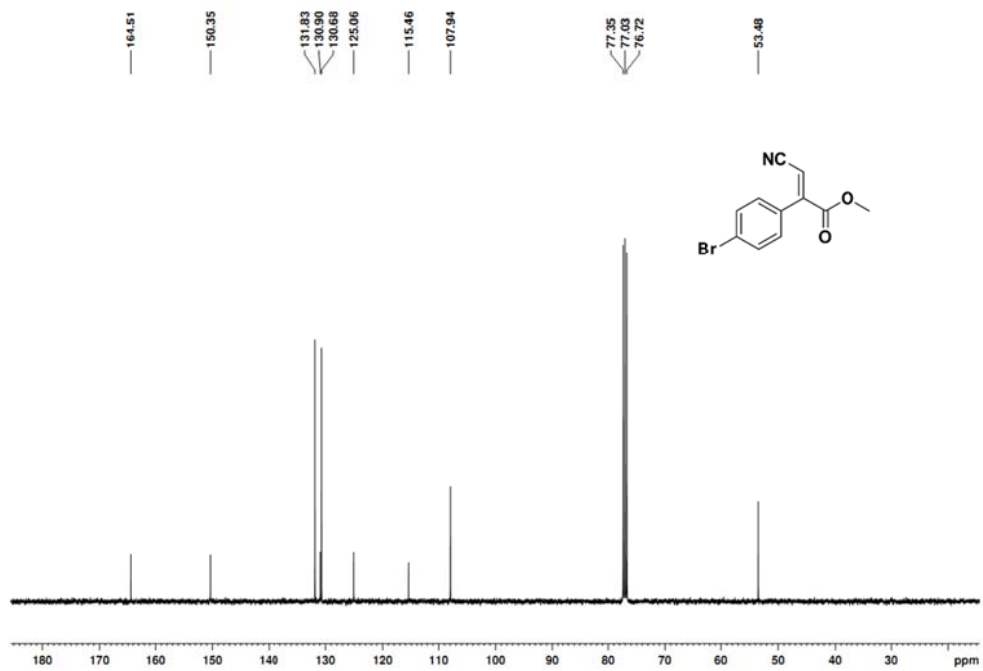

(Z)-methyl 3-cyano-2-(*m*-tolyl)acrylate (1h)

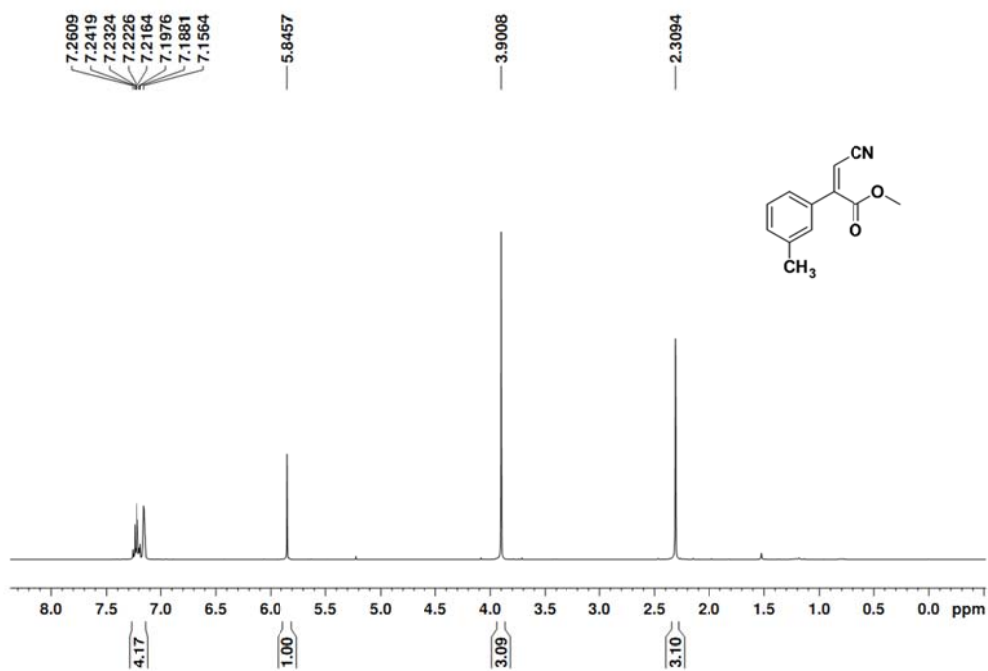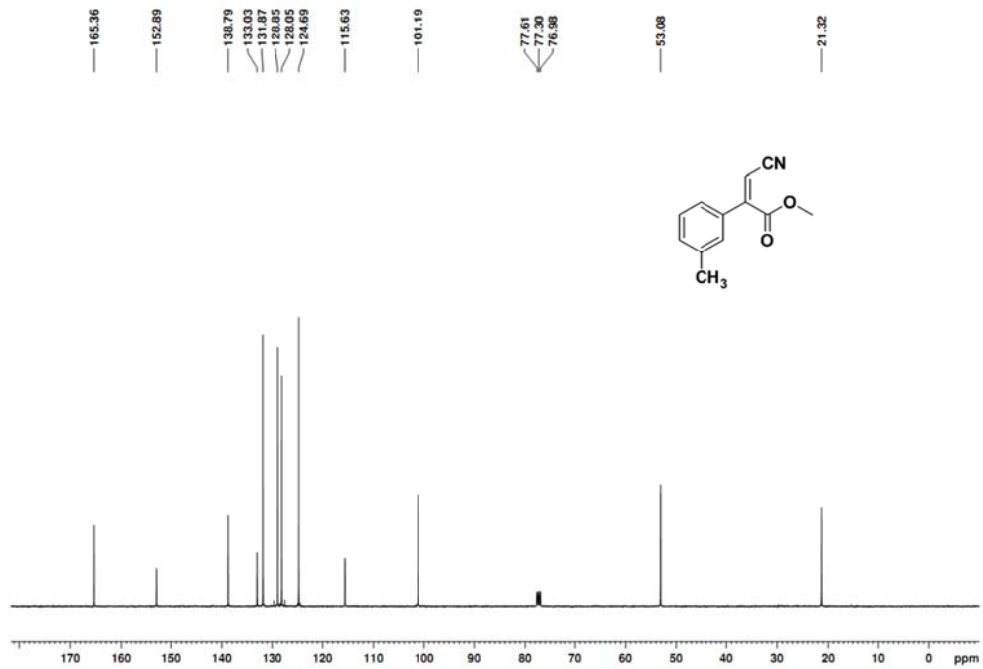

**(E)-methyl 3-cyano-2-(*m*-tolyl)acrylate (1h')**

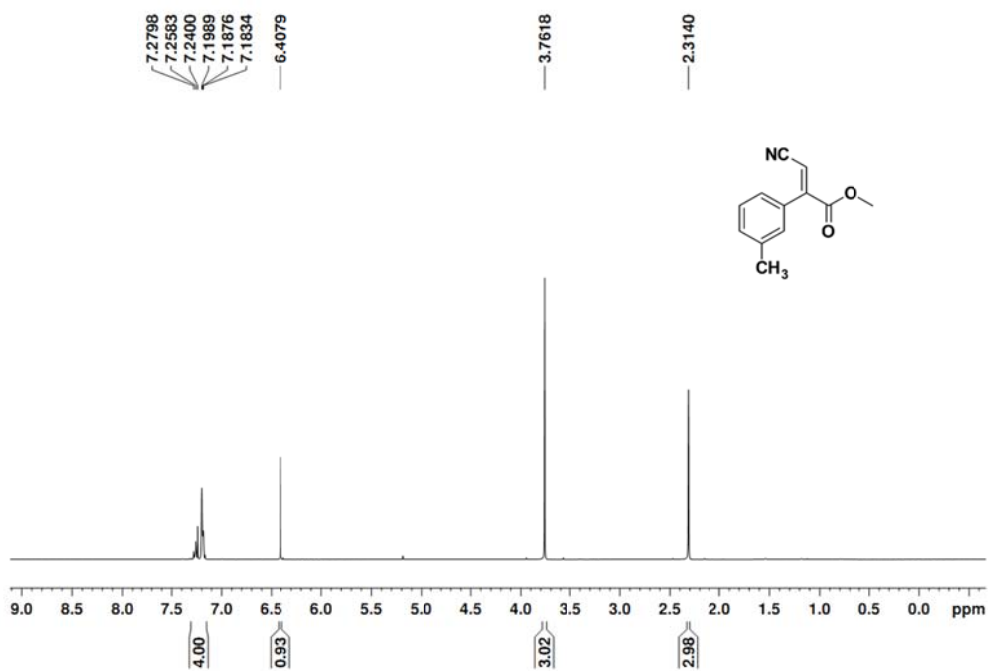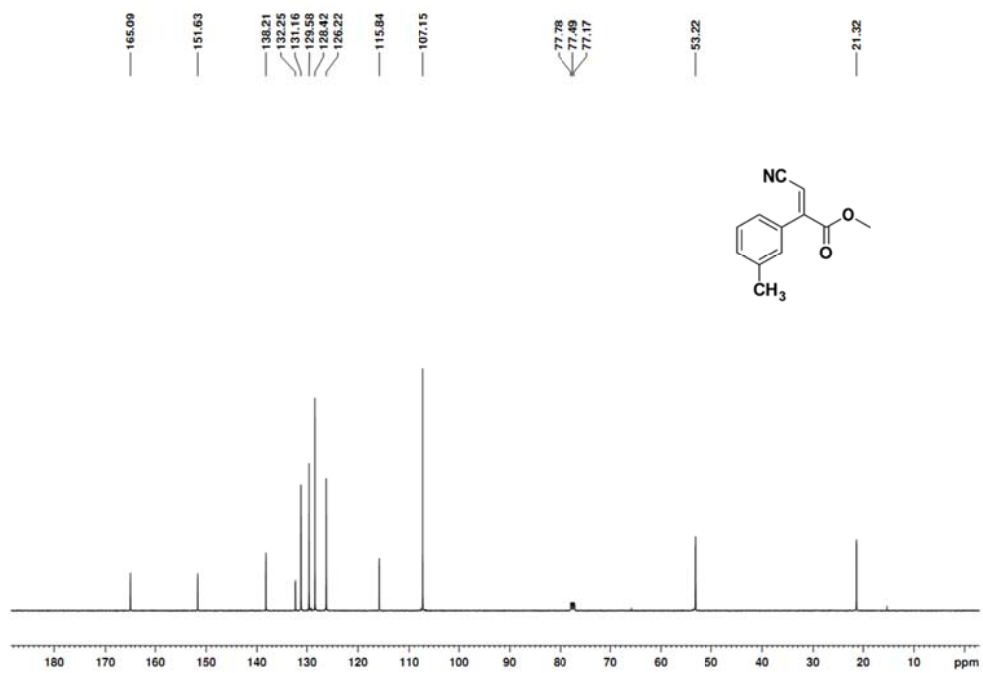

**(Z)-methyl 3-cyano-2-(3-methoxyphenyl)acrylate (1i)**

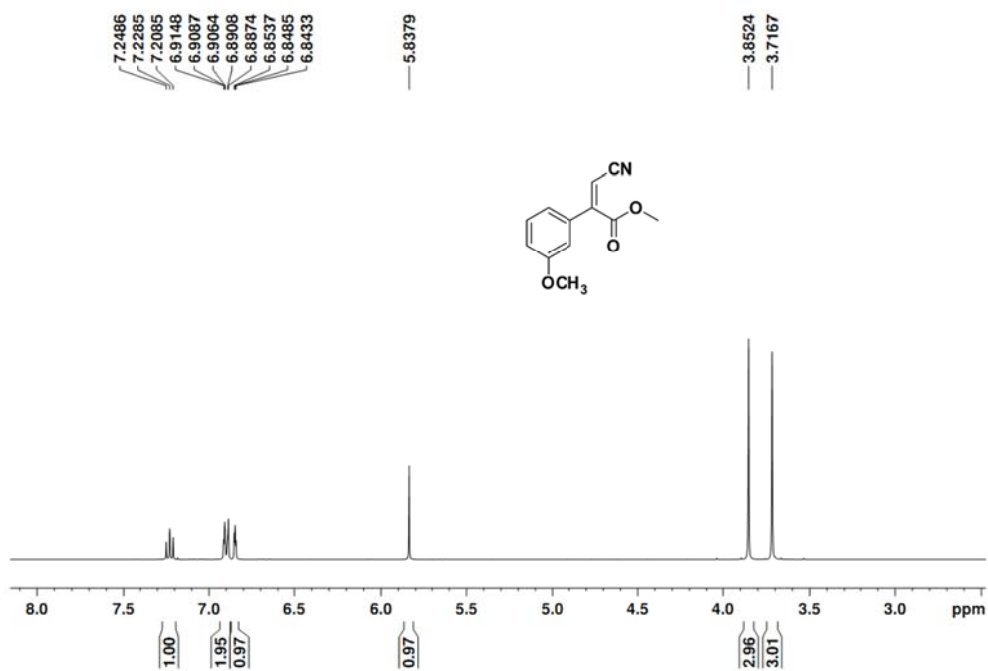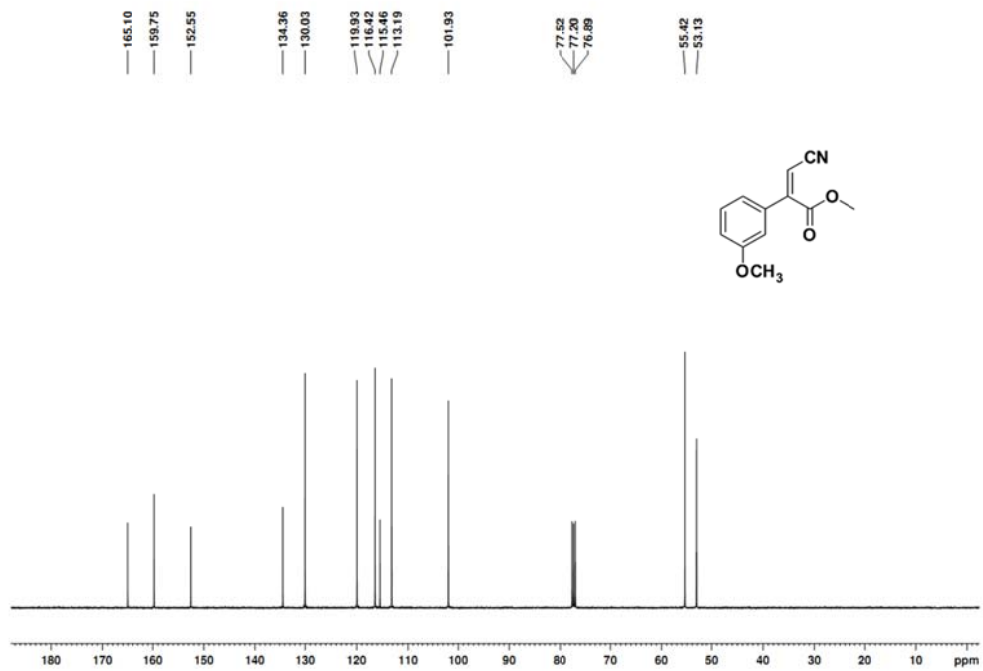

**(E)-methyl 3-cyano-2-(3-methoxyphenyl)acrylate (1i')**

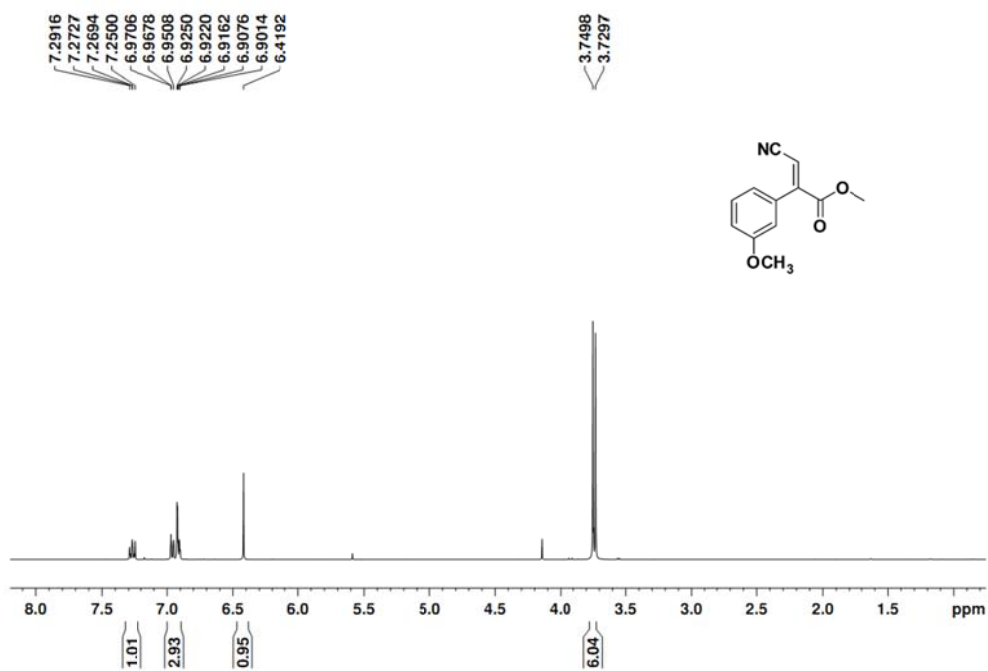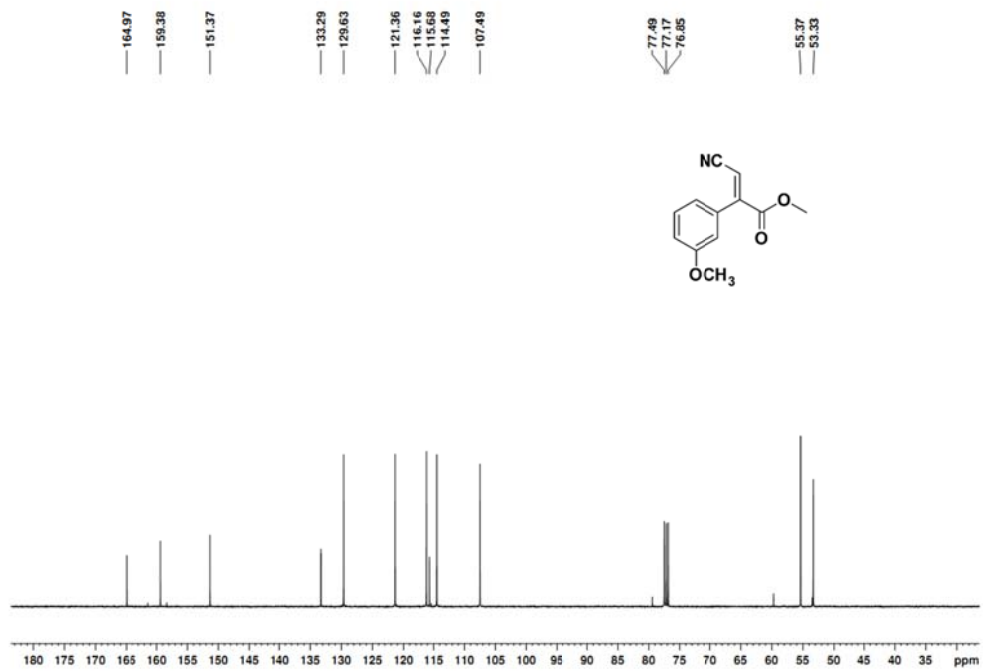

**(Z)-methyl 3-cyano-2-(3-fluorophenyl)acrylate (1j)**

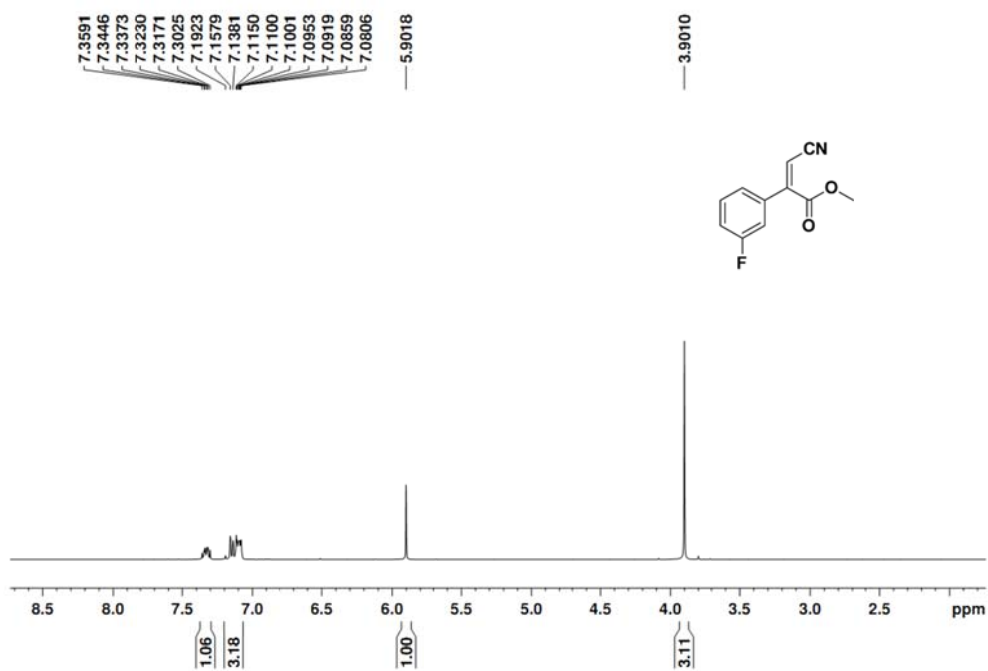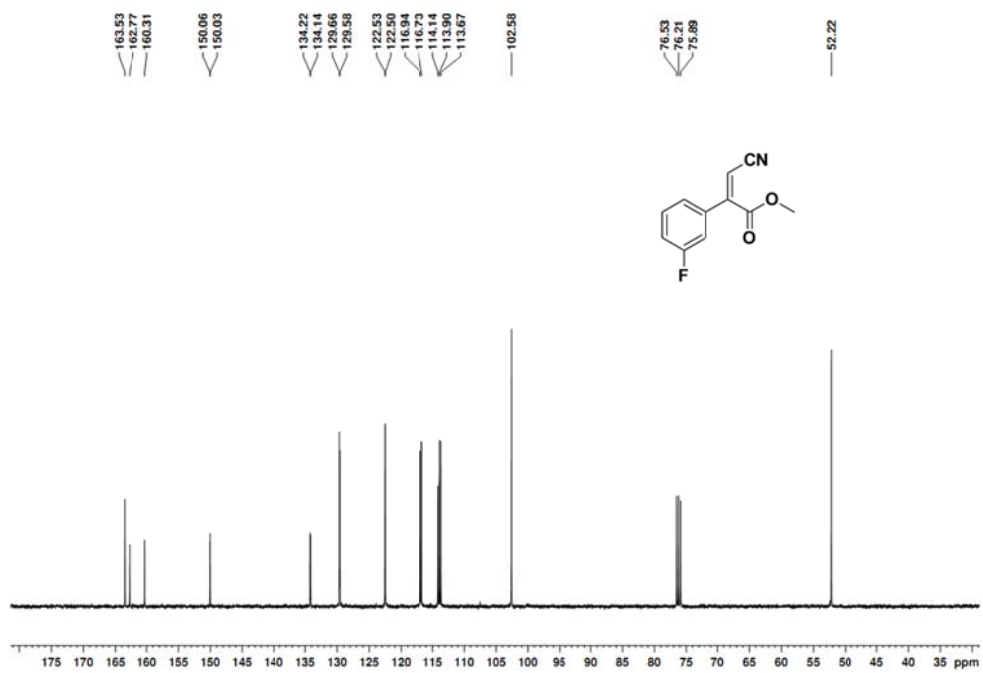

**(E)-methyl 3-cyano-2-(3-fluorophenyl)acrylate (1j')**

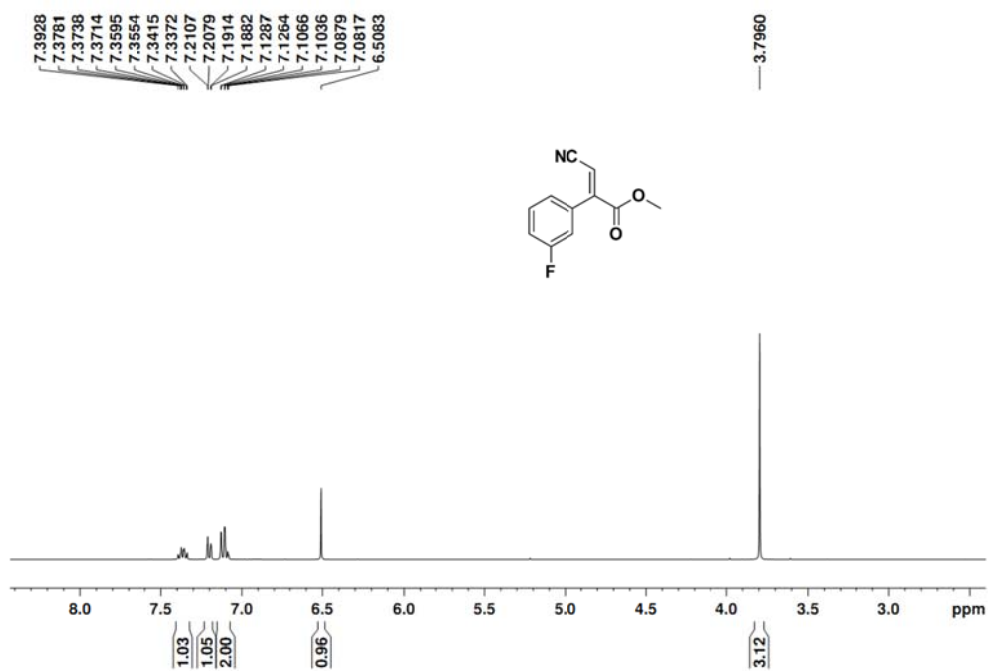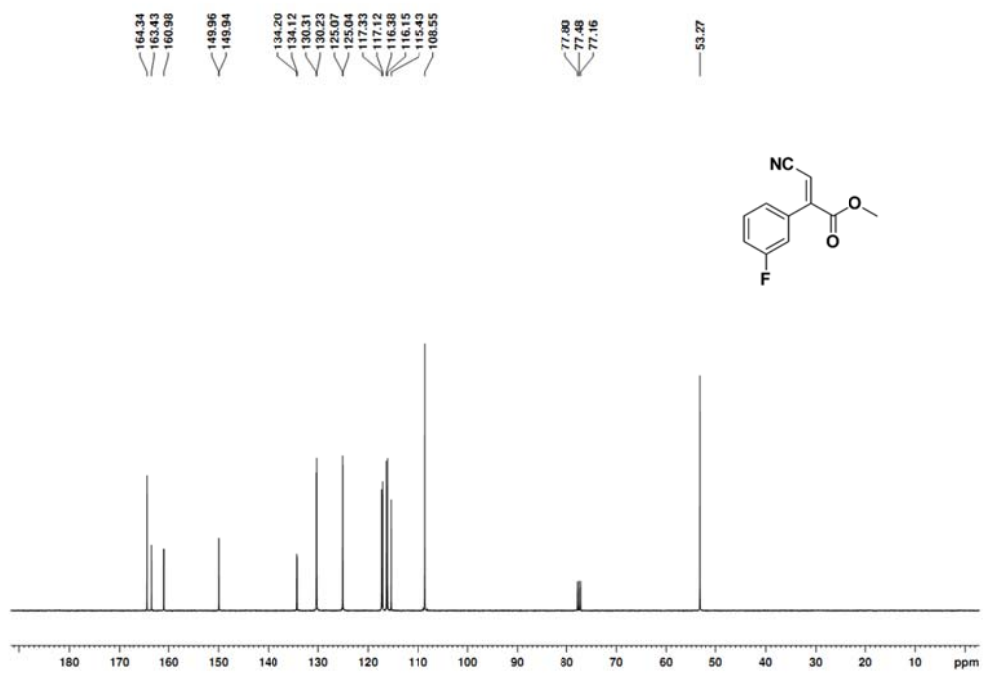



(Z)-methyl 3-cyano-2-(*o*-tolyl)acrylate (1k)

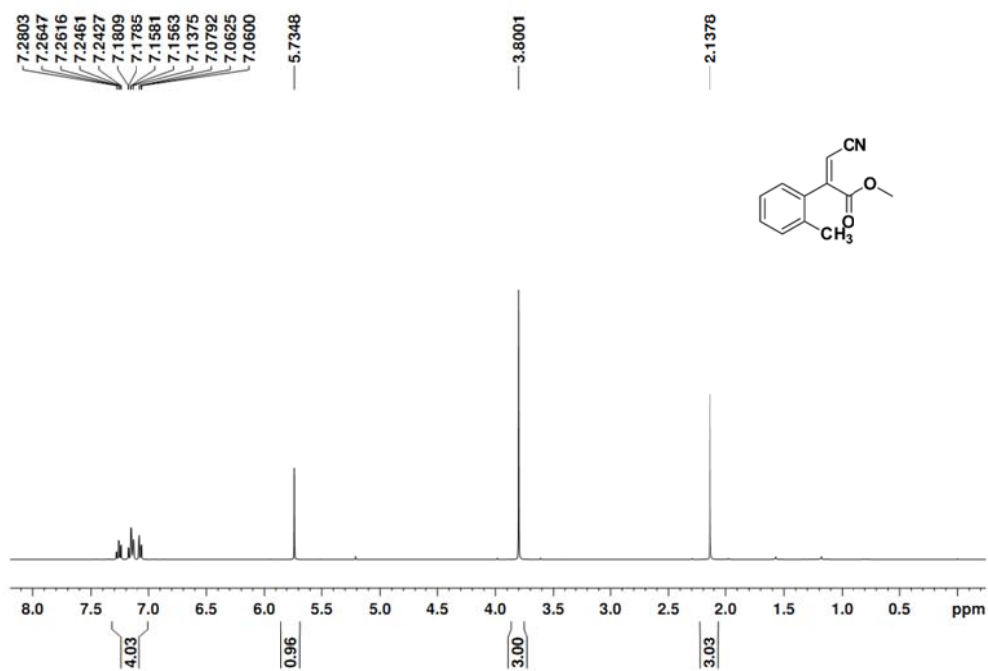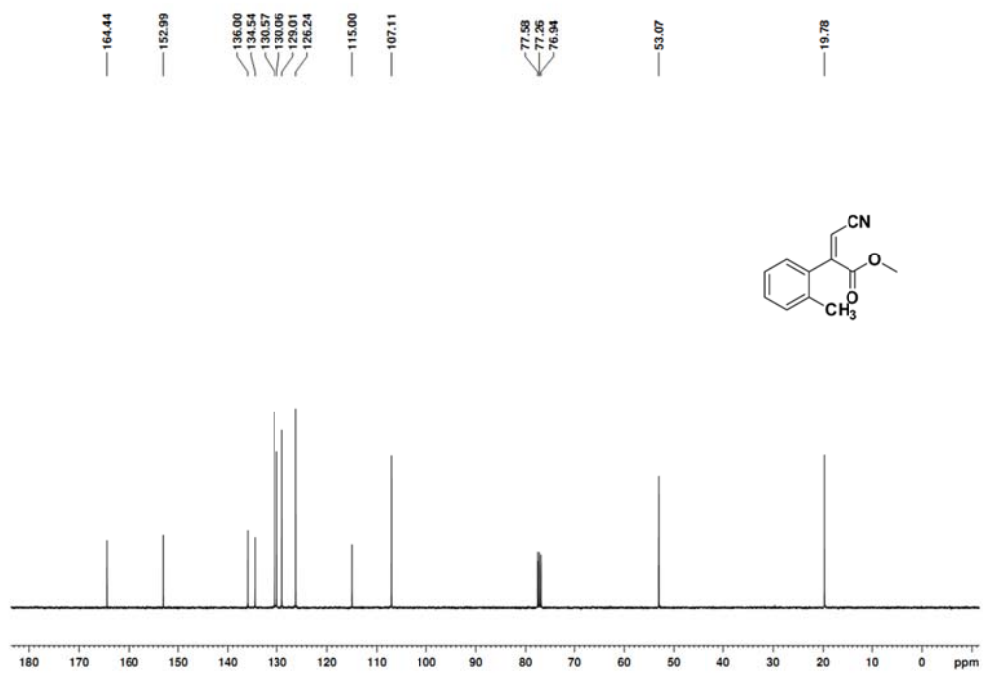

**(E)-methyl 3-cyano-2-(*o*-tolyl)acrylate (1k')**

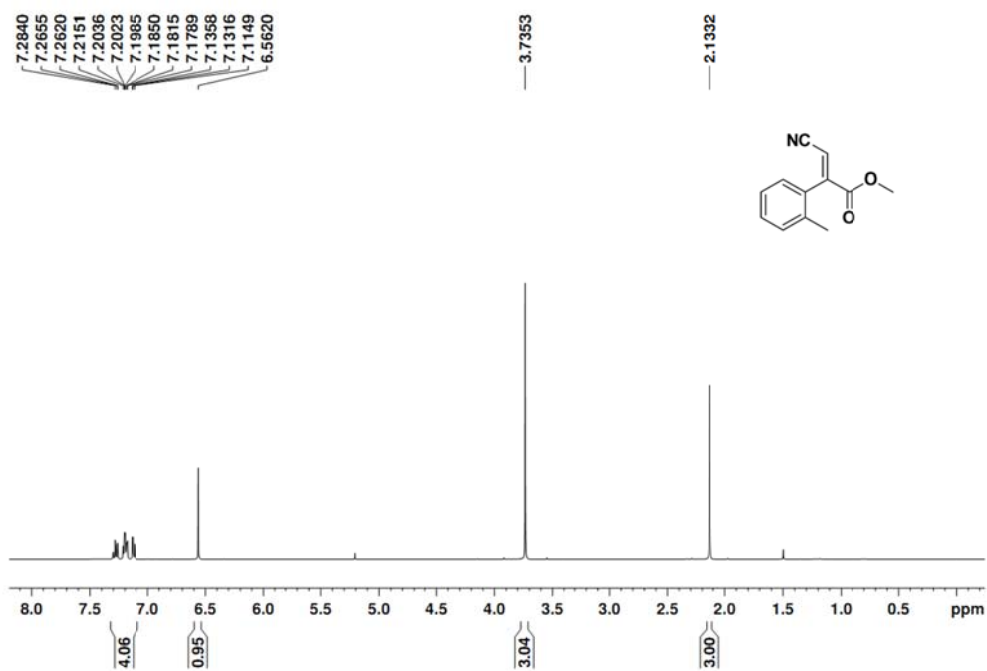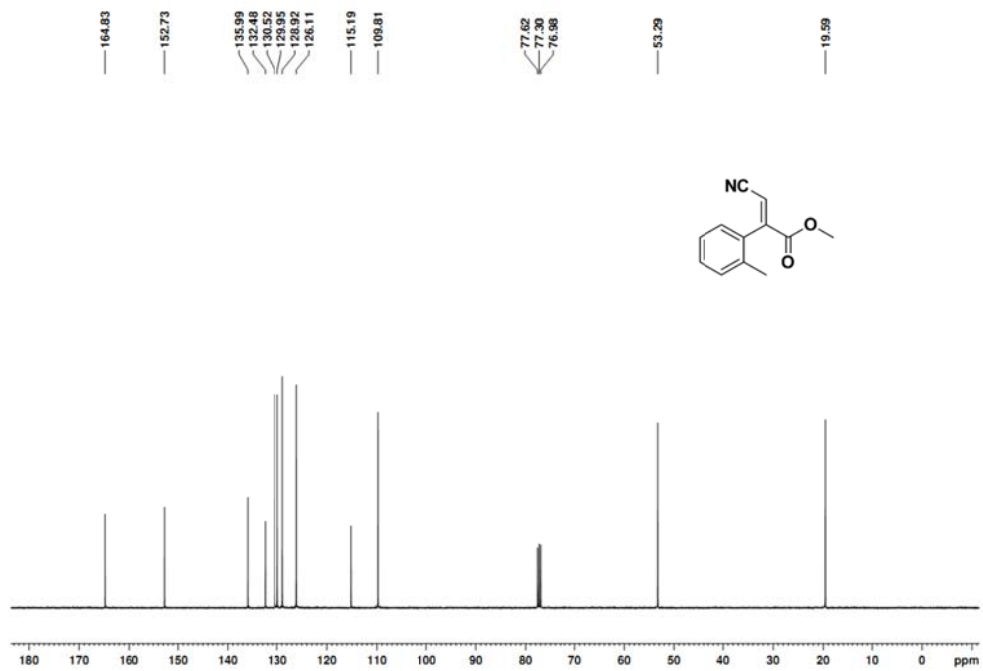

**(Z)-methyl 3-cyano-2-(2-methoxyphenyl)acrylate (1I)**

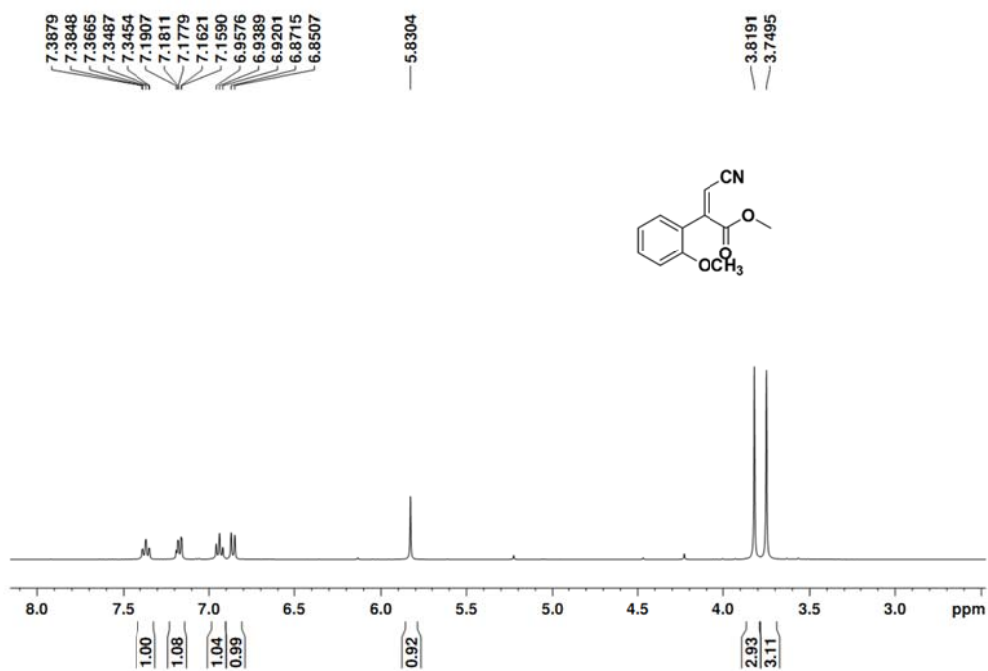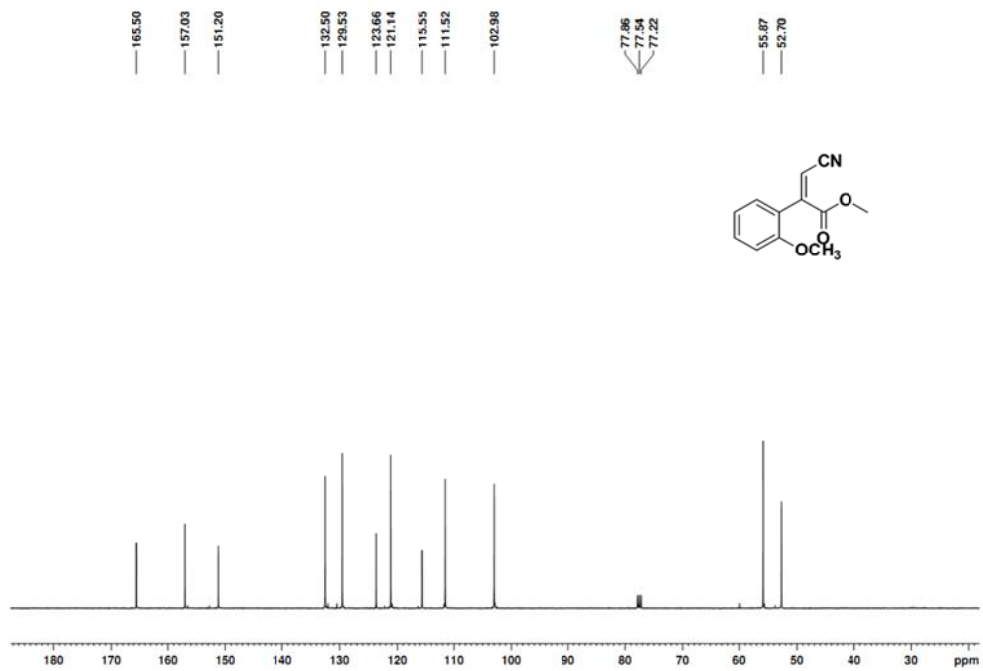

**(E)-methyl 3-cyano-2-(2-methoxyphenyl)acrylate (11')**

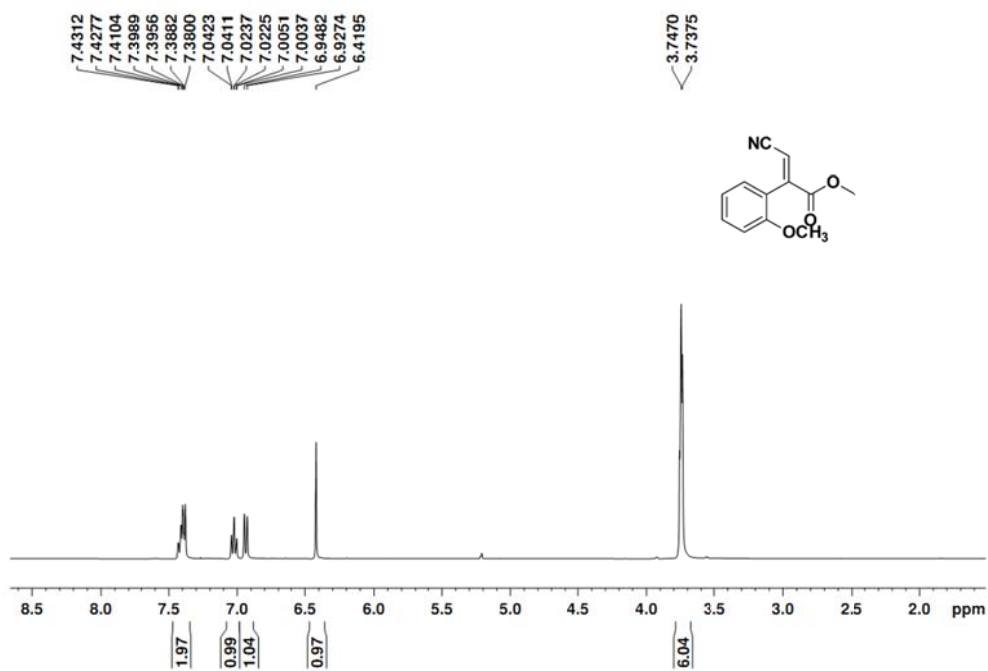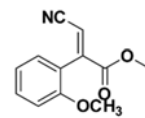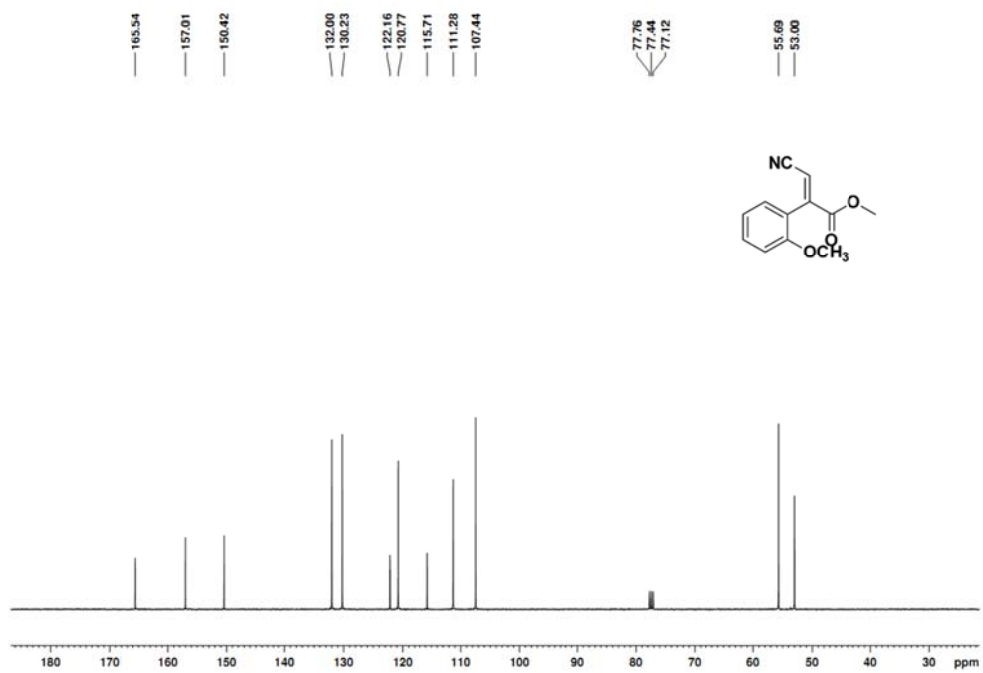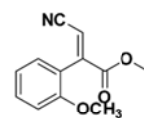

**(Z)-methyl 3-cyano-2-(naphthalen-1-yl)acrylate (1m)**

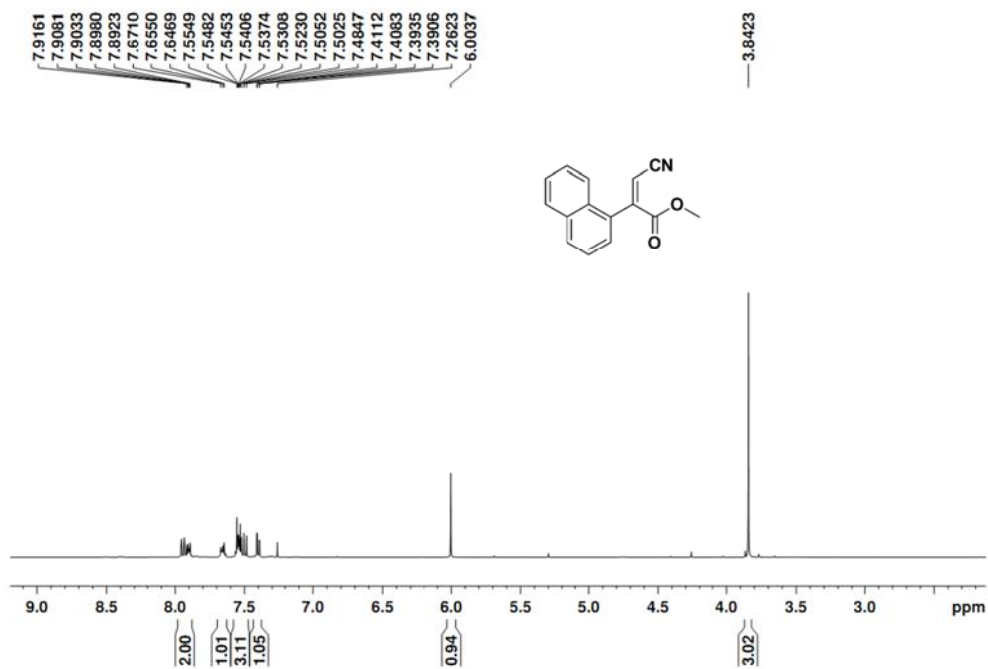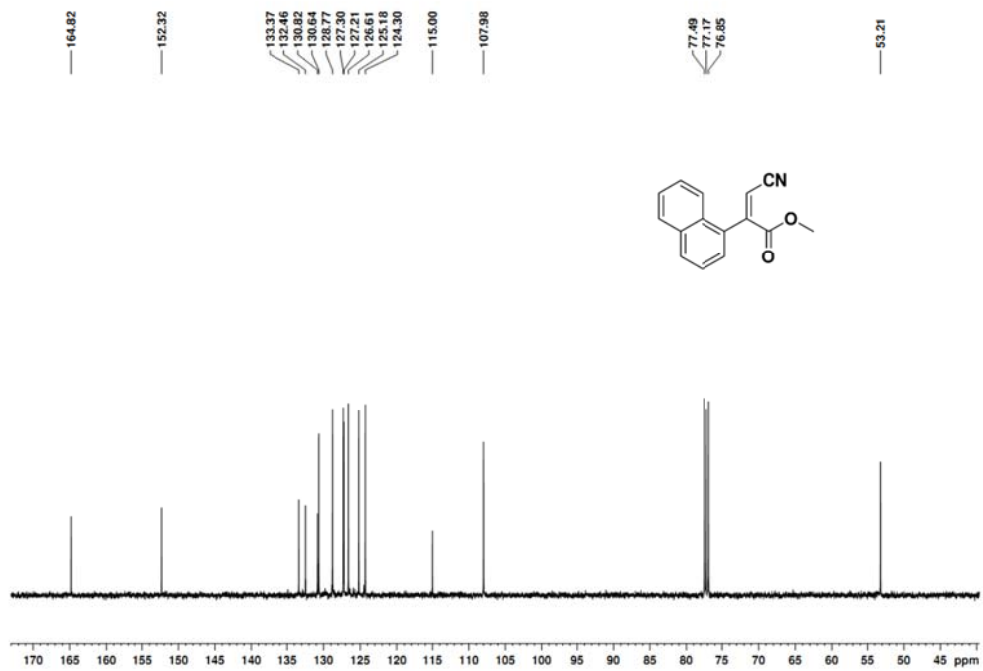

**(E)-methyl 3-cyano-2-(naphthalen-1-yl)acrylate (1m')**

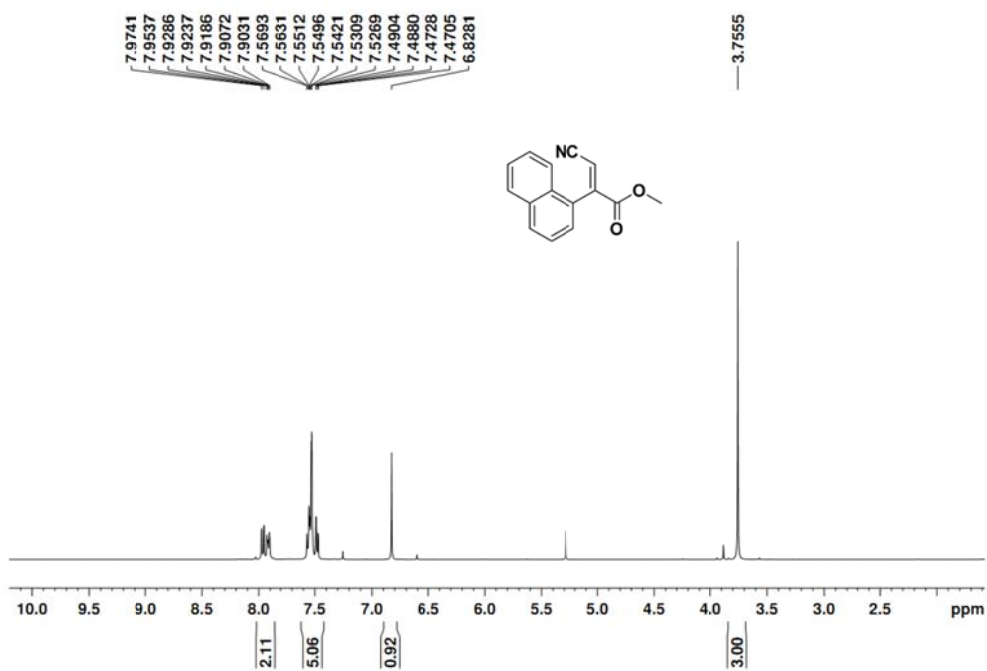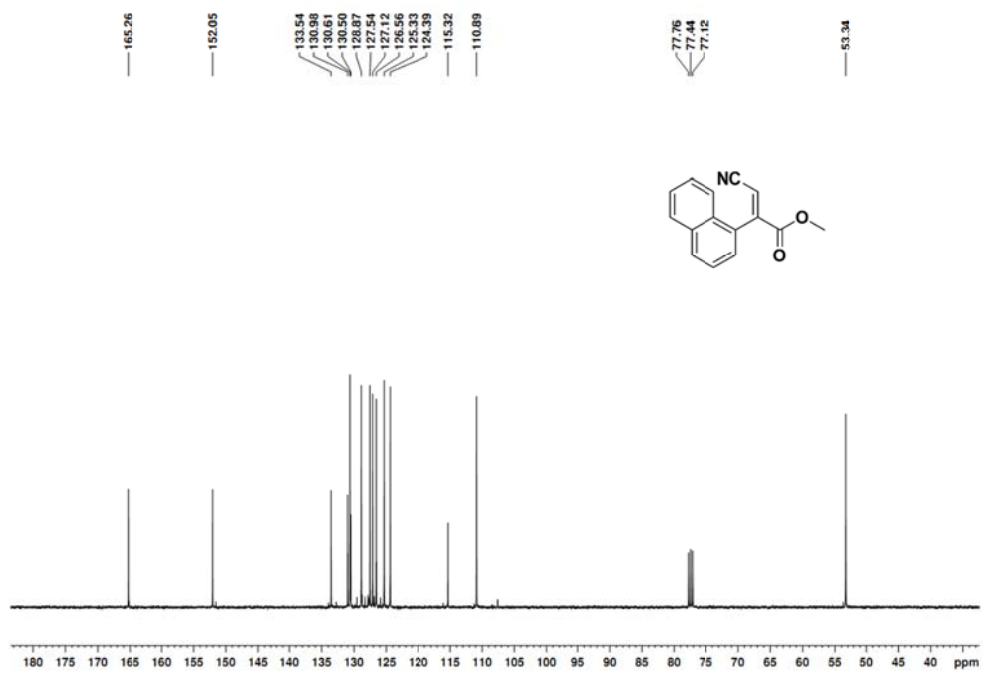

**(Z)-methyl 3-cyano-2-(naphthalen-2-yl)acrylate (1n)**

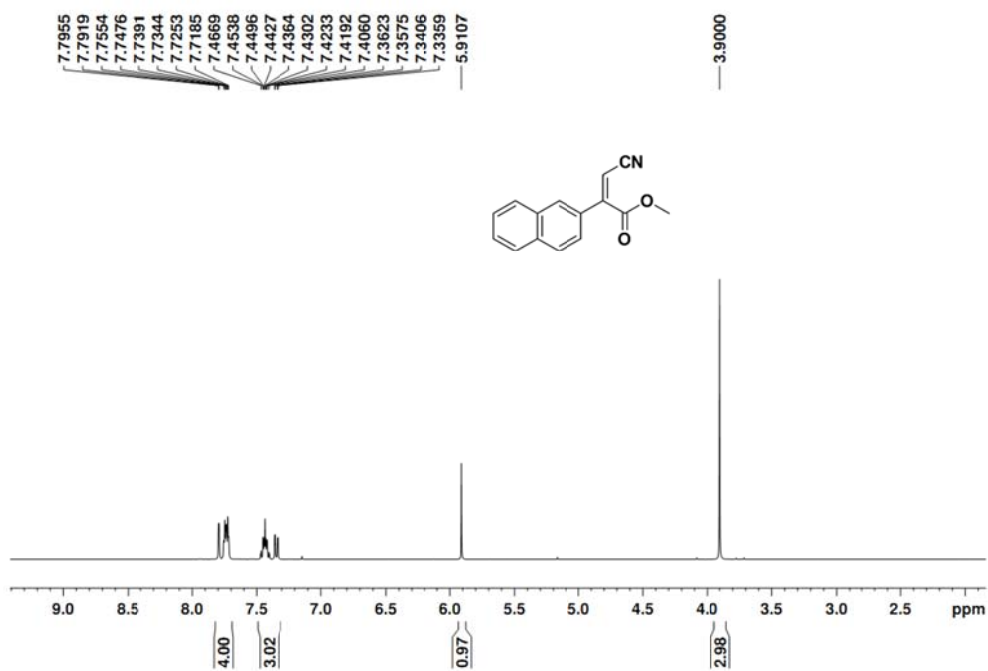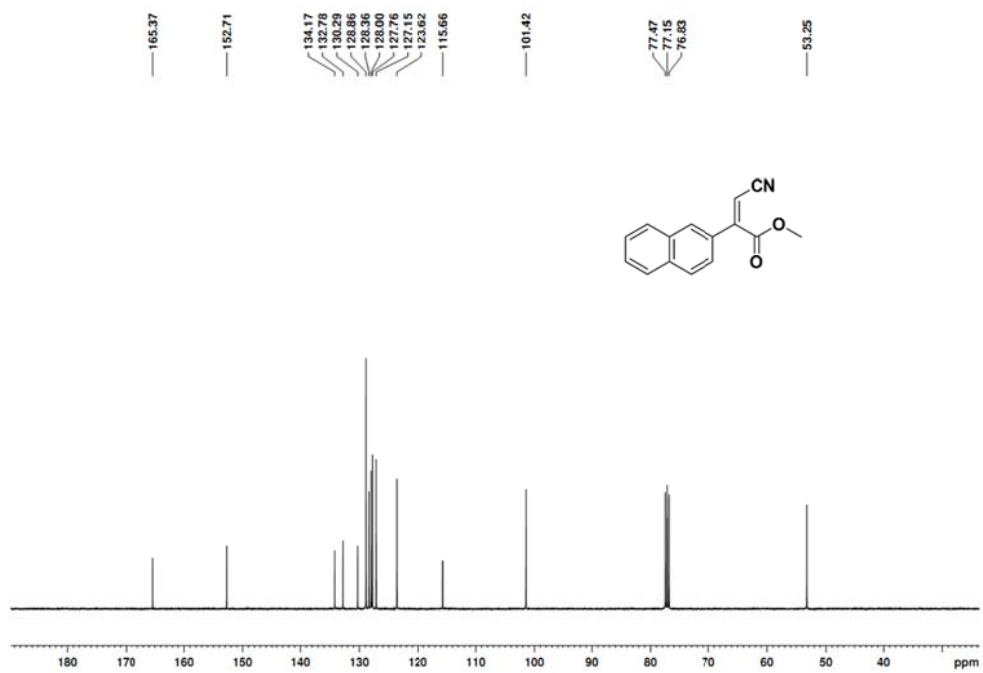

**(E)-methyl 3-cyano-2-(naphthalen-2-yl)acrylate (1n')**

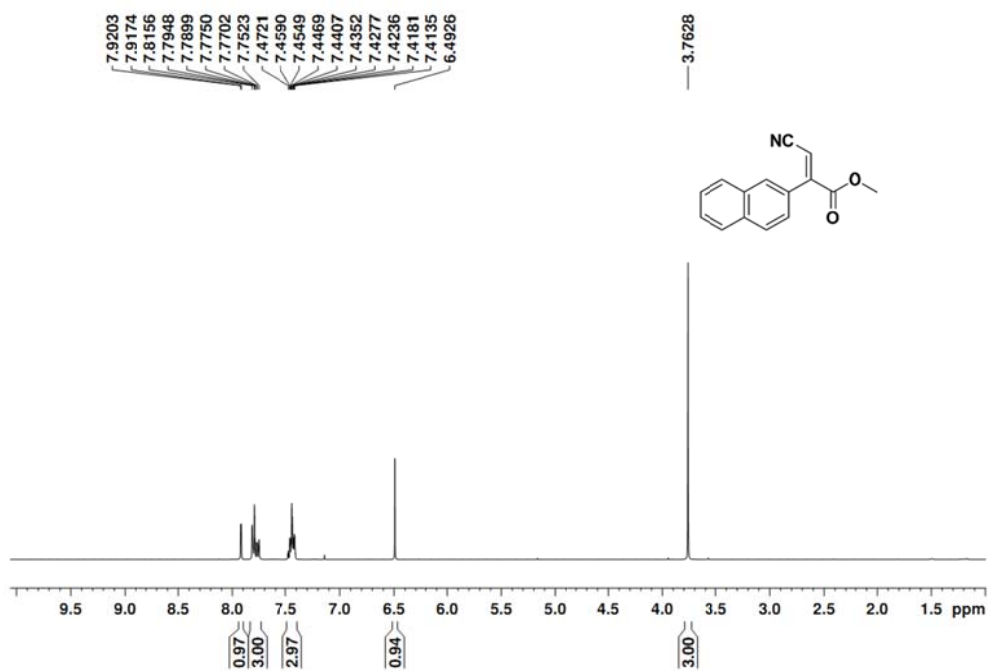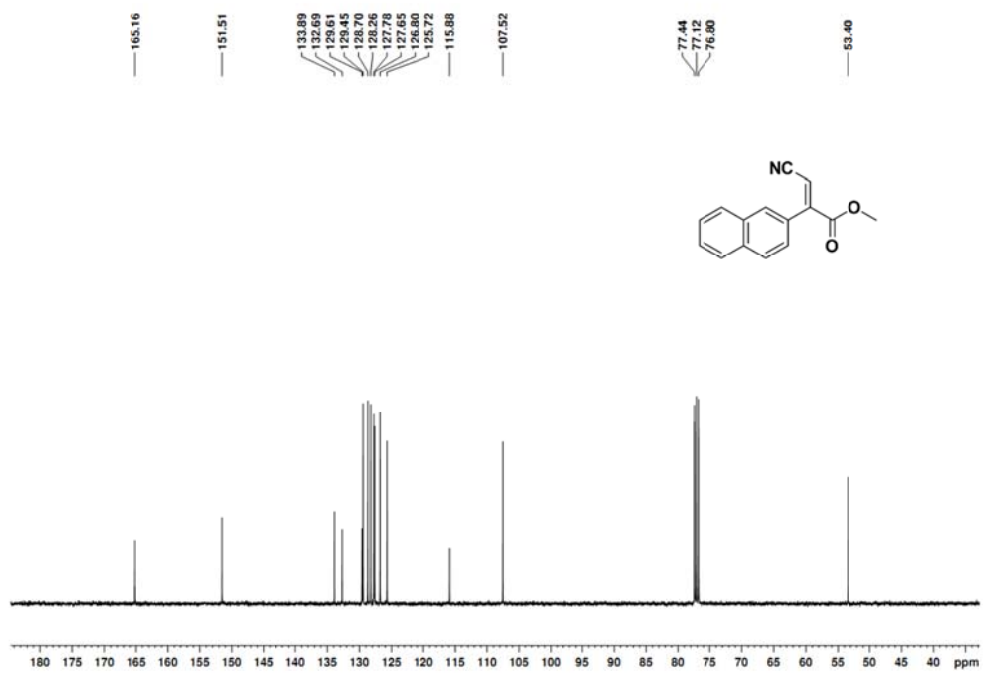



**(Z)-methyl 2-(cyanomethylene)-3-methylbutanoate (1o)**

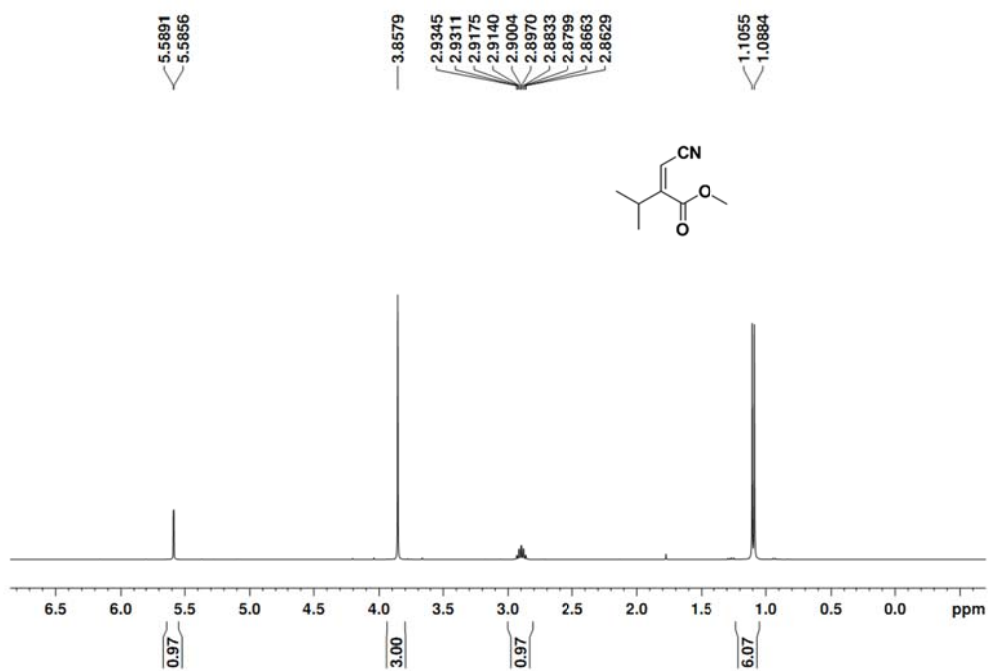

**(E)-methyl 2-(cyanomethylene)-3-methylbutanoate (1o')**

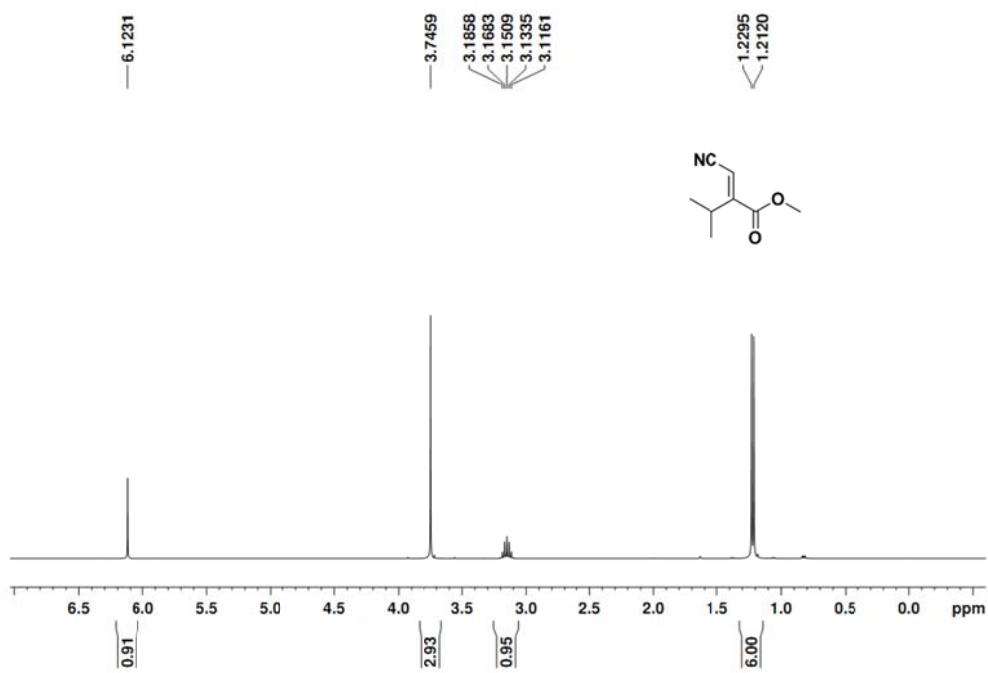

**(Z)-methyl 3-cyano-2-cyclohexylacrylate (1p)**

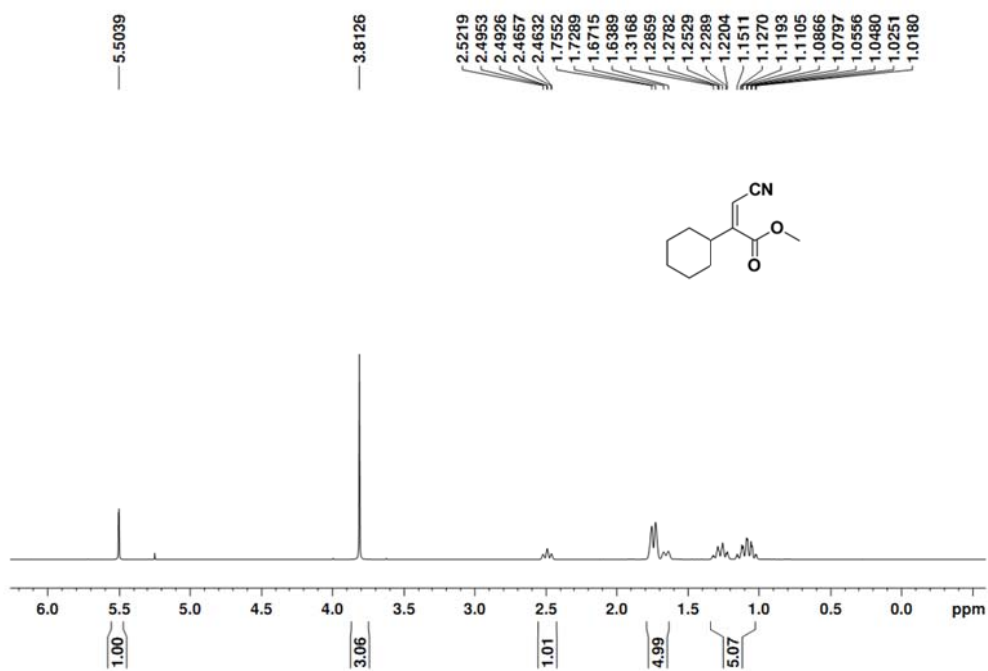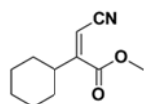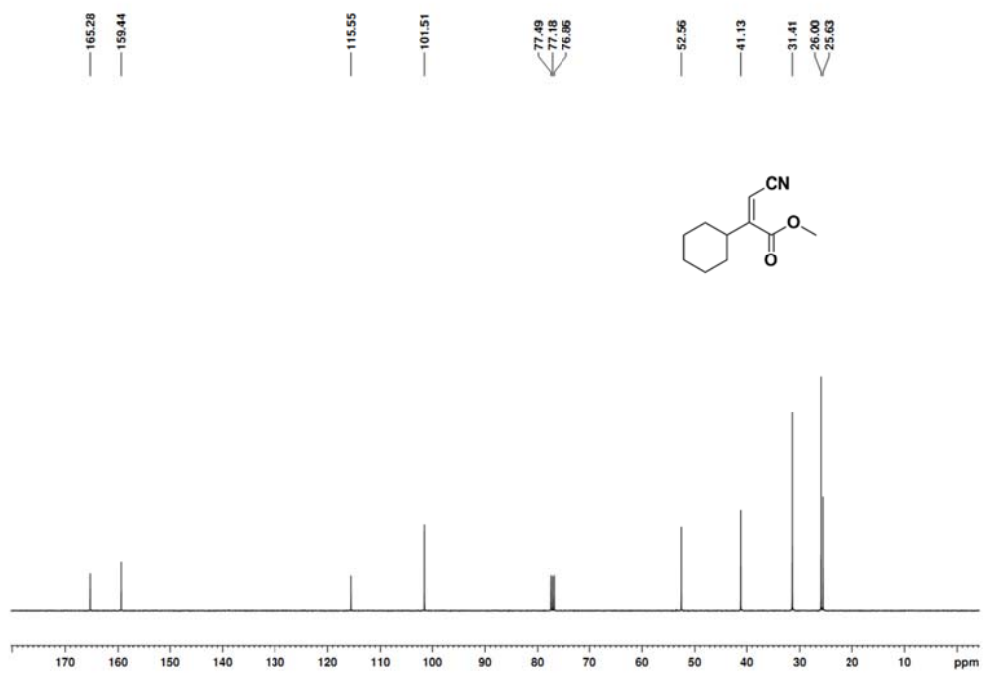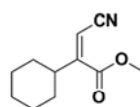

**(E)-methyl 3-cyano-2-cyclohexylacrylate (1p')**

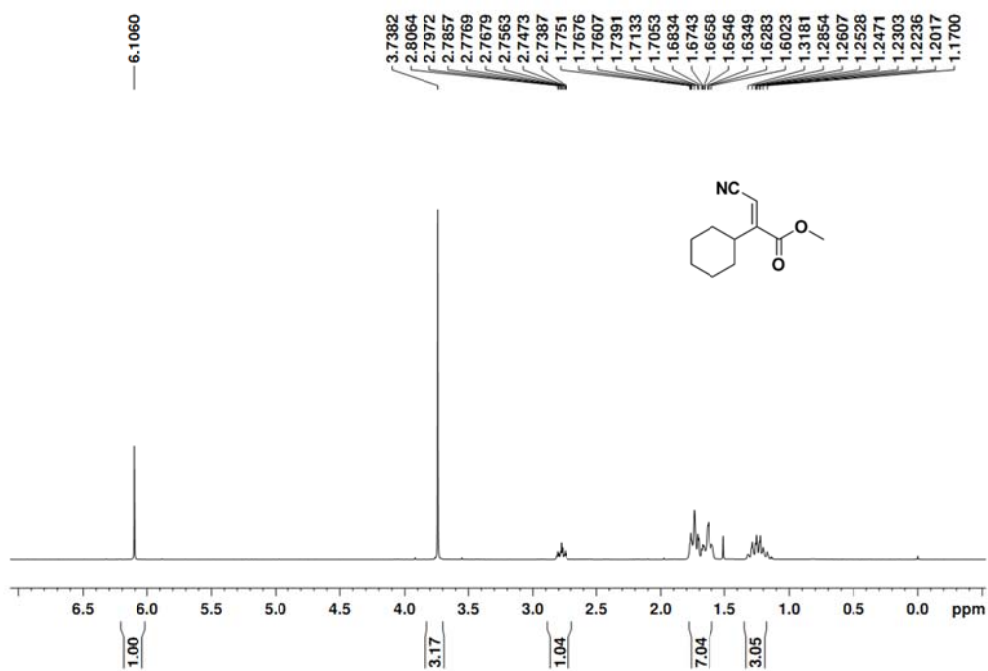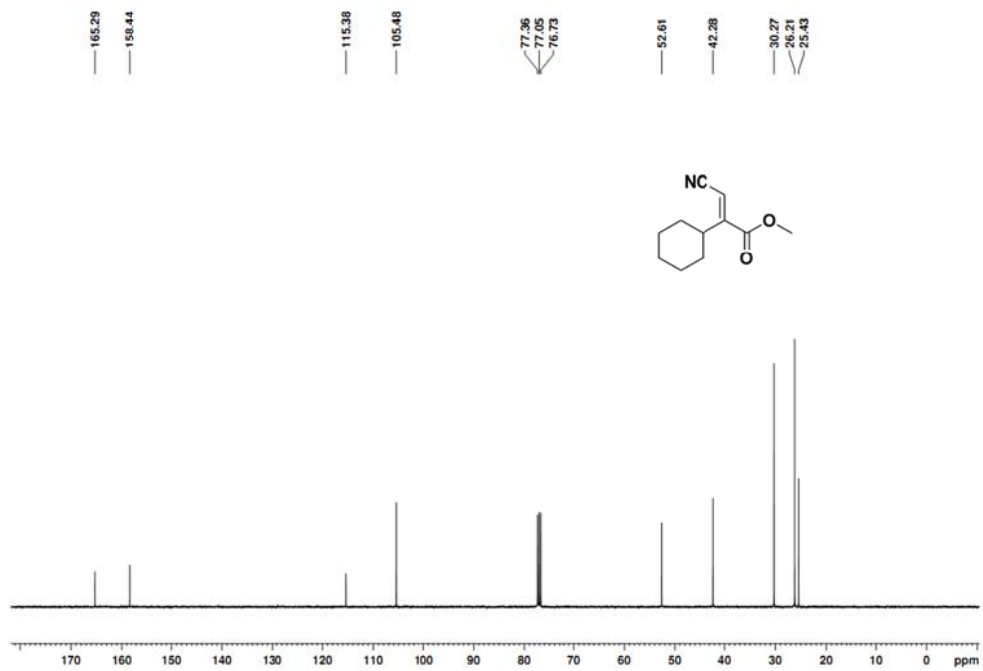

**(E)-4-oxo-3,4-diphenylbut-2-enitrile (3a)**

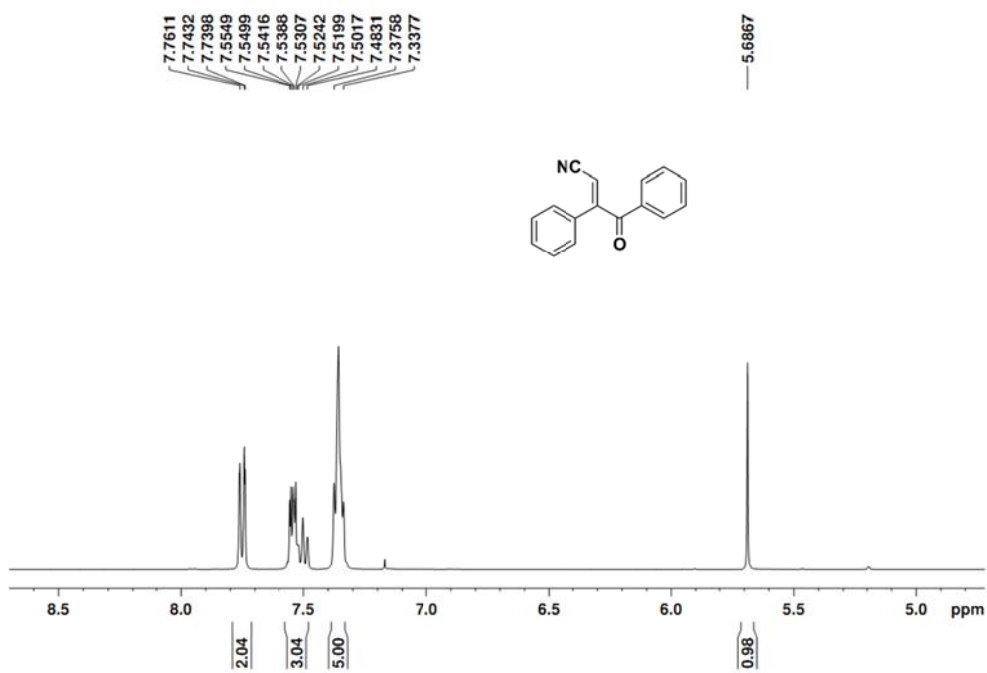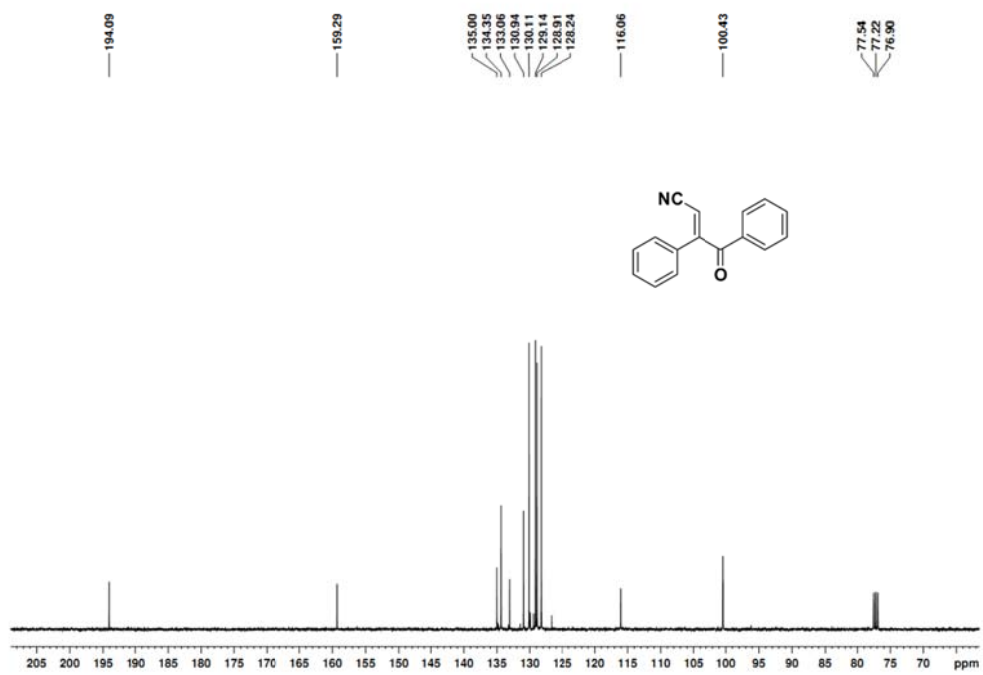

**(E)-3,4-bis(2-methoxyphenyl)-4-oxobut-2-enitrile (3b)**

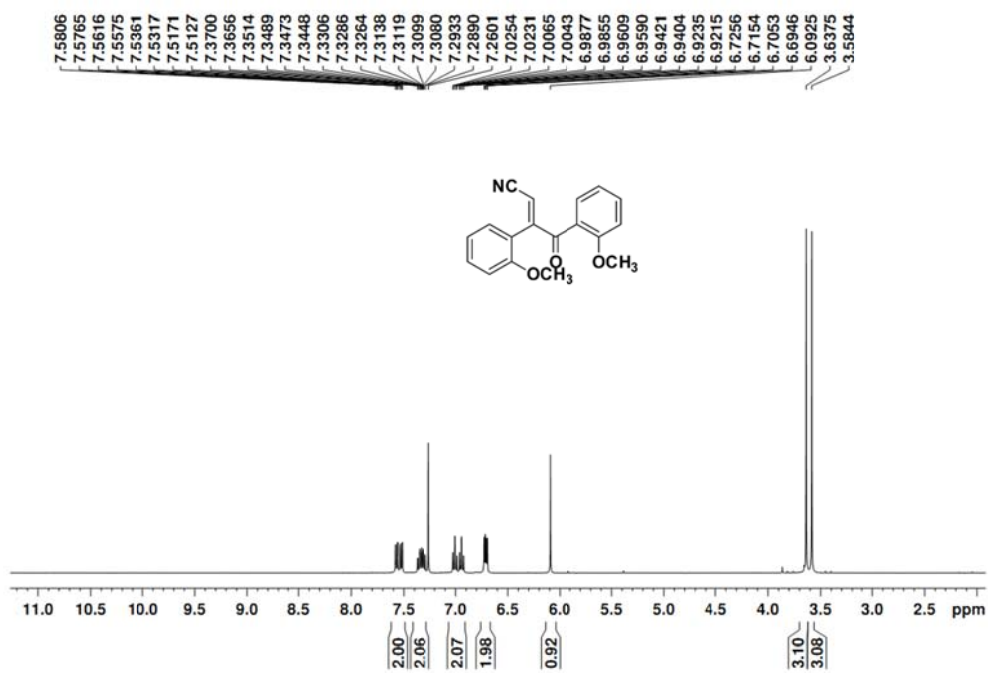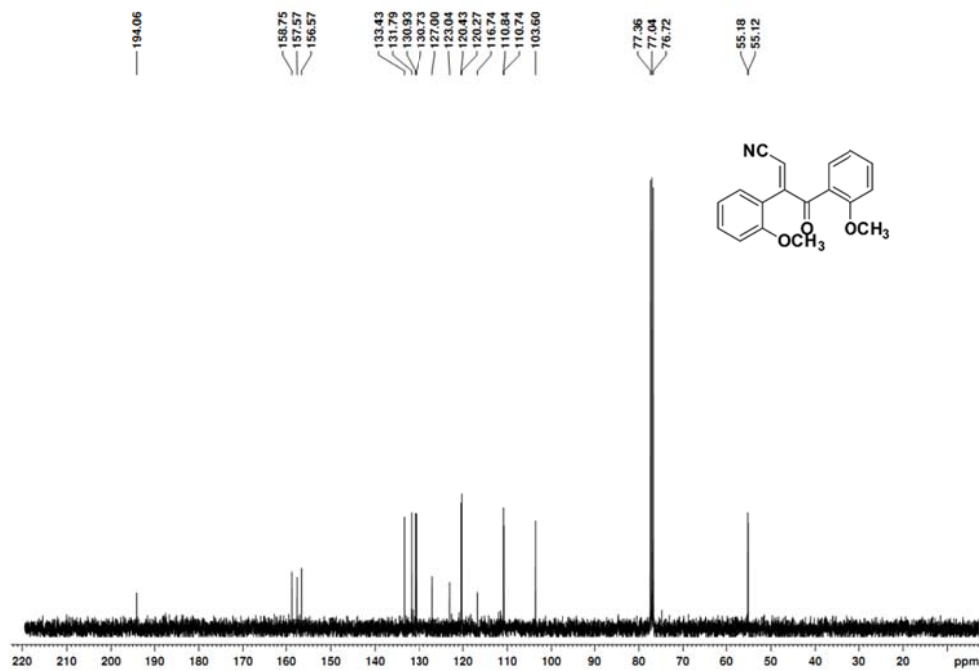

**(E)-4-oxo-3,4-di-*m*-tolylbut-2-enitrile (3c)**

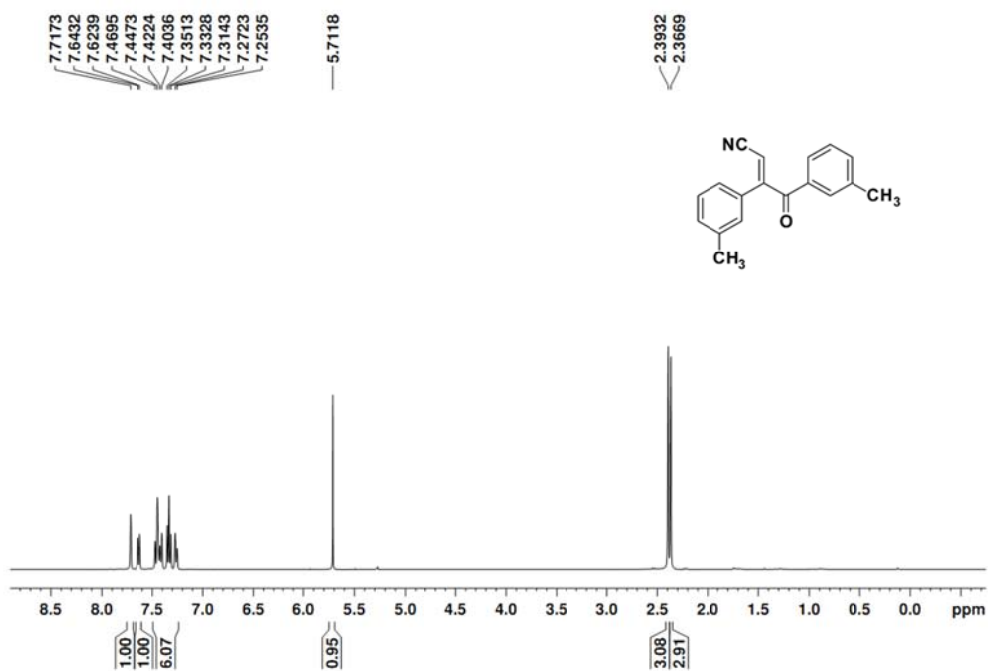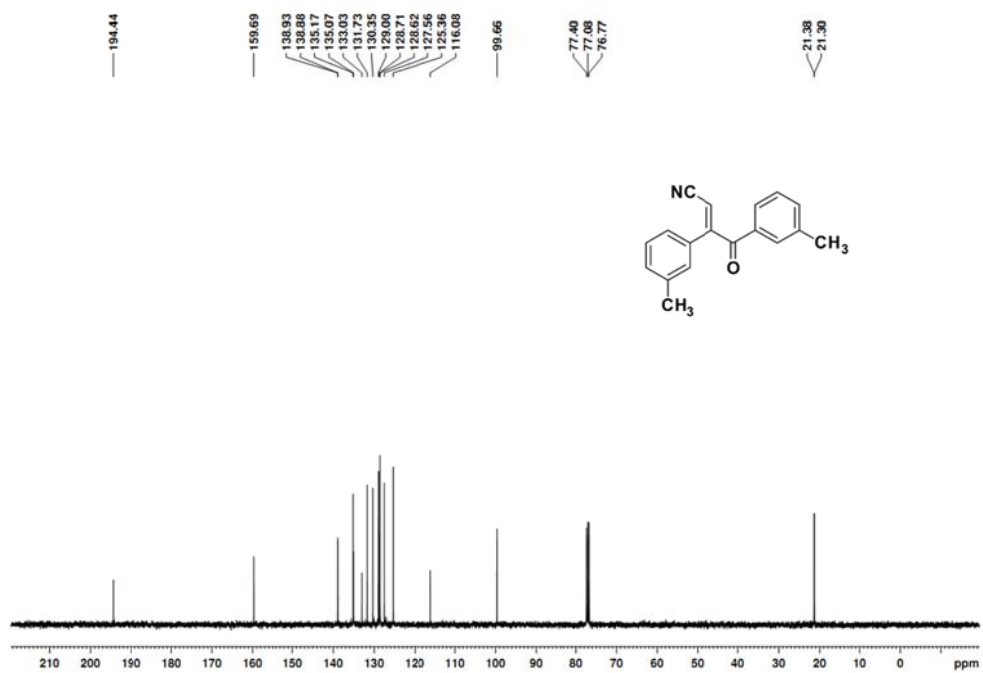

**(E)-4-oxo-3,4-di-*p*-tolylbut-2-enitrile (3d)**

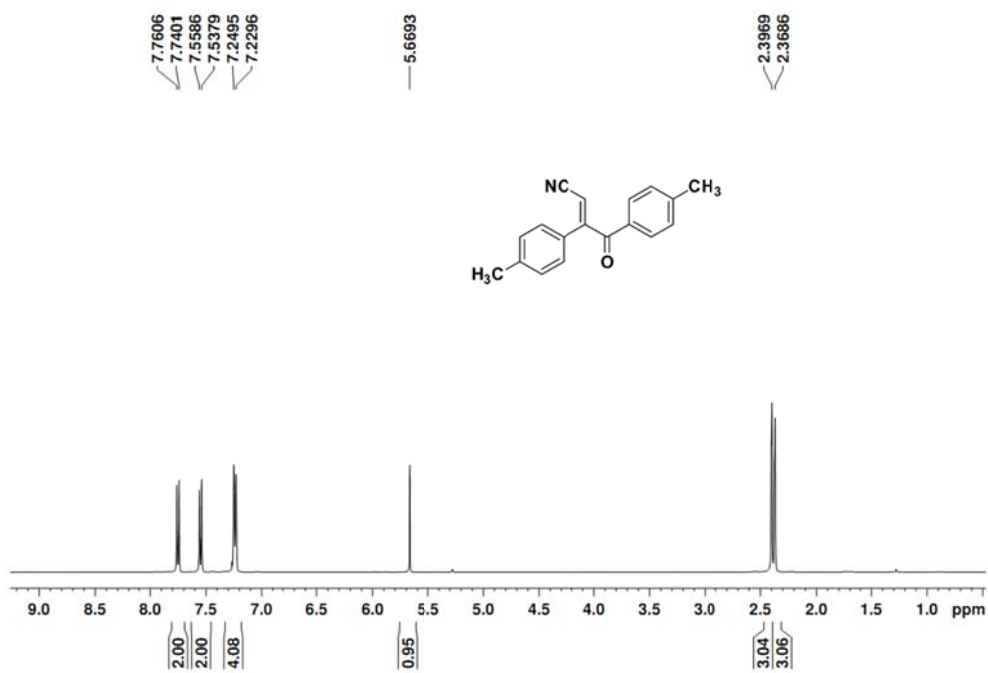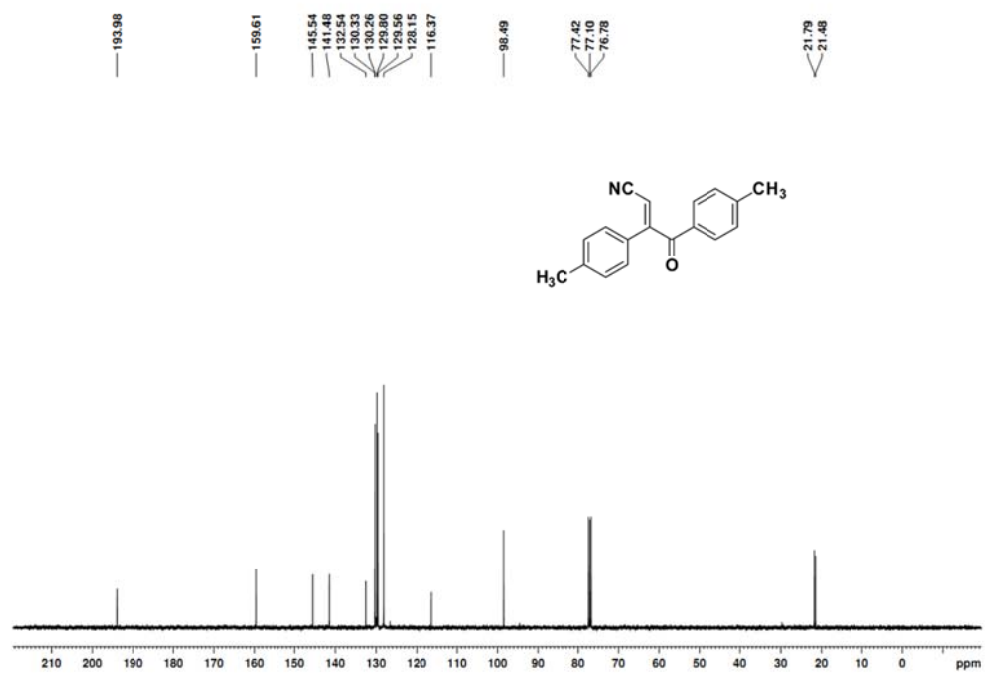

**(E)-3,4-bis(4-methoxyphenyl)-4-oxobut-2-enitrile (3e)**

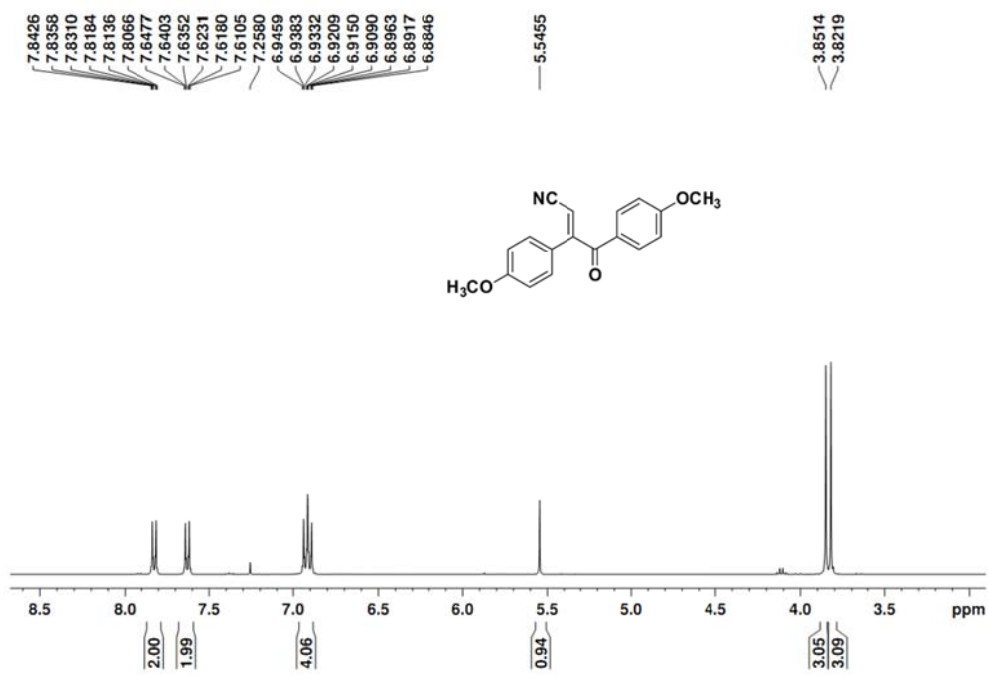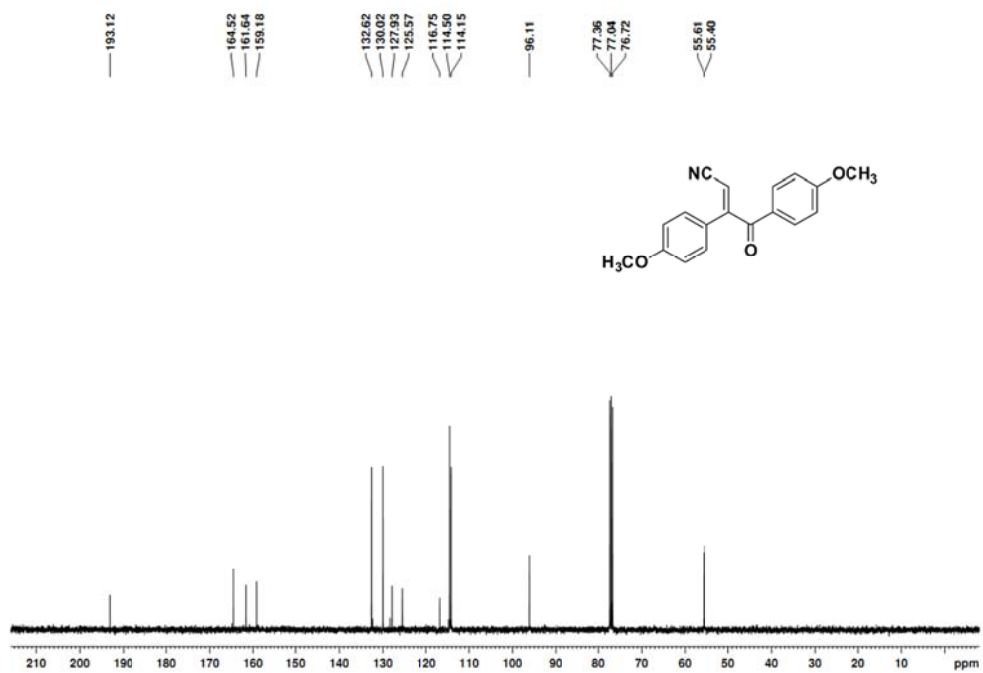



## methyl 3-cyano-2-phenylpropanoate

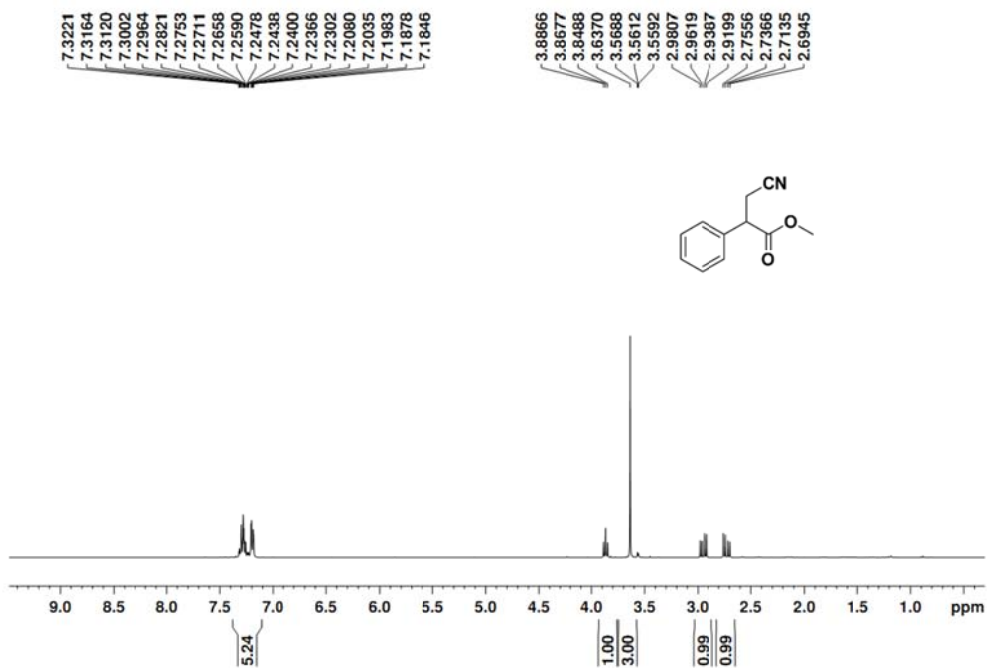

## ethyl 3-cyano-2-phenylpropanoate

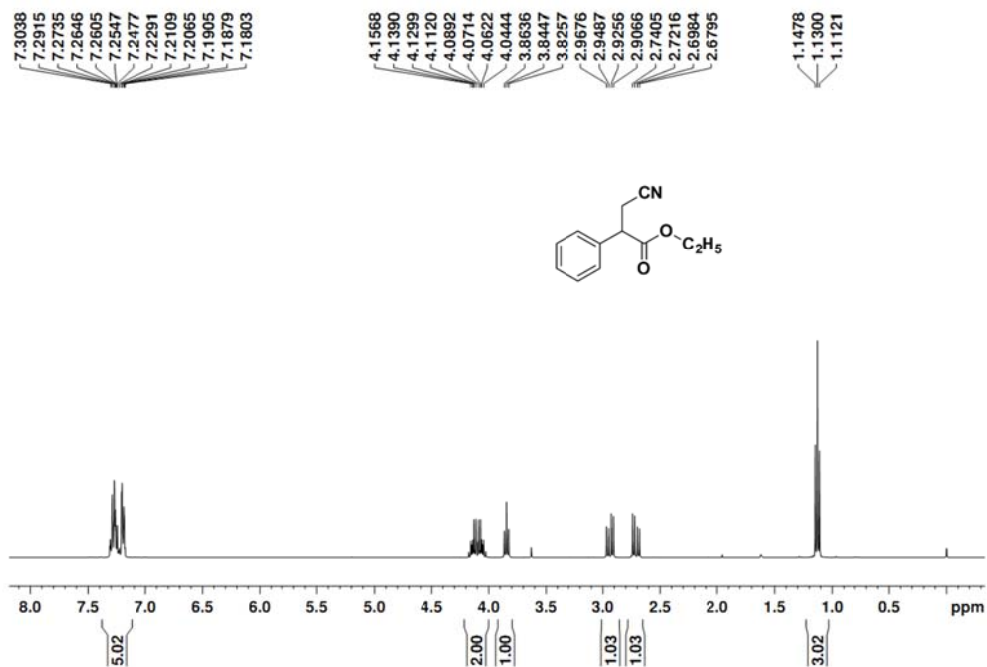

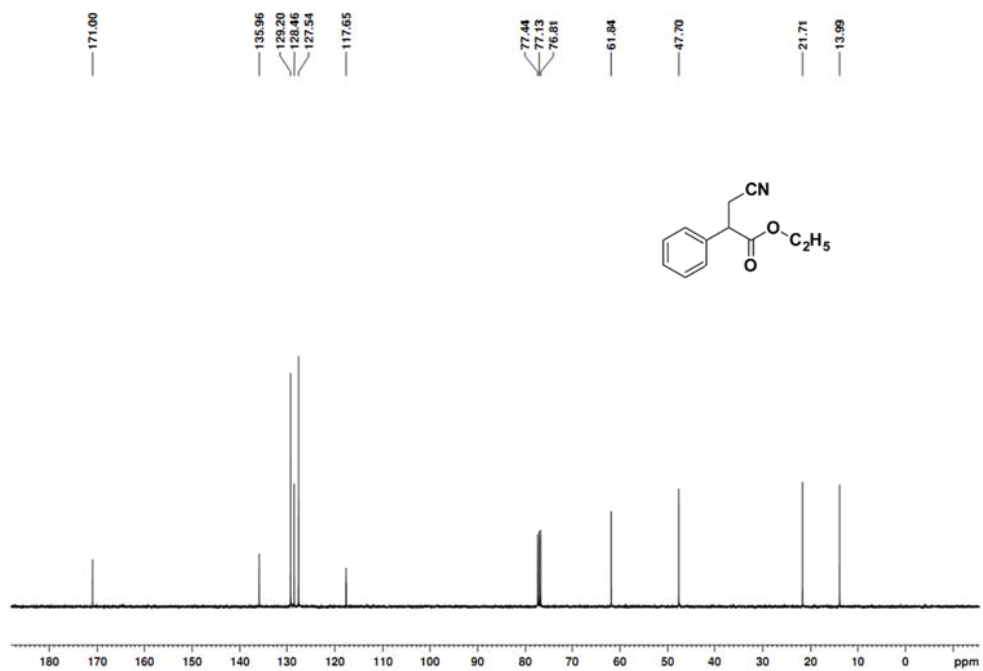

**methyl 3-cyano-2-(*p*-tolyl)propanoate**

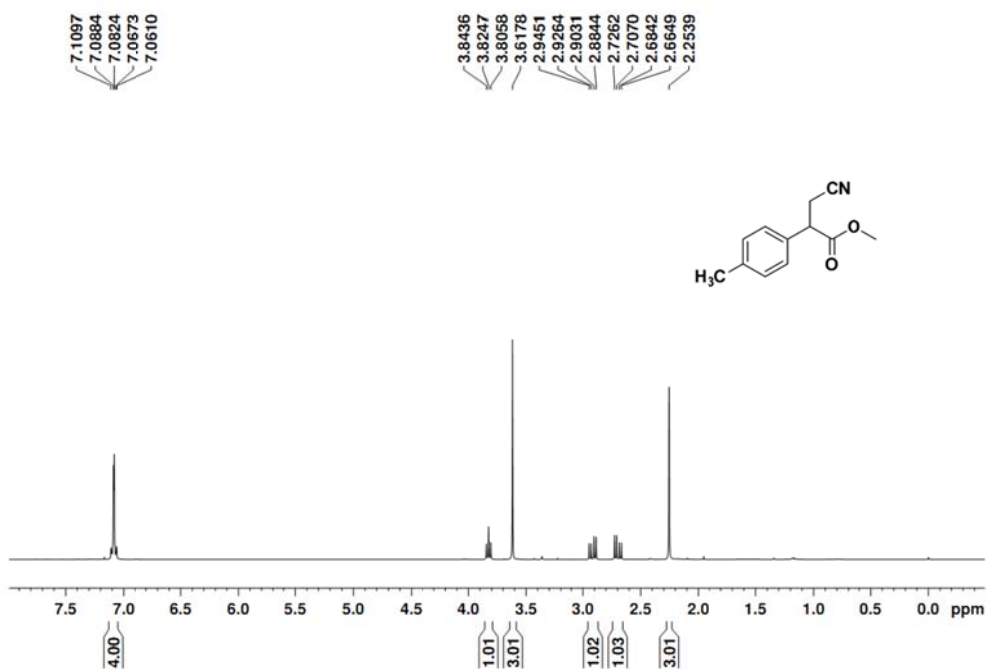

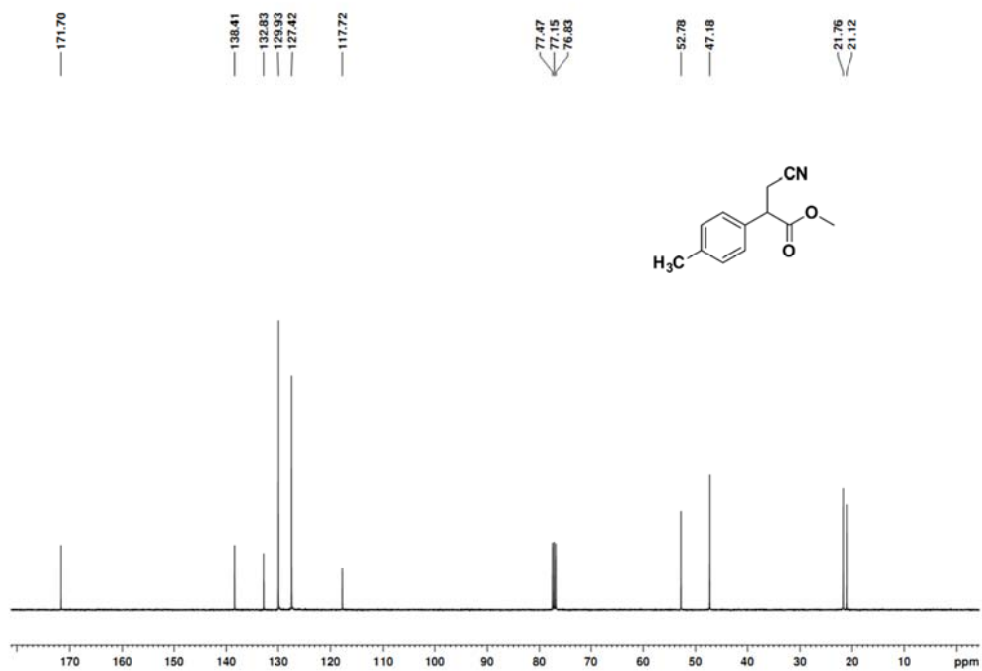

**methyl 3-cyano-2-(4-methoxyphenyl)propanoate**

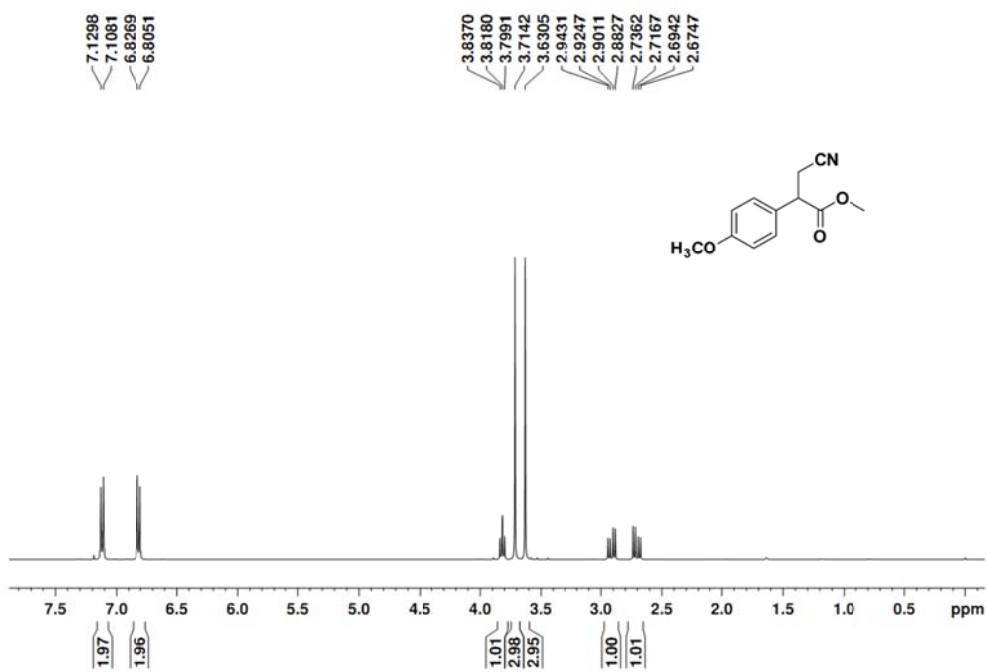

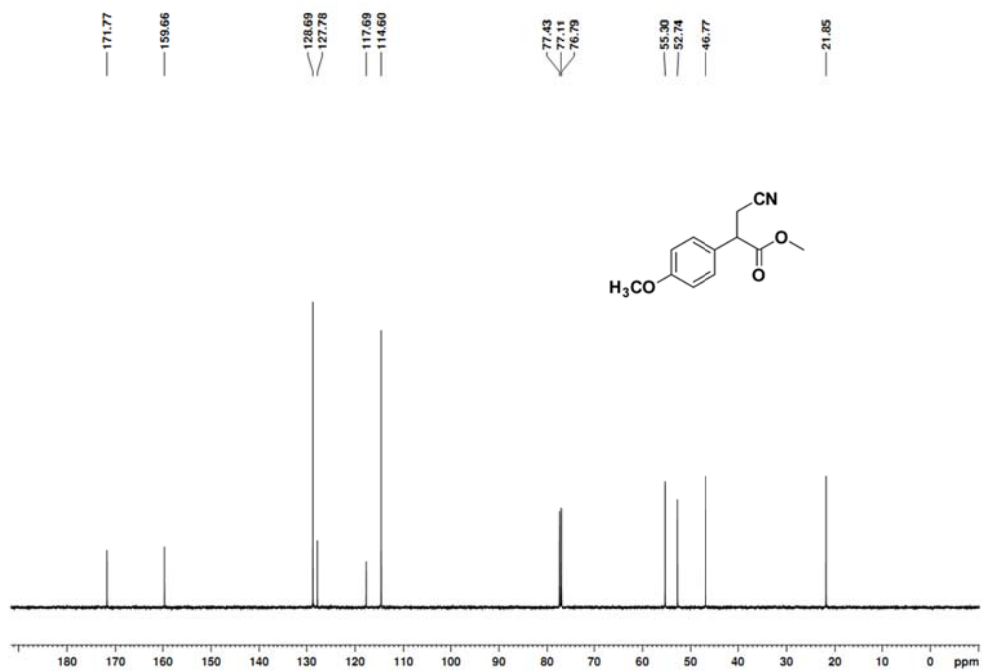

**methyl 3-cyano-2-(4-fluorophenyl)propanoate**

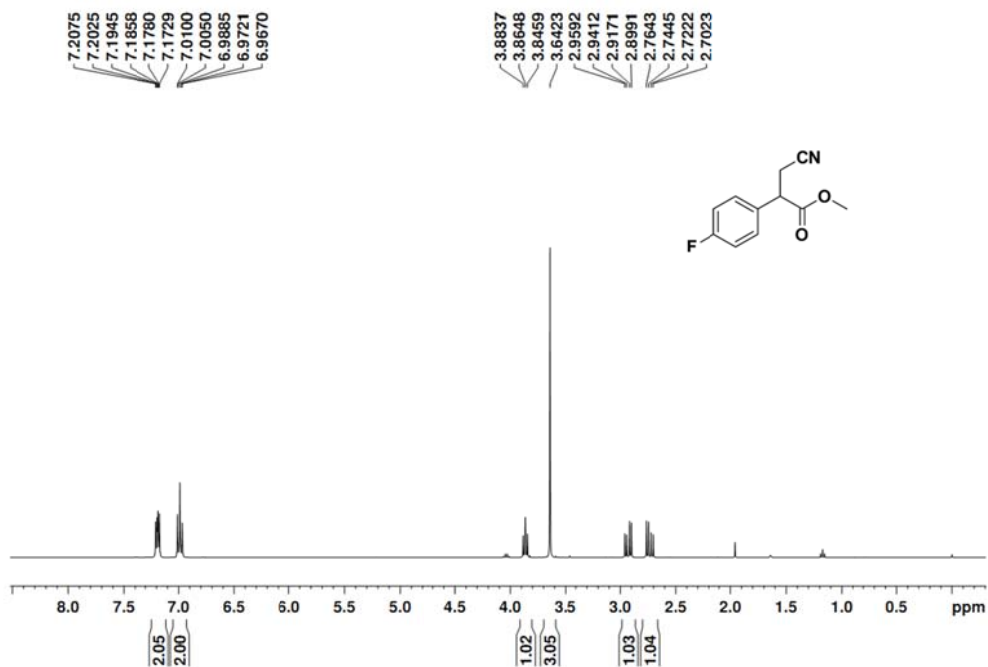

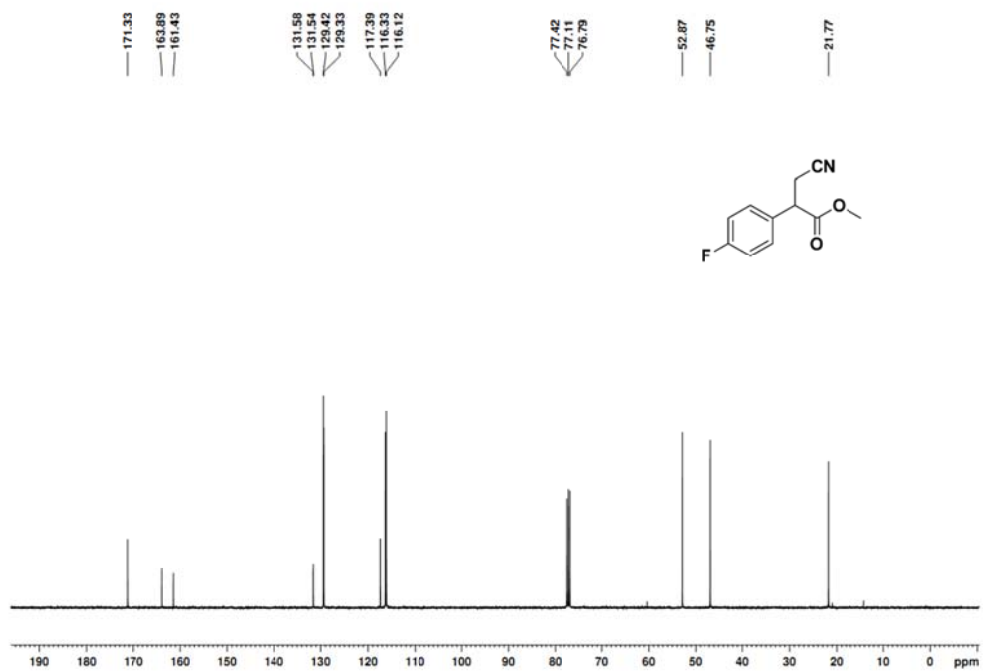

**methyl 2-(4-chlorophenyl)-3-cyanopropanoate**

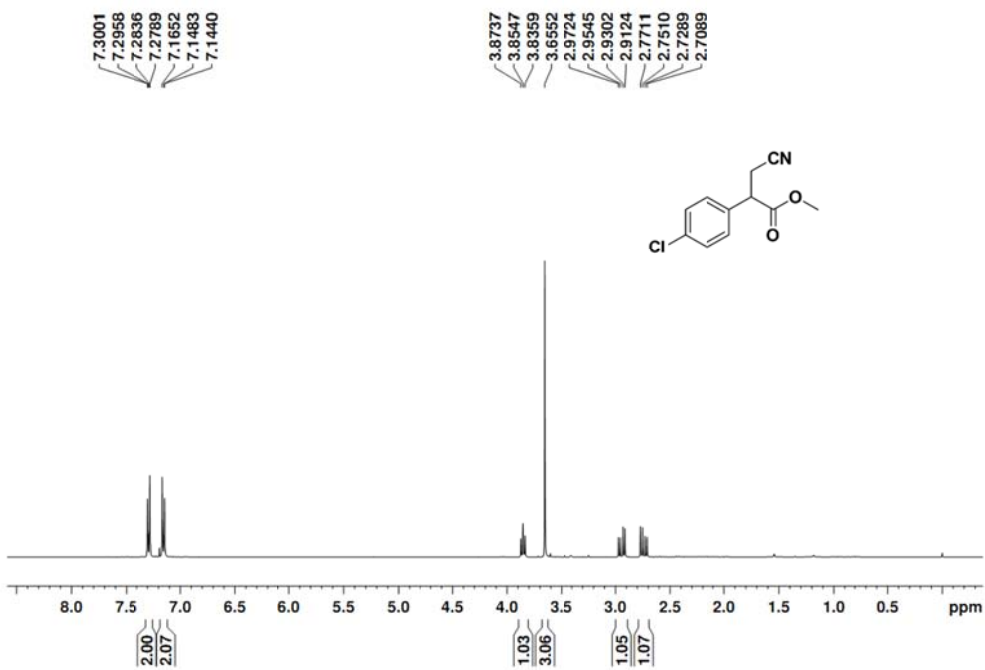

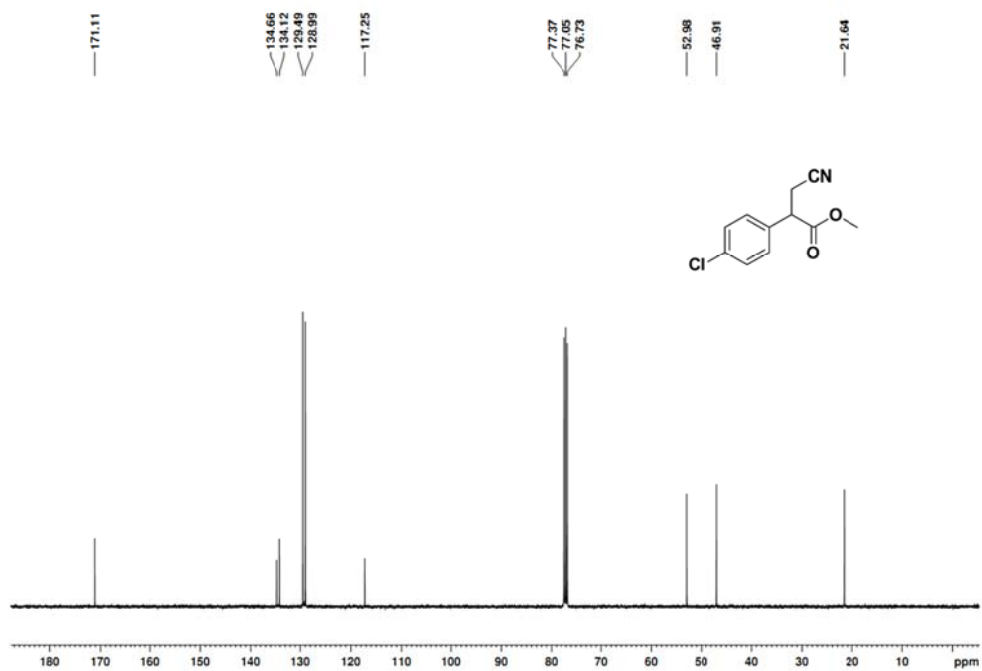

**methyl 2-(4-bromophenyl)-3-cyanopropanoate**

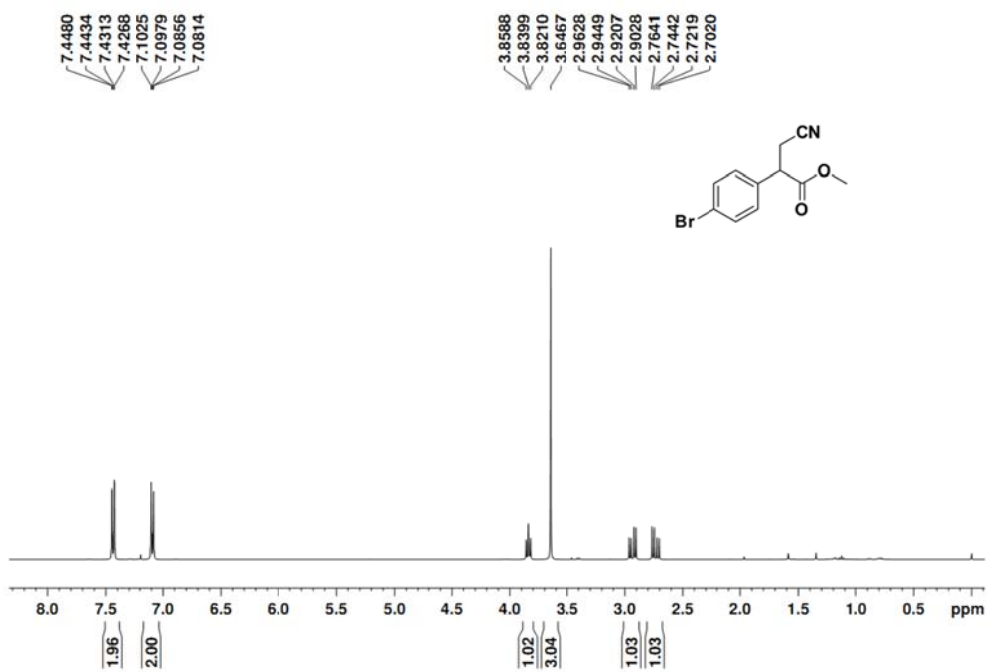

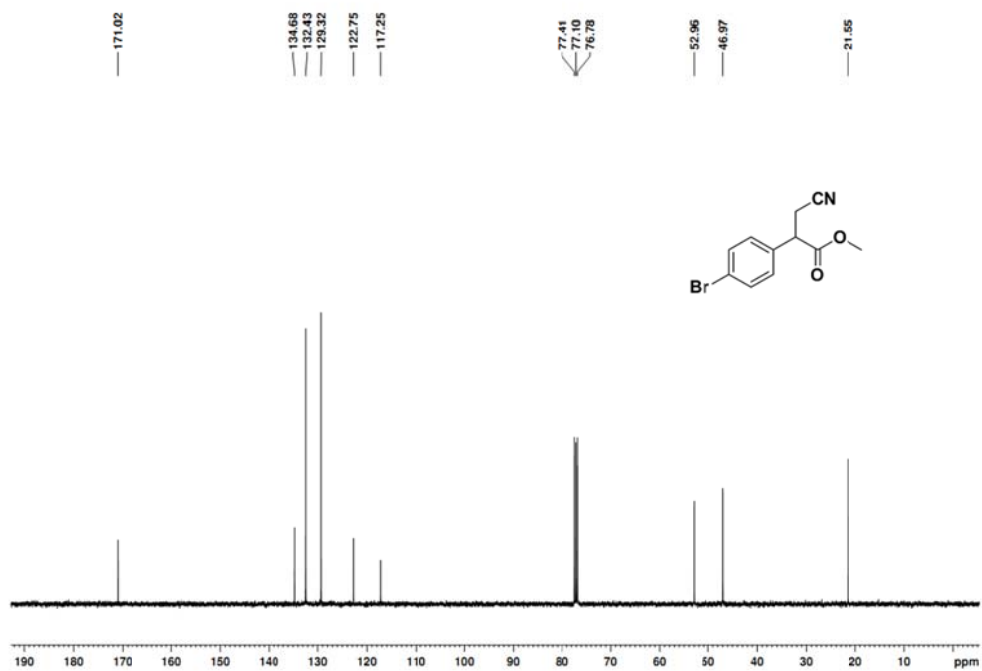

methyl 3-cyano-2-(*m*-tolyl)propanoate

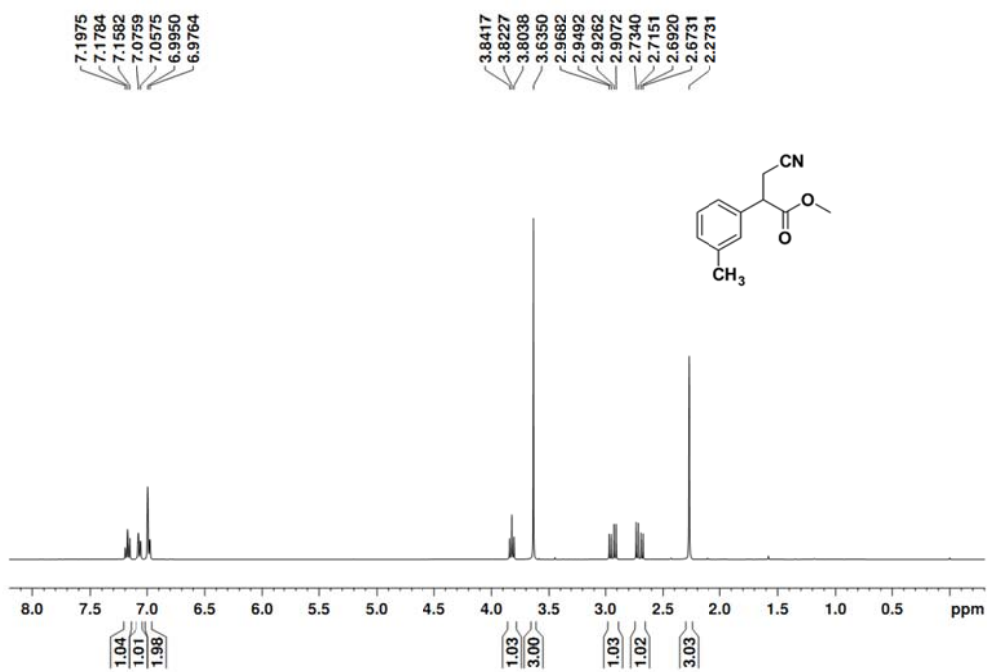

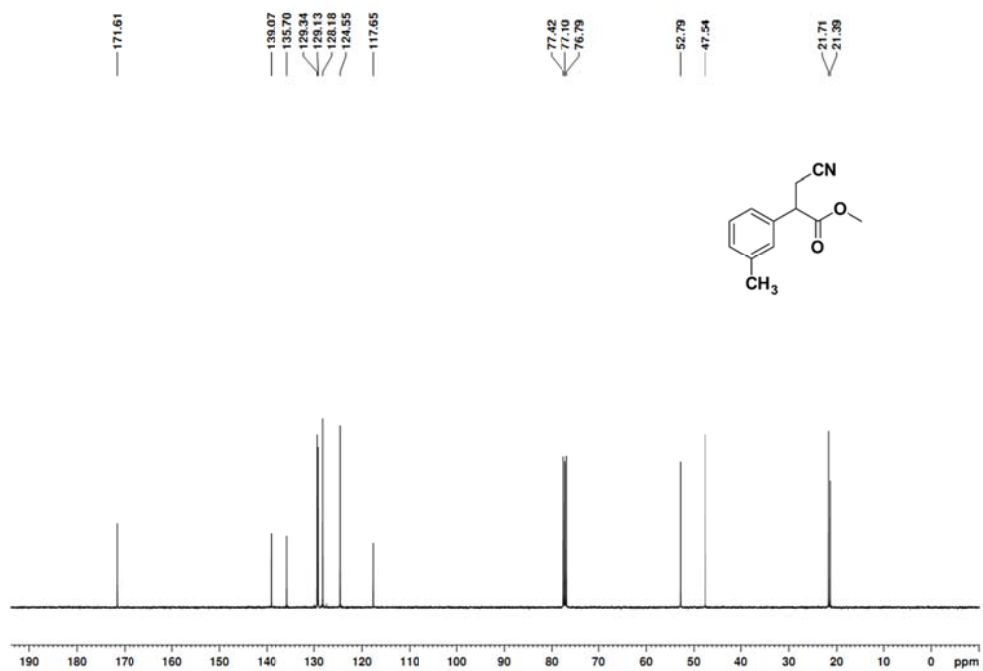

**methyl 3-cyano-2-(3-methoxyphenyl)propanoate**

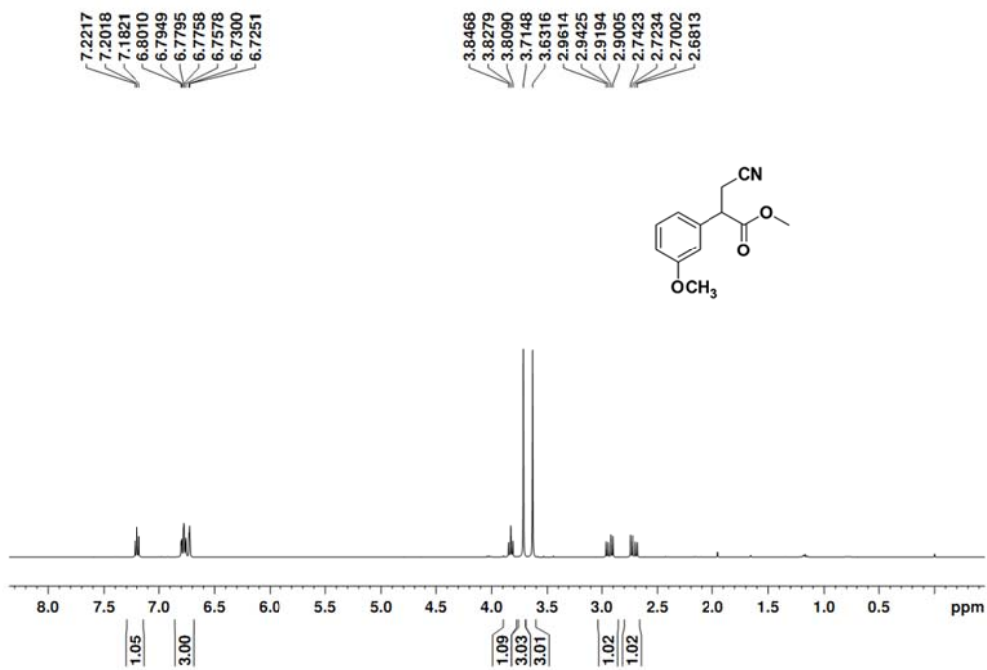



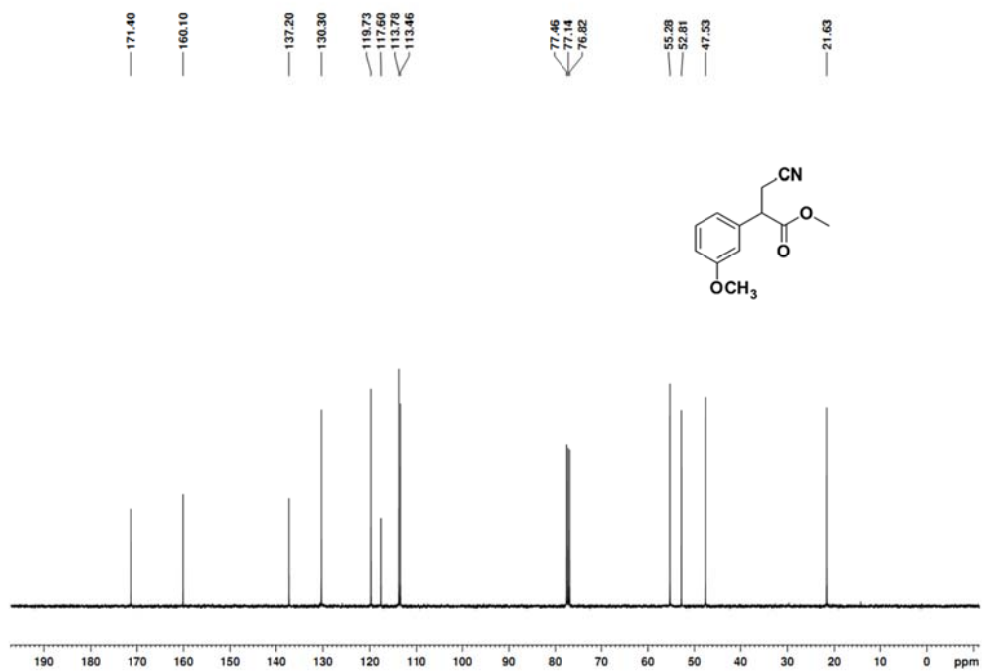

**methyl 3-cyano-2-(3-fluorophenyl)propanoate**

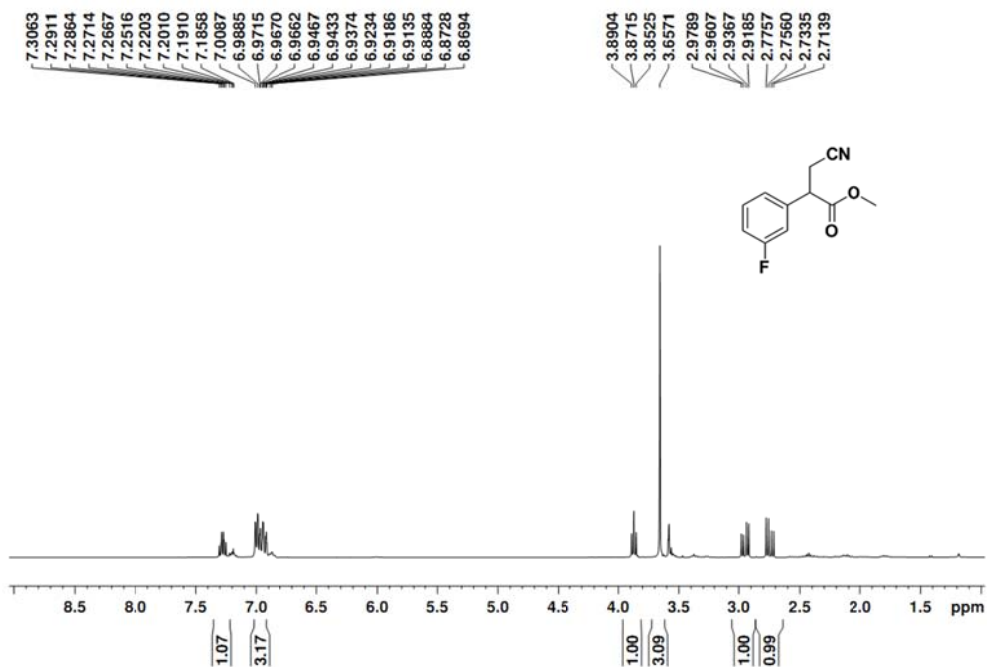

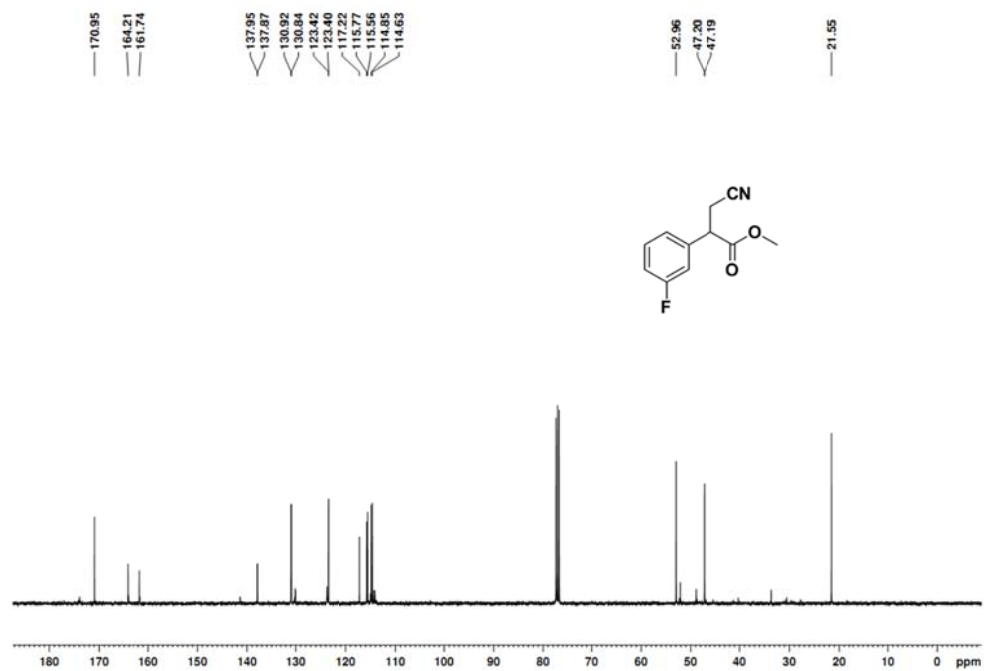

**methyl 3-cyano-2-(*o*-tolyl)propanoate**

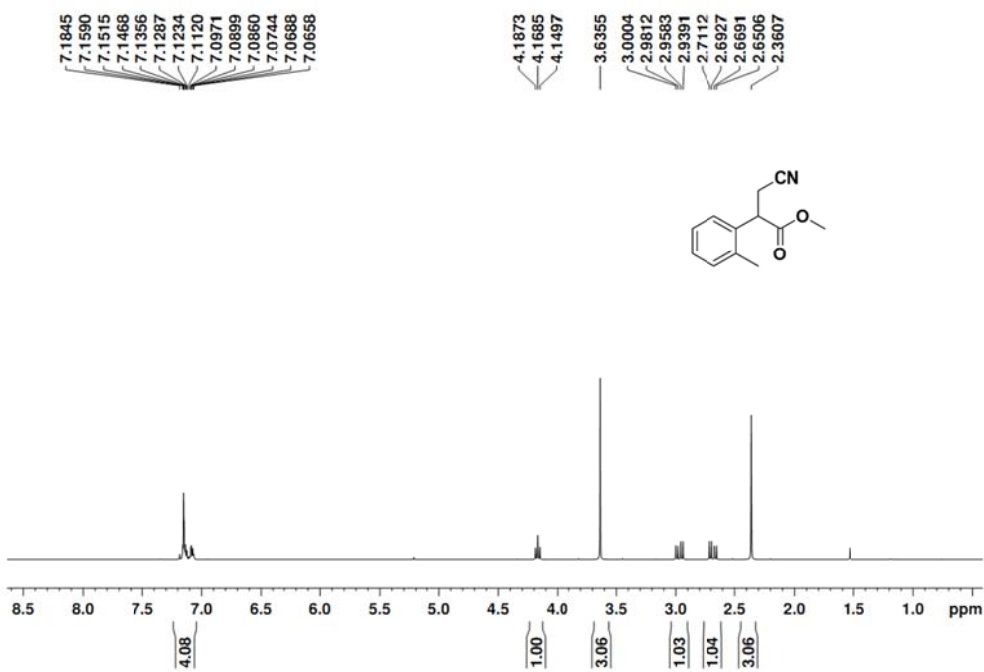

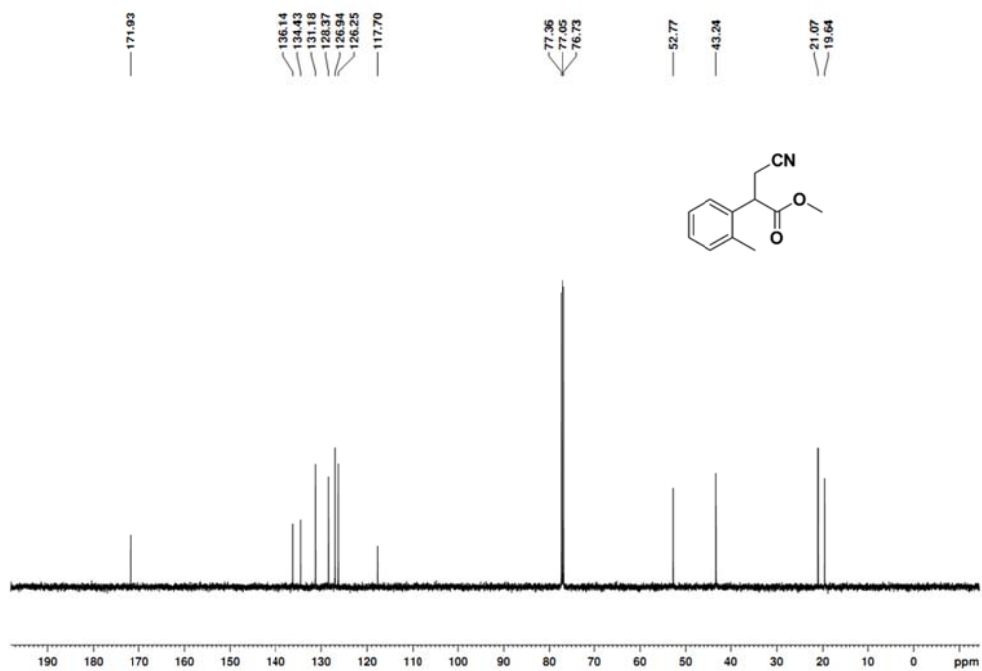

**methyl 3-cyano-2-(2-methoxyphenyl)propanoate**

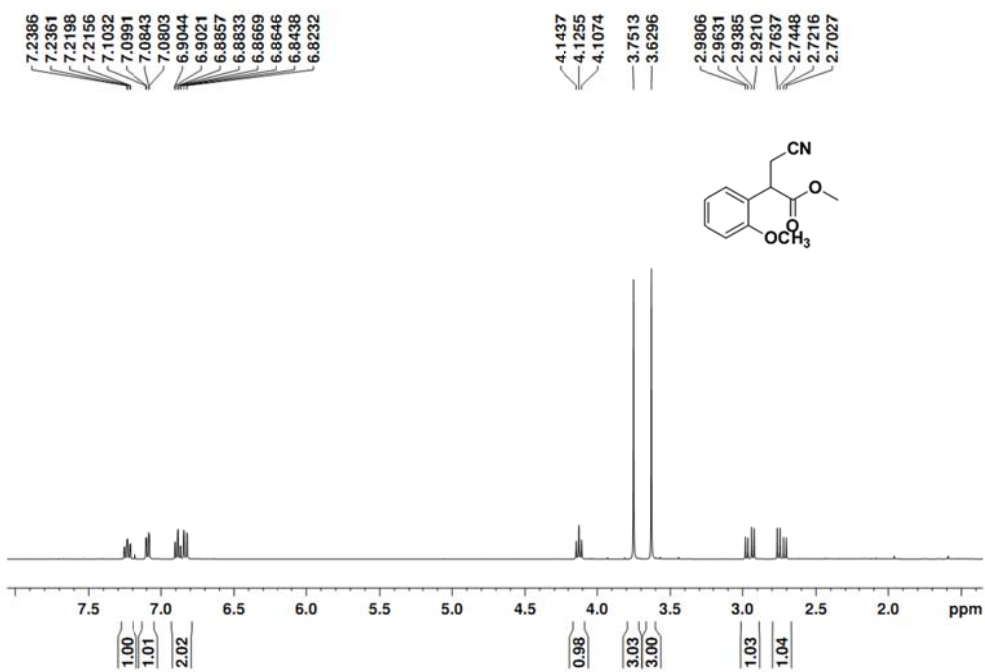

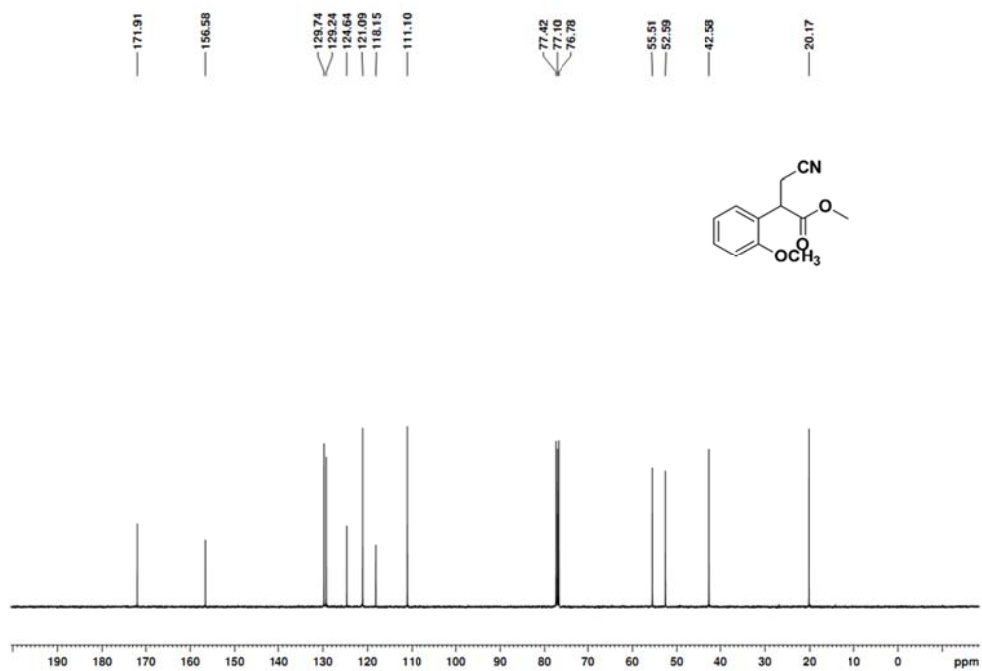

**methyl 3-cyano-2-(naphthalen-1-yl)propanoate**

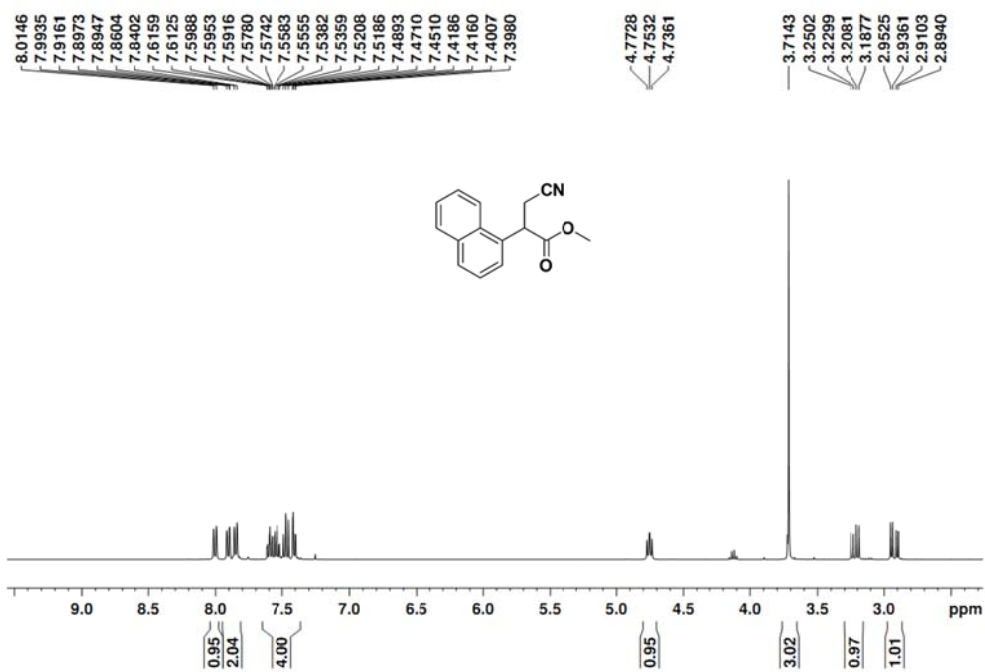

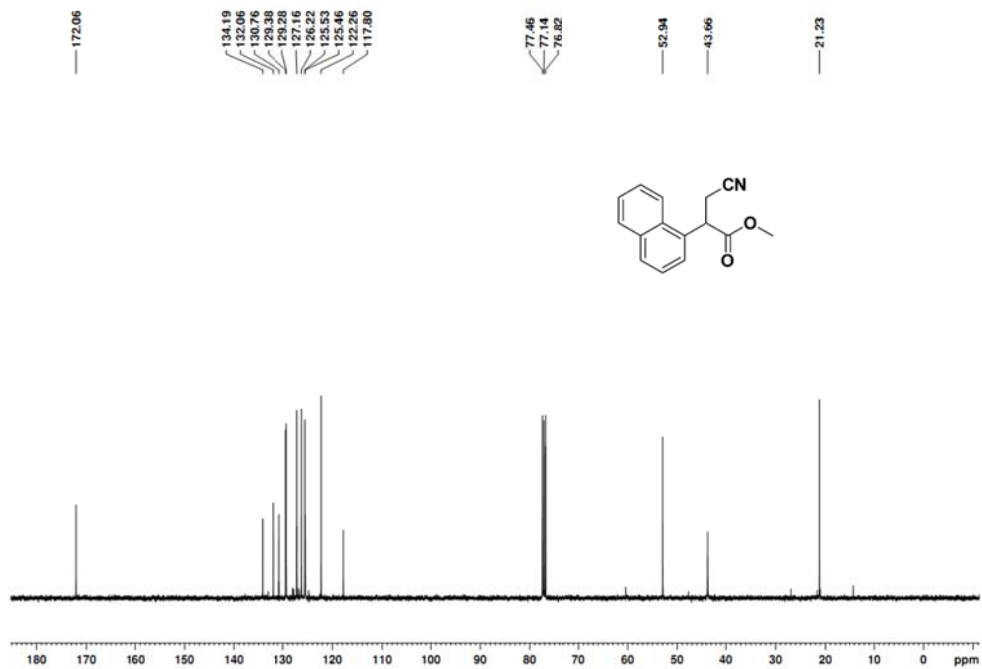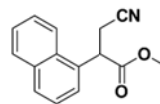

**methyl 3-cyano-2-(naphthalen-2-yl)propanoate**

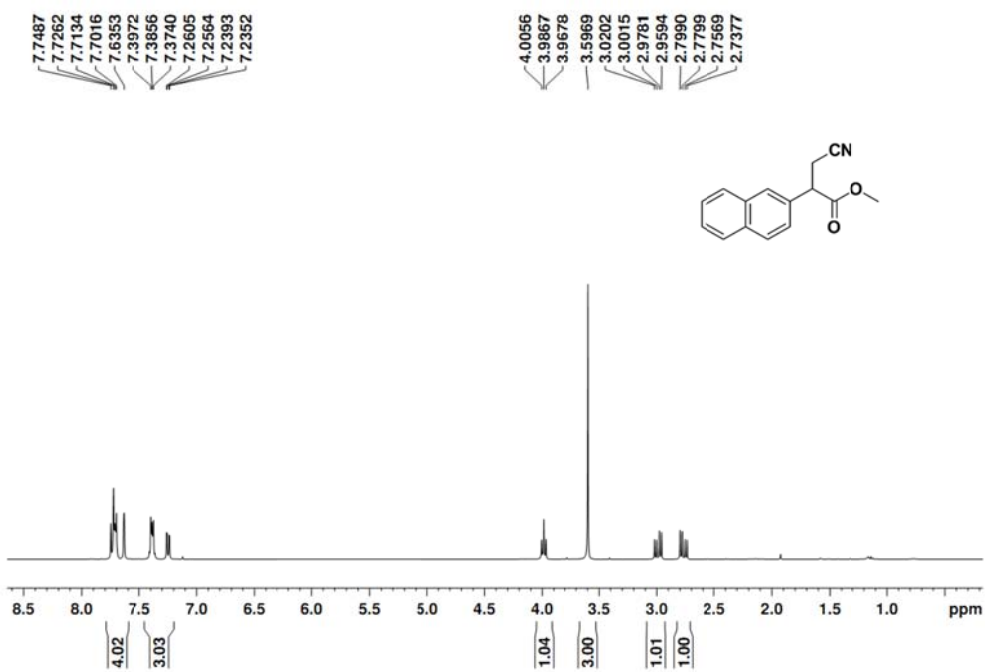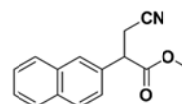

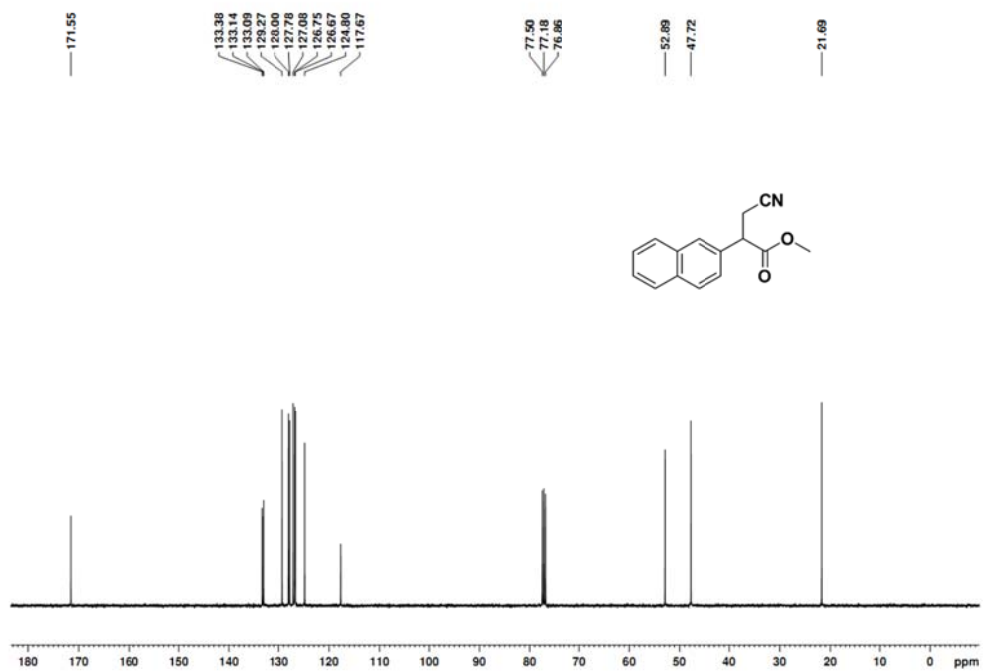

**methyl 2-(cyanomethyl)-3-methylbutanoate**

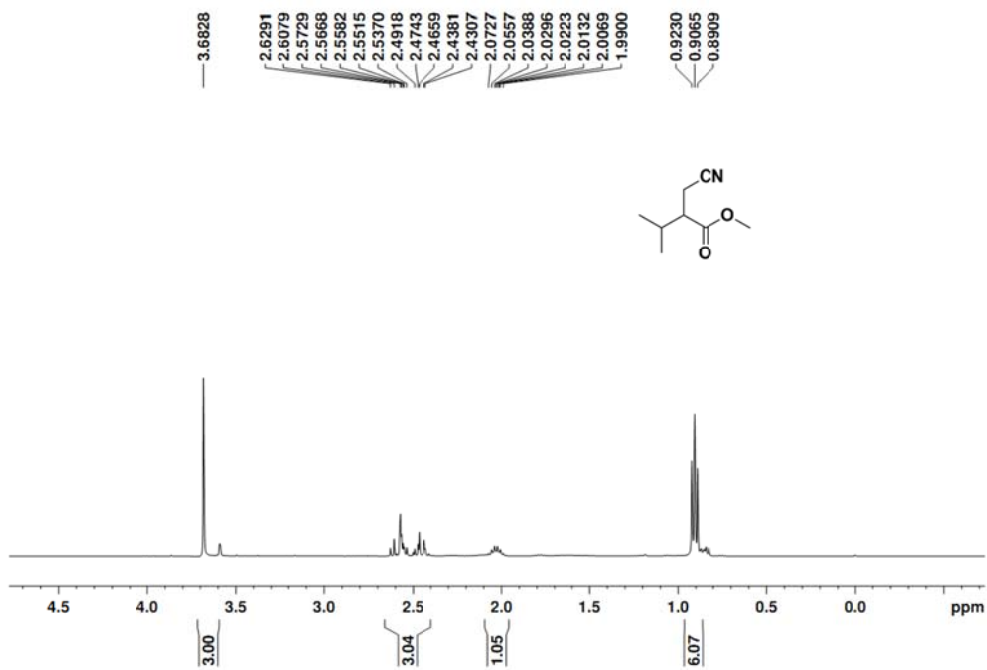

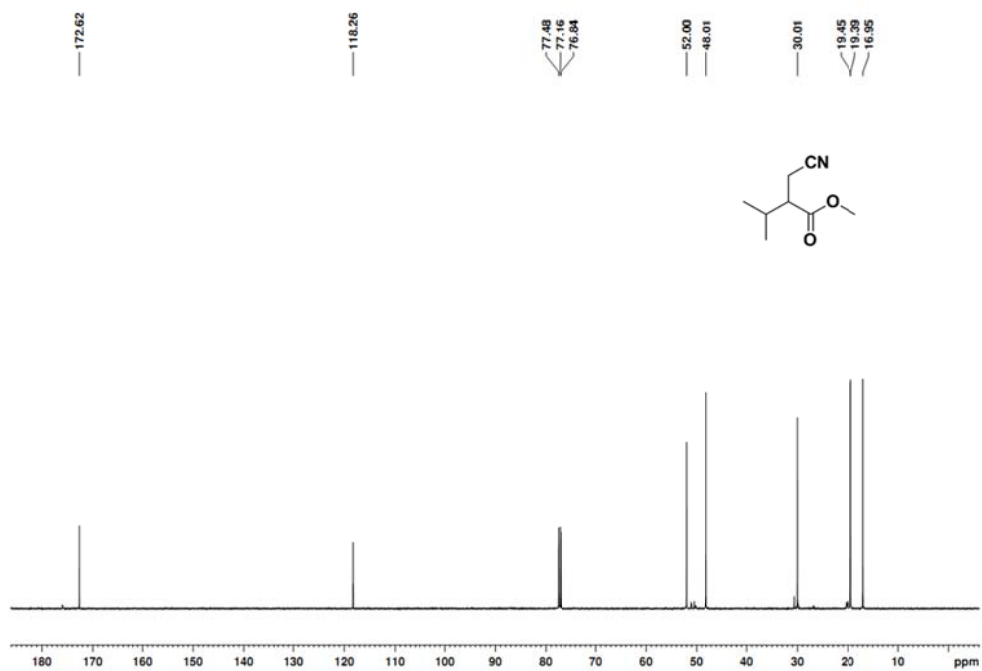

**methyl 3-cyano-2-cyclohexylpropanoate**

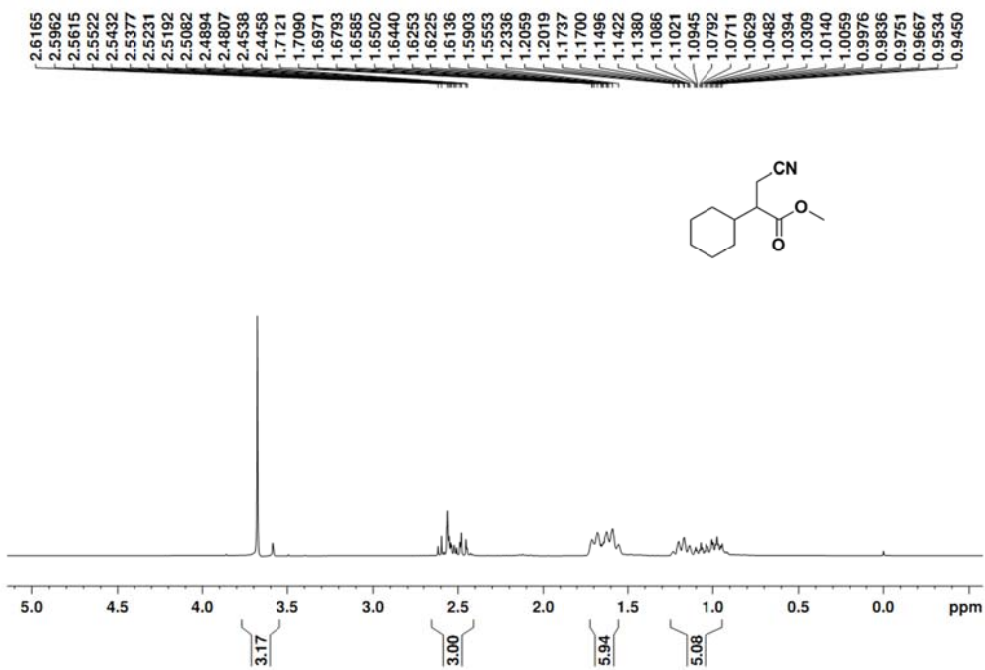

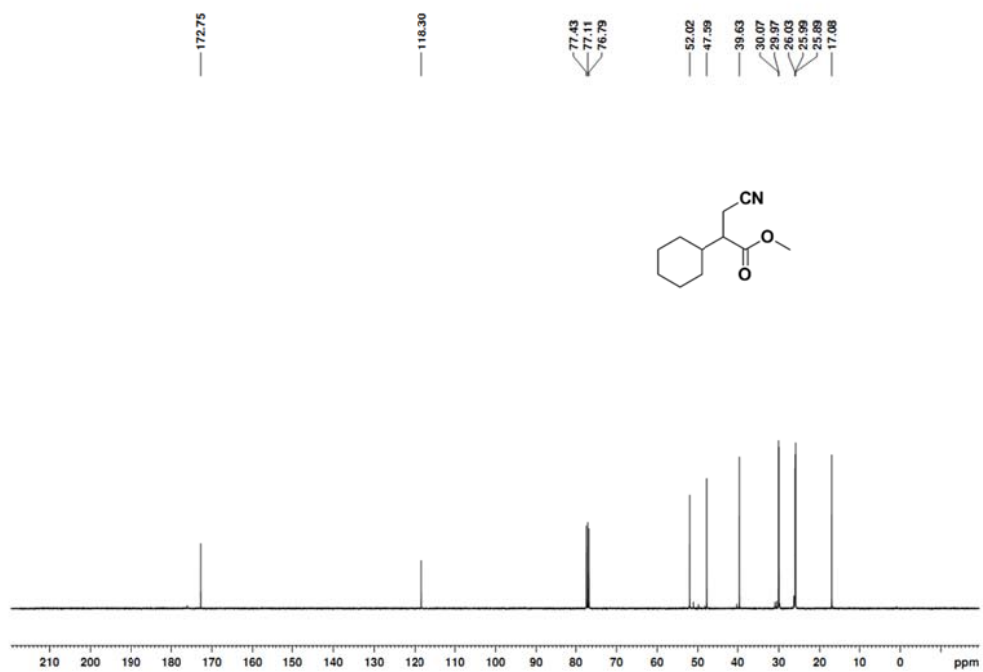

#### 4-oxo-3,4-diphenylbutanenitrile (4a)

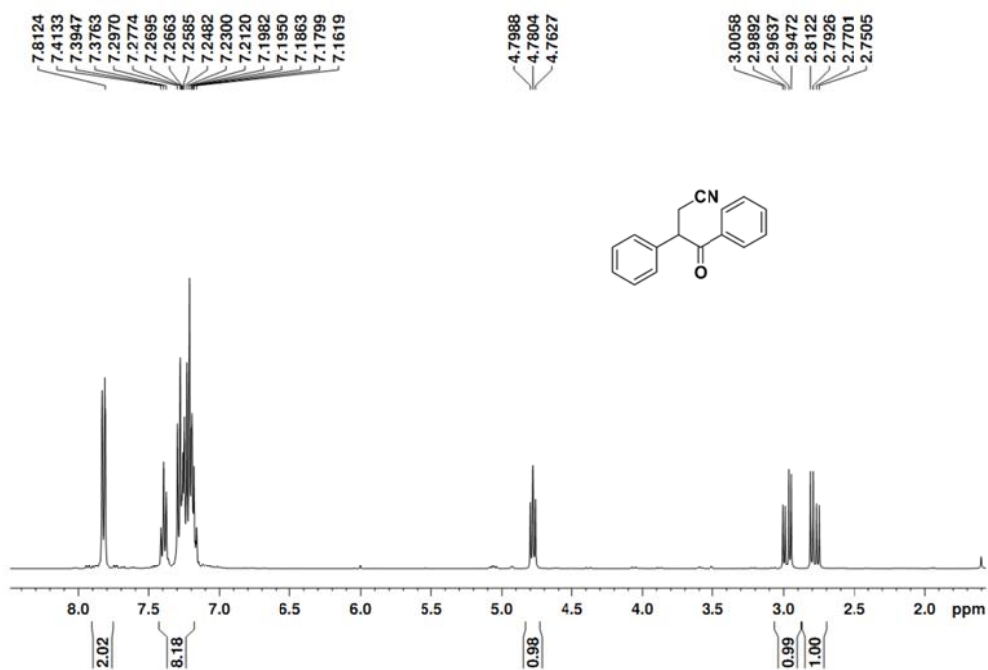



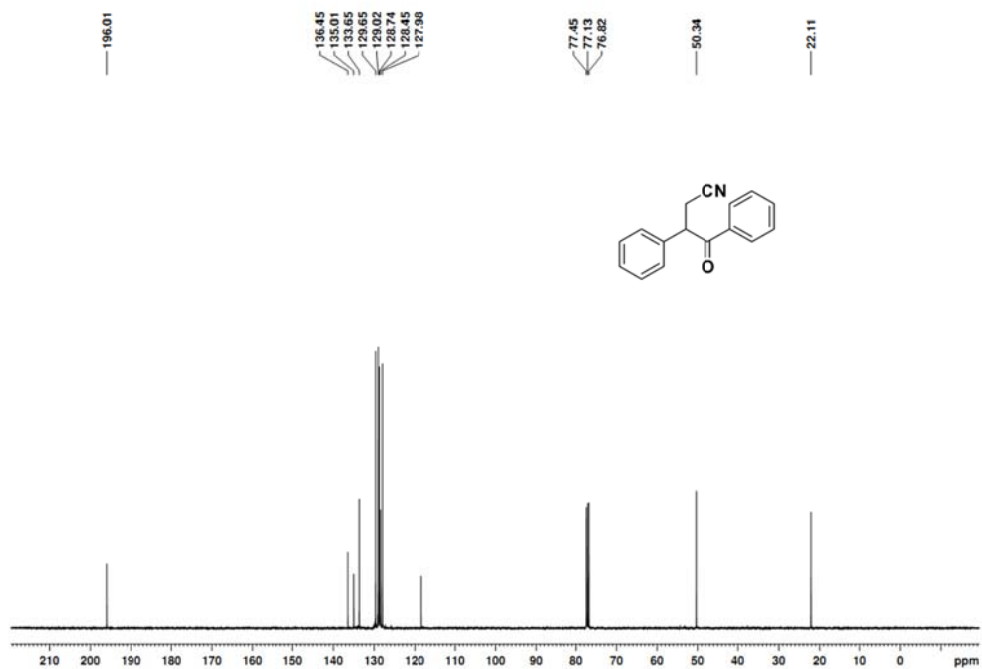

### 3,4-bis(2-methoxyphenyl)-4-oxobutanenitrile (4b)

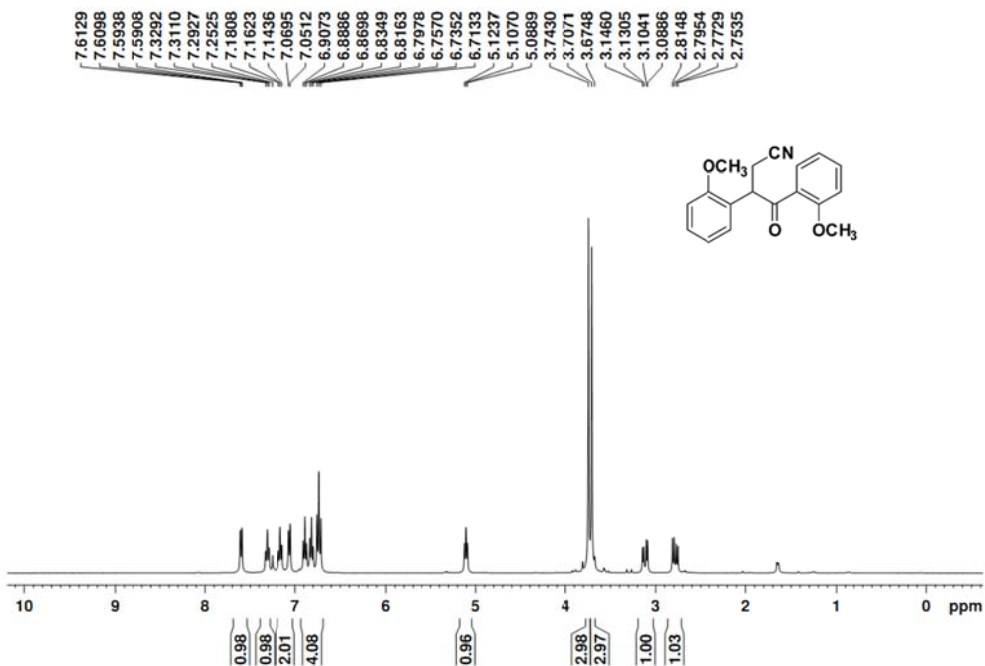

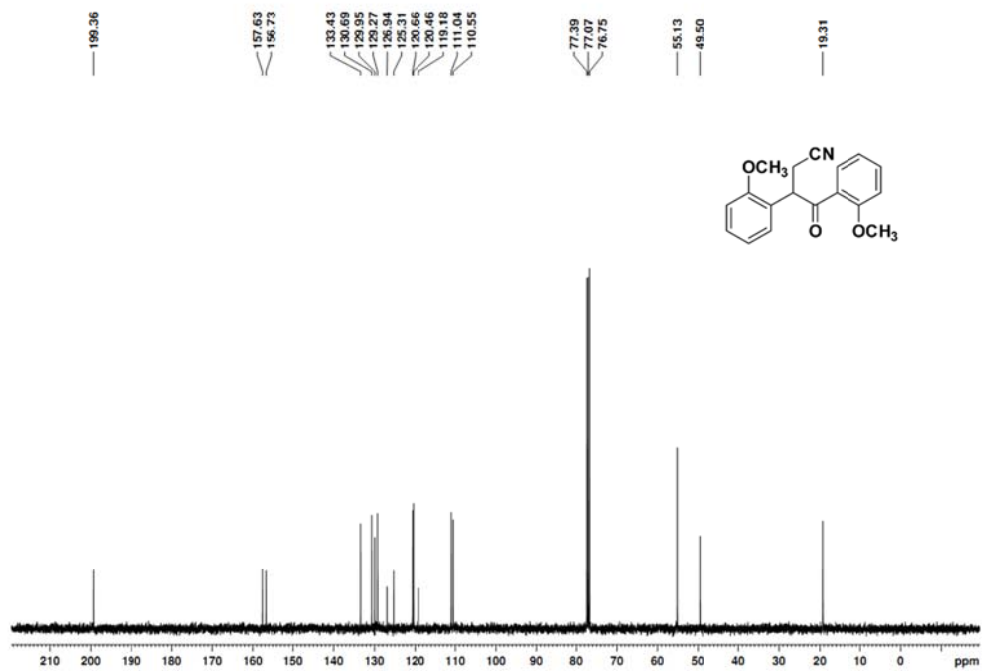

### 4-oxo-3,4-di-*m*-tolylbutanenitrile (4c)

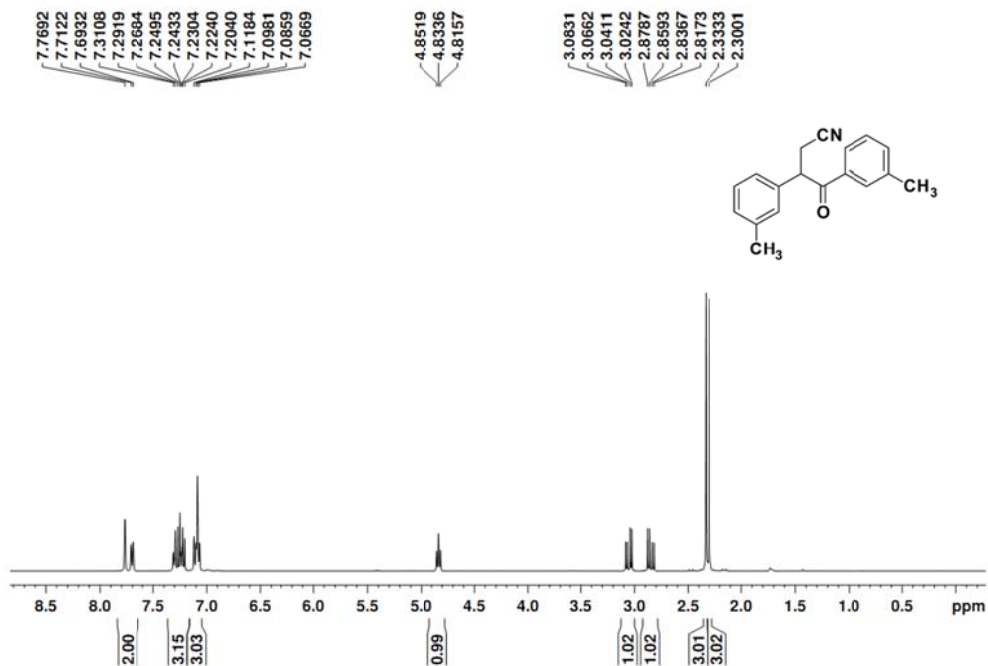

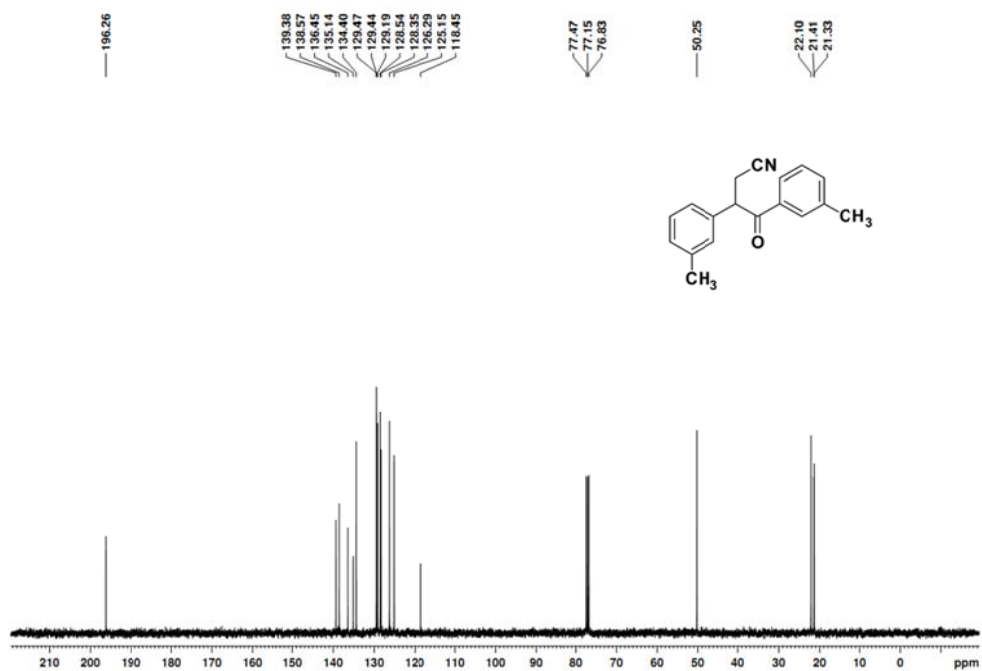

#### 4-oxo-3,4-di-*p*-tolylbutanenitrile (4d)

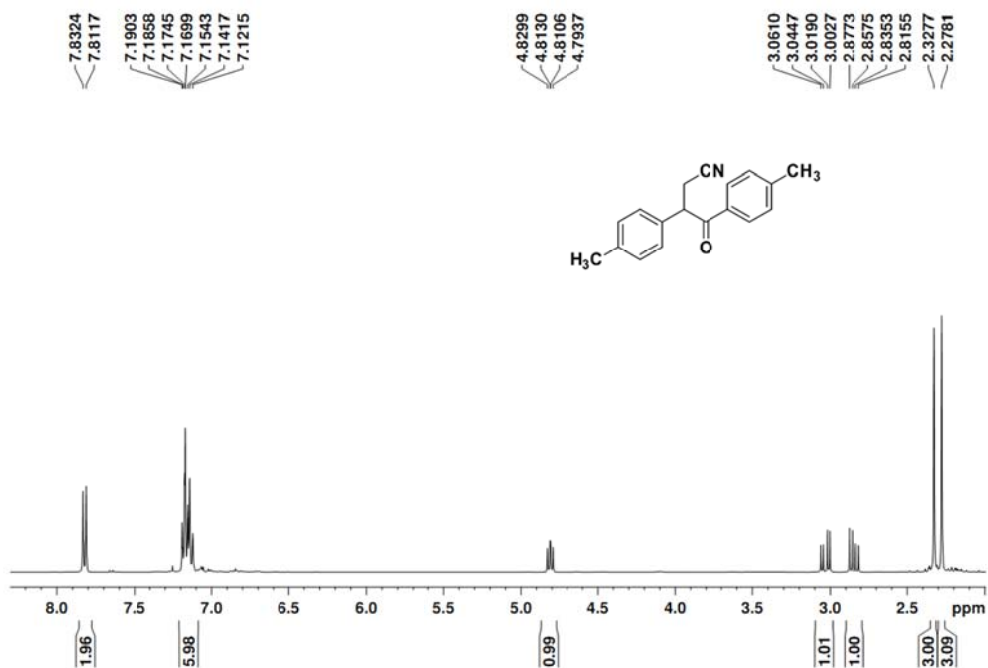

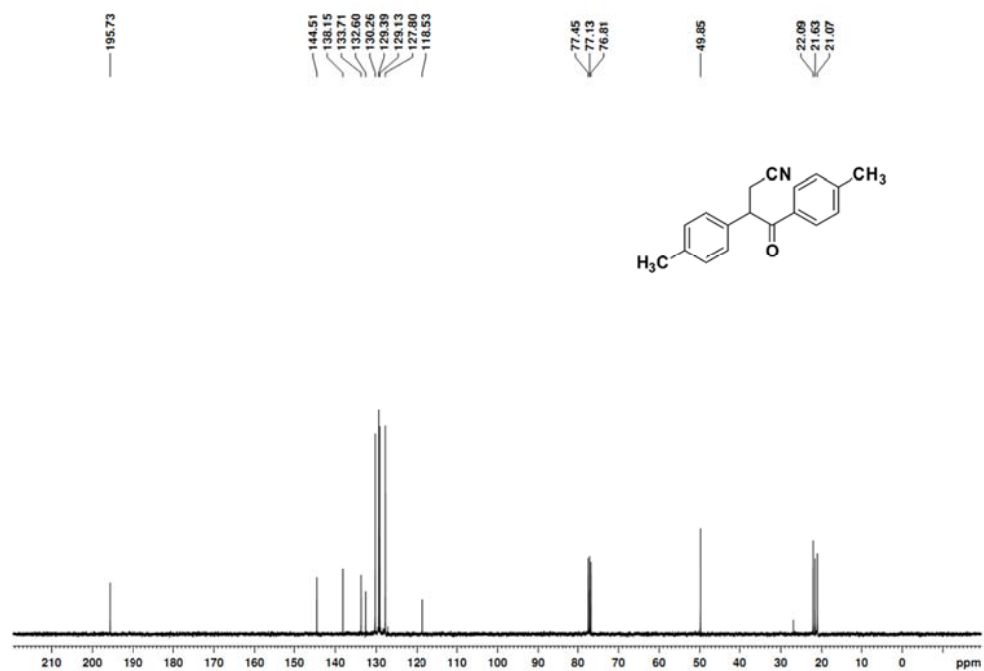

### 3,4-bis(4-methoxyphenyl)-4-oxobutanenitrile (4e)

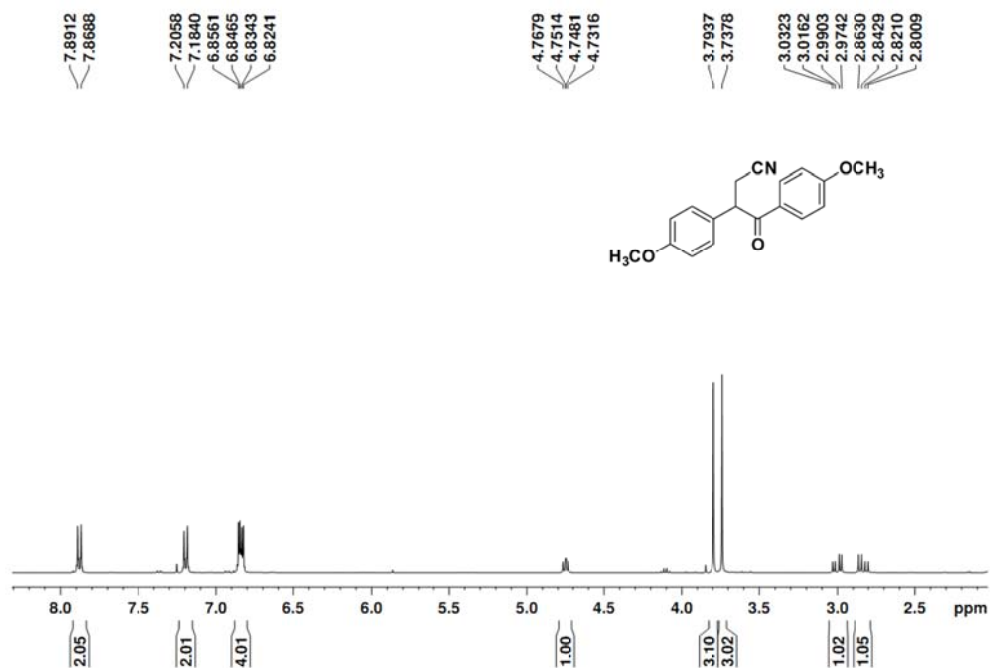

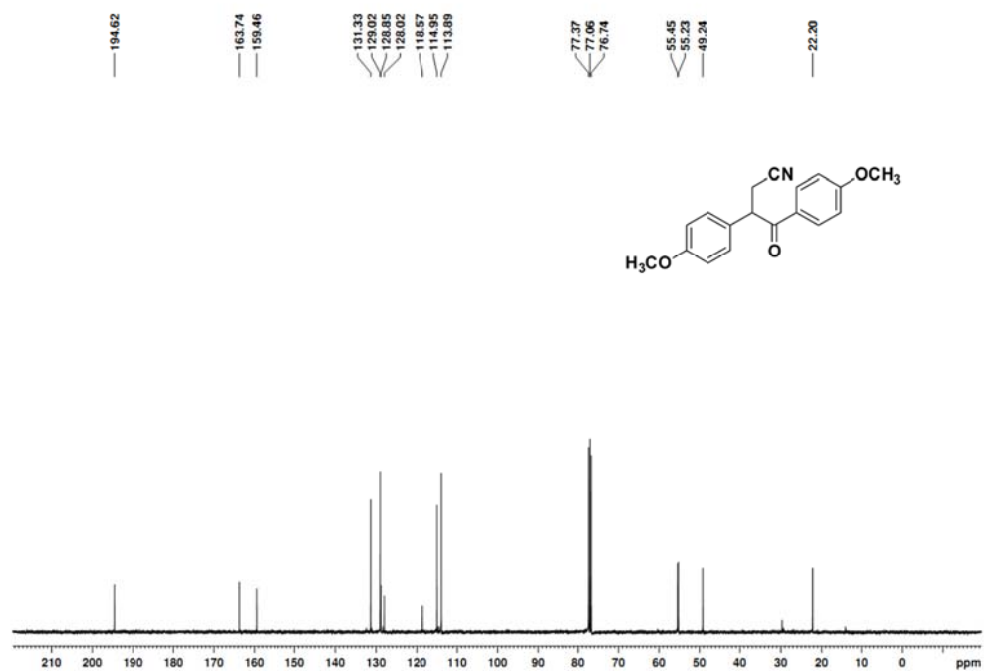

#### 4-hydroxy-3,4-diphenylbutanenitrile (5a)

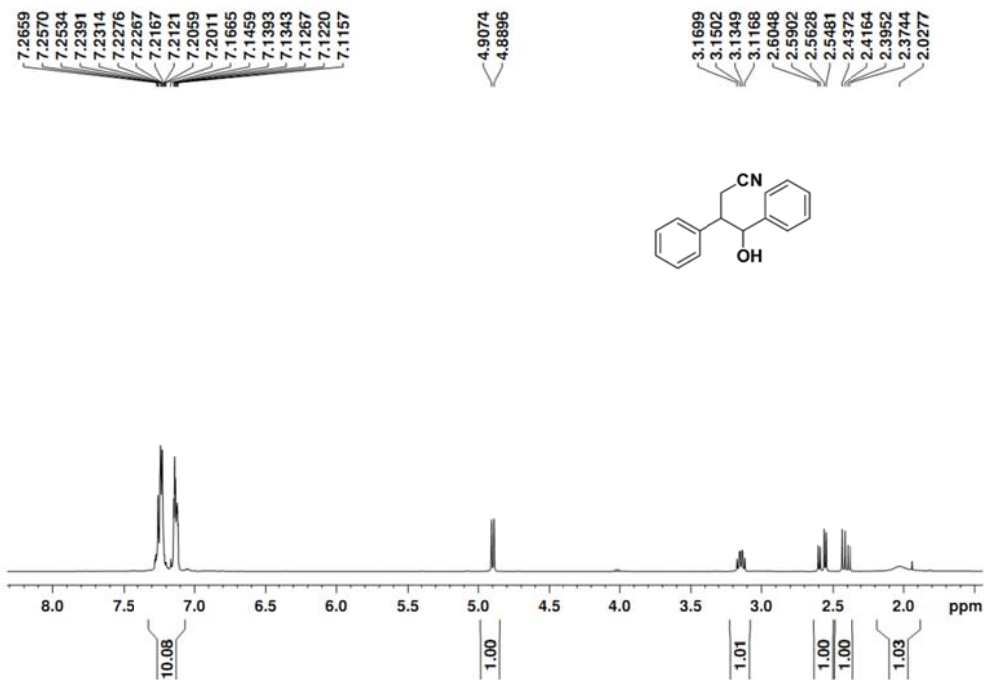

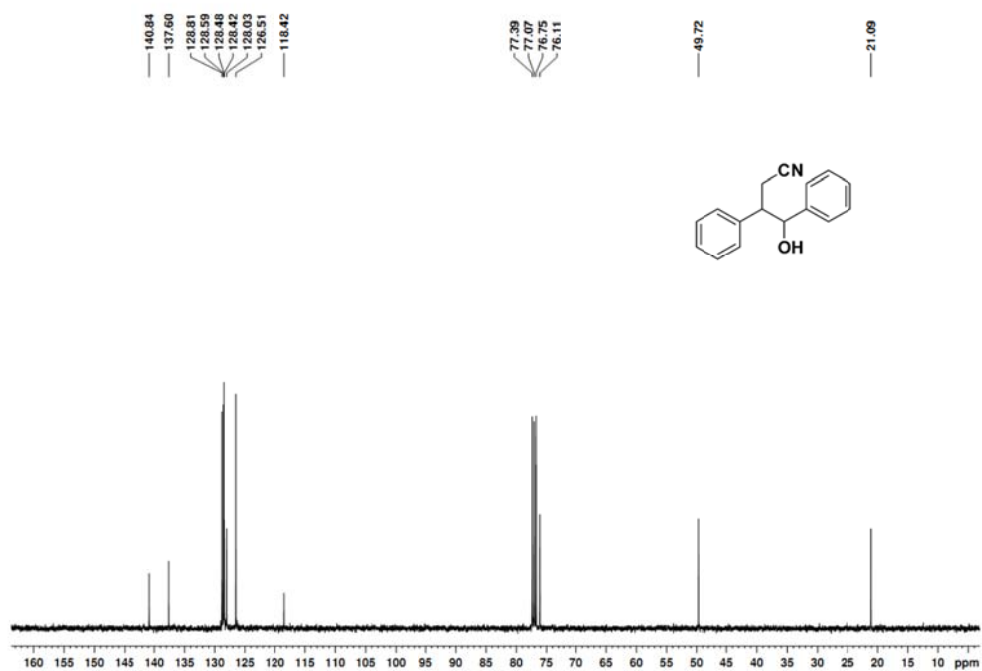

#### 4-hydroxy-3,4-bis(2-methoxyphenyl)butanenitrile (5b)

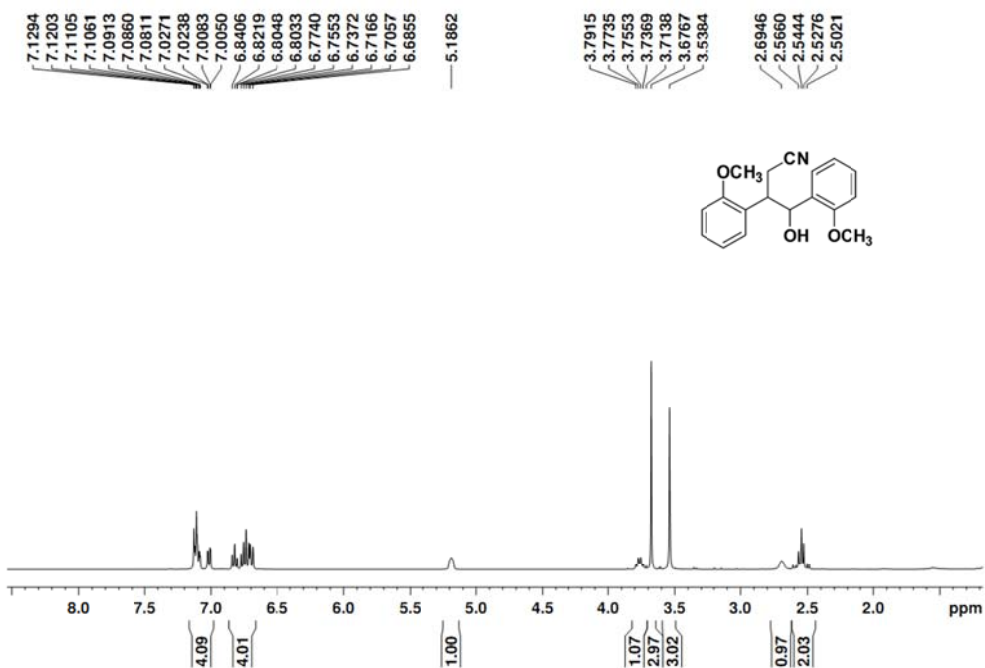

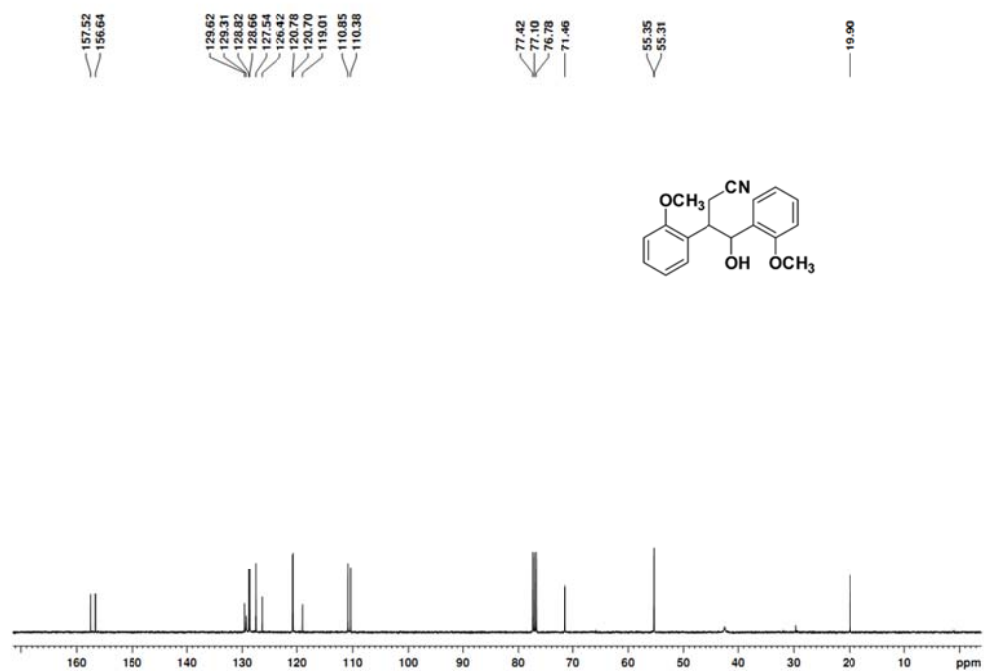

#### 4-hydroxy-3,4-di-*m*-tolylbutanenitrile (5c)

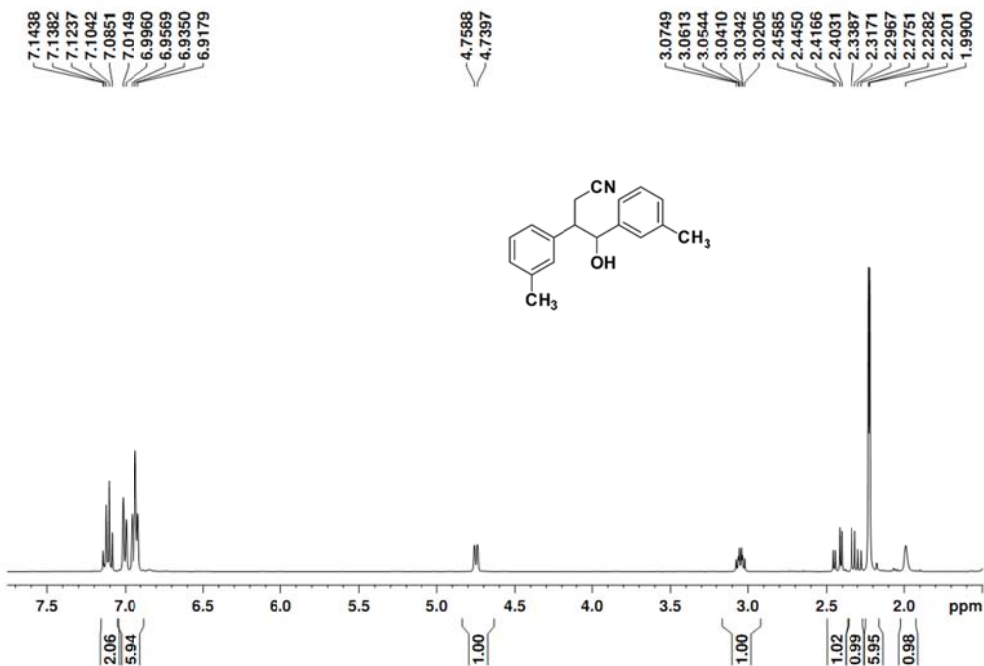

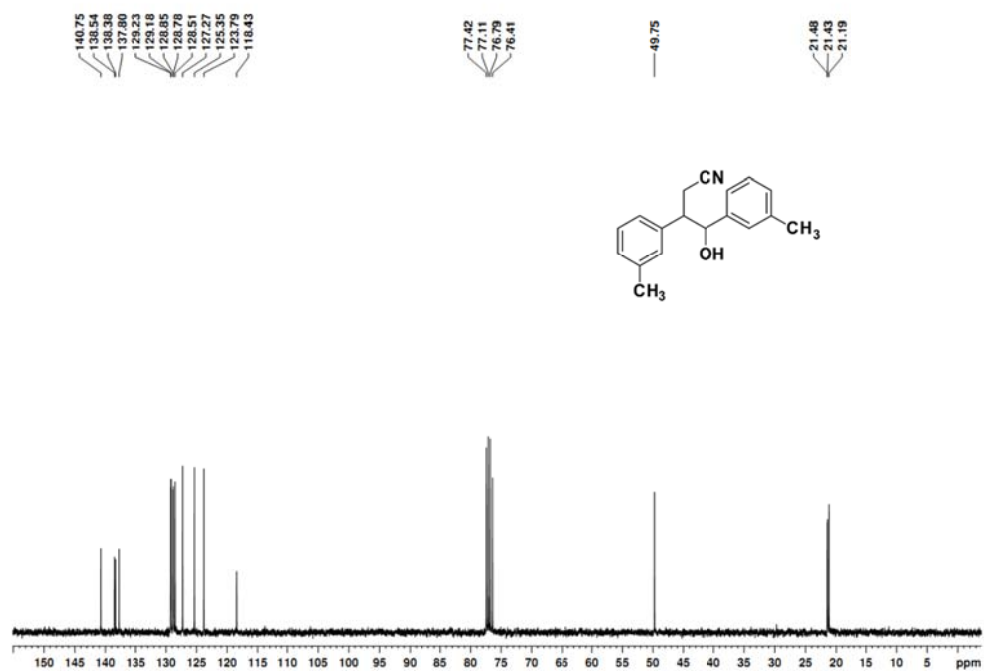

#### 4-hydroxy-3,4-di-p-tolylbutanenitrile (5d)

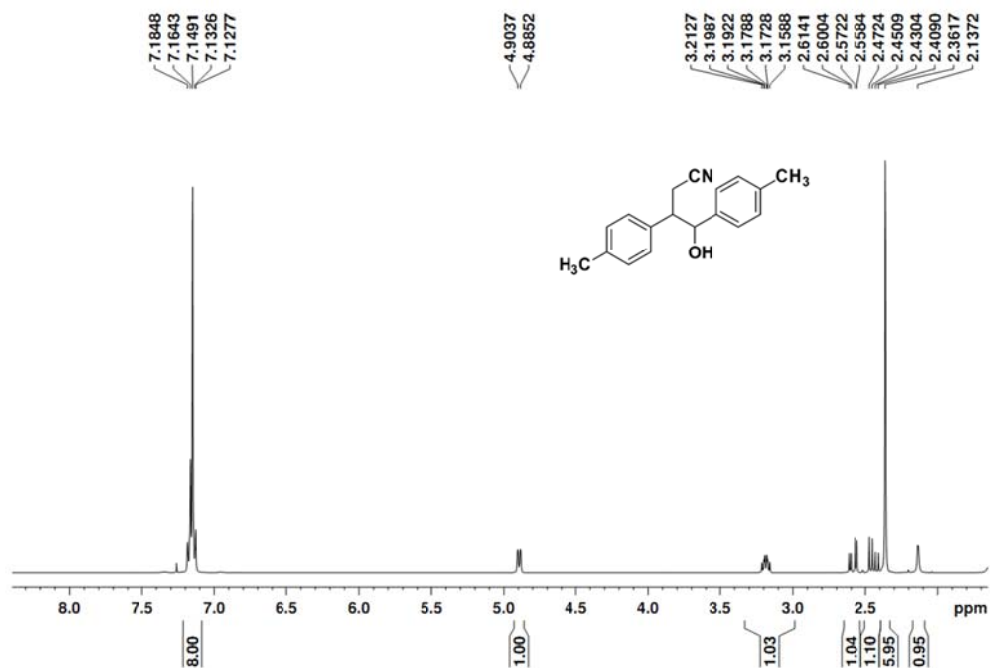



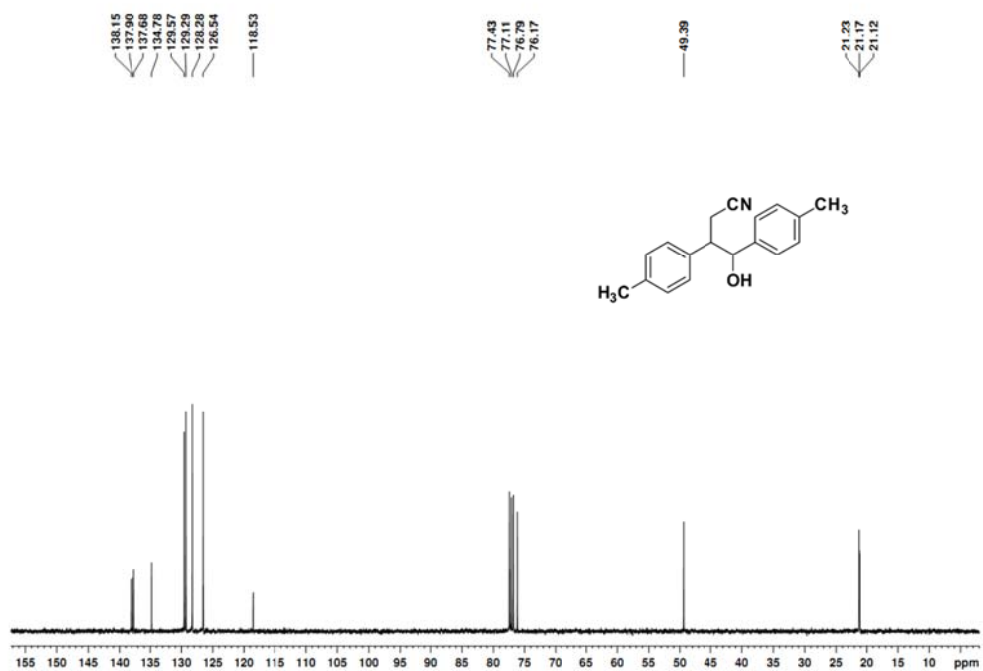

**4-hydroxy-3,4-bis(4-methoxyphenyl)butanenitrile (5e)**

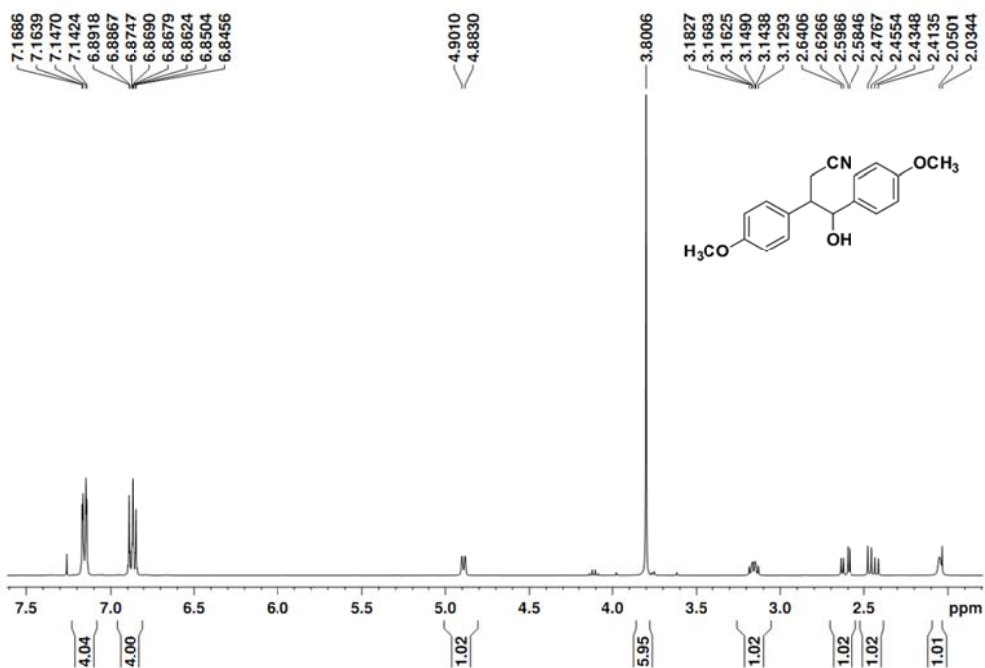

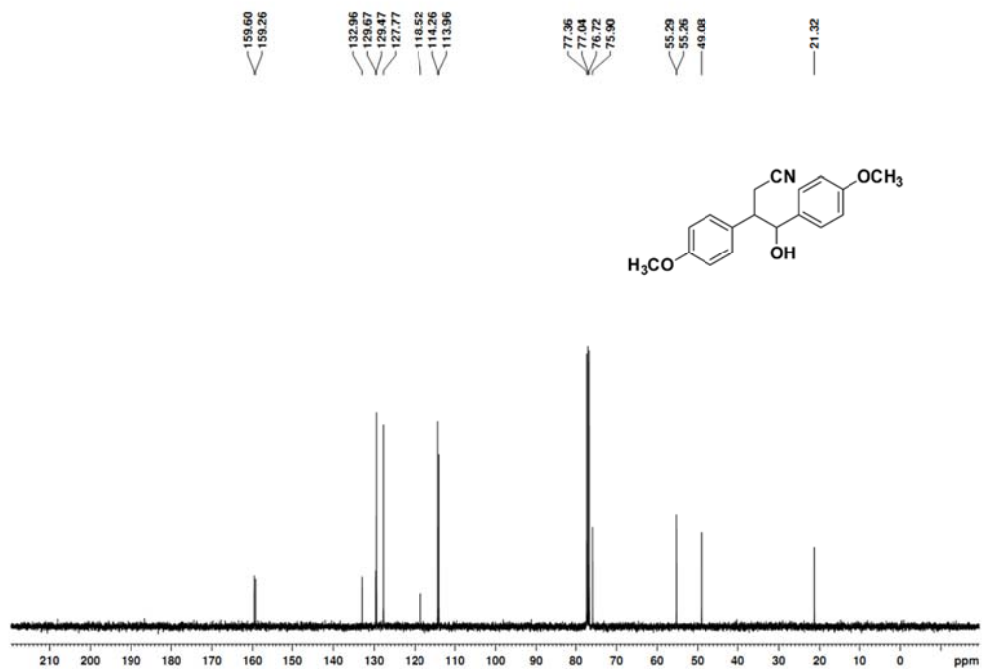

### 3-phenylpyrrolidin-2-one (6)

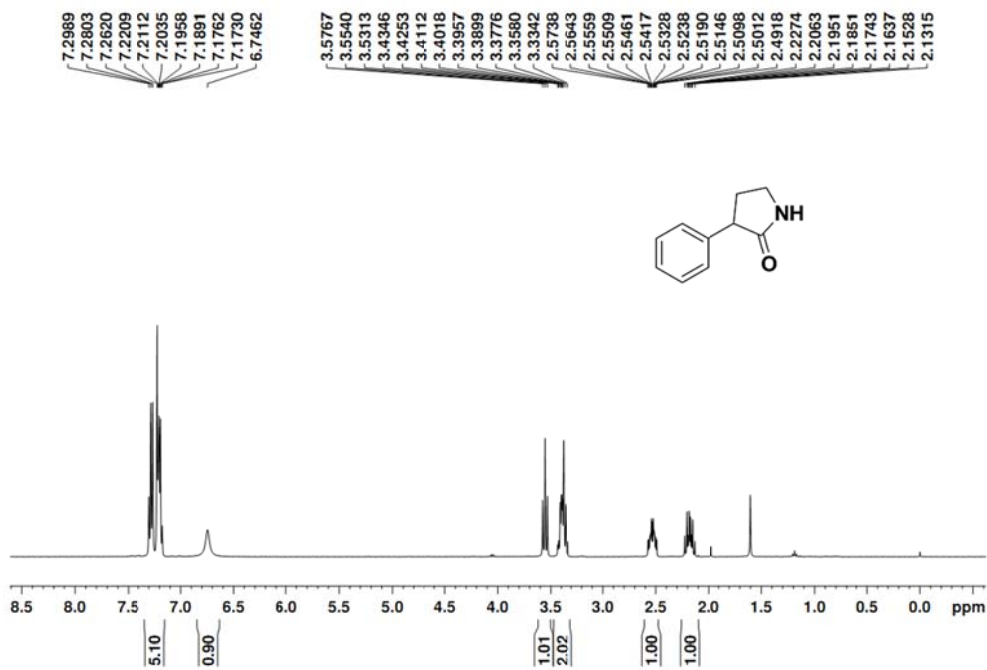

### 3-(4-methoxyphenyl)pyrrolidin-2-one (7)

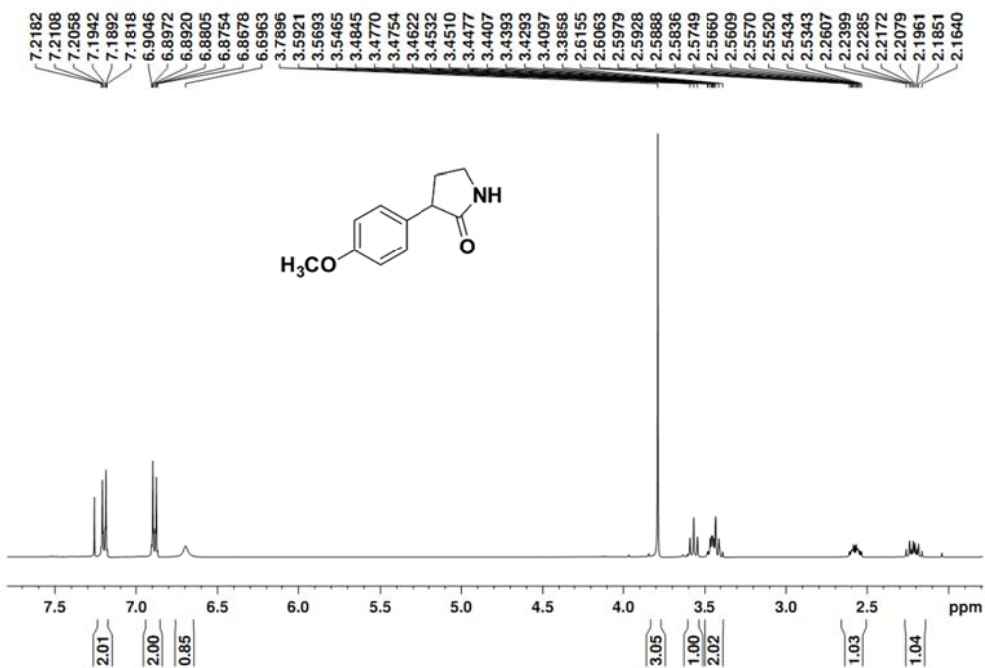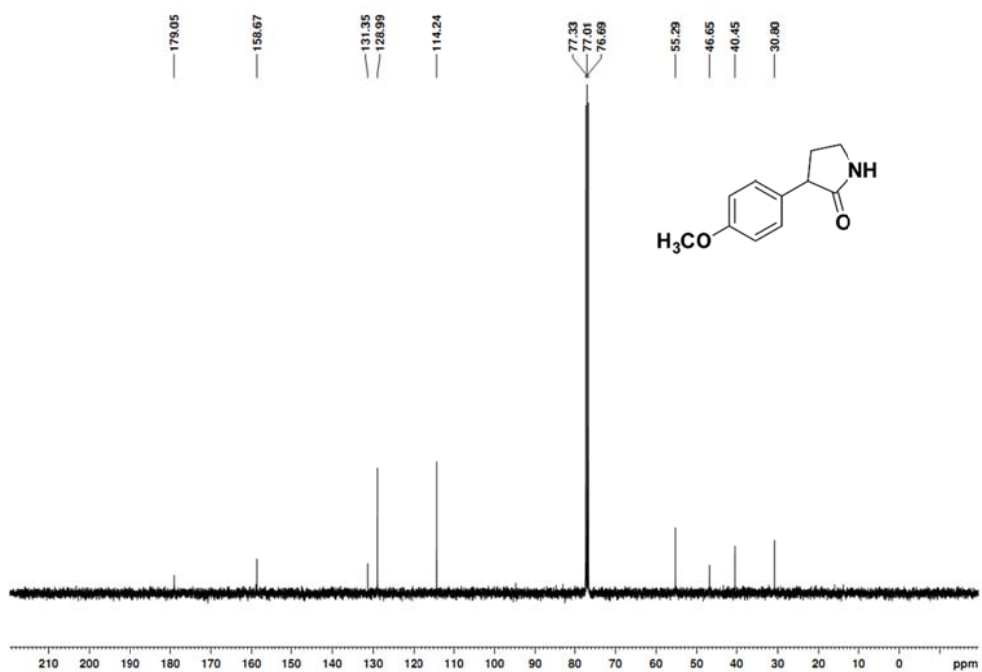

methyl 4-((*tert*-butoxycarbonyl)amino)-2-phenylbutanoate (8)

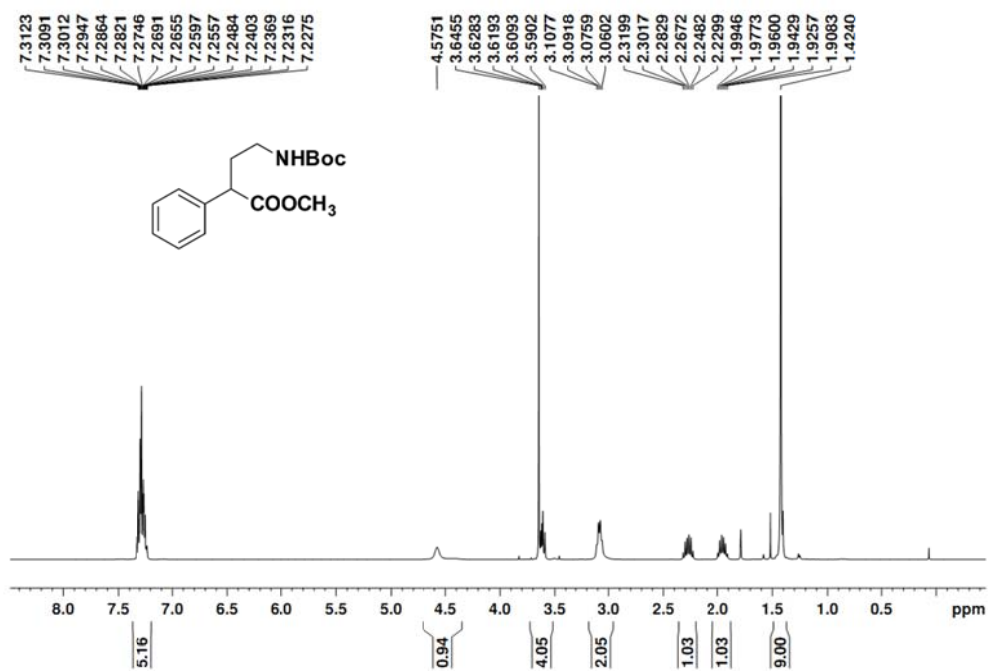

methyl 4-((*tert*-butoxycarbonyl)amino)-2-(4-methoxyphenyl)butanoate (9)

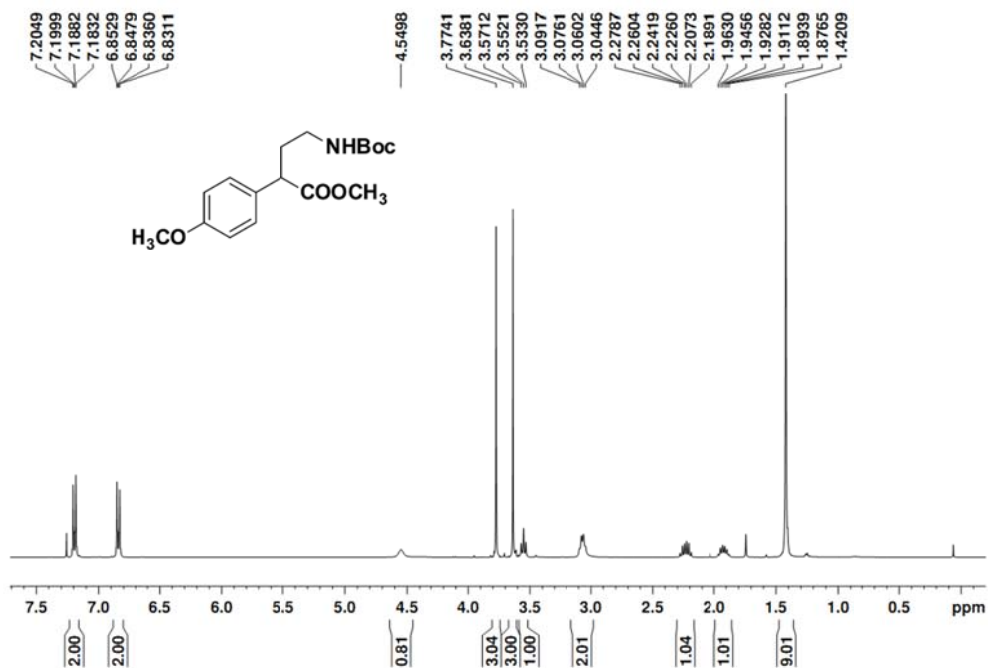

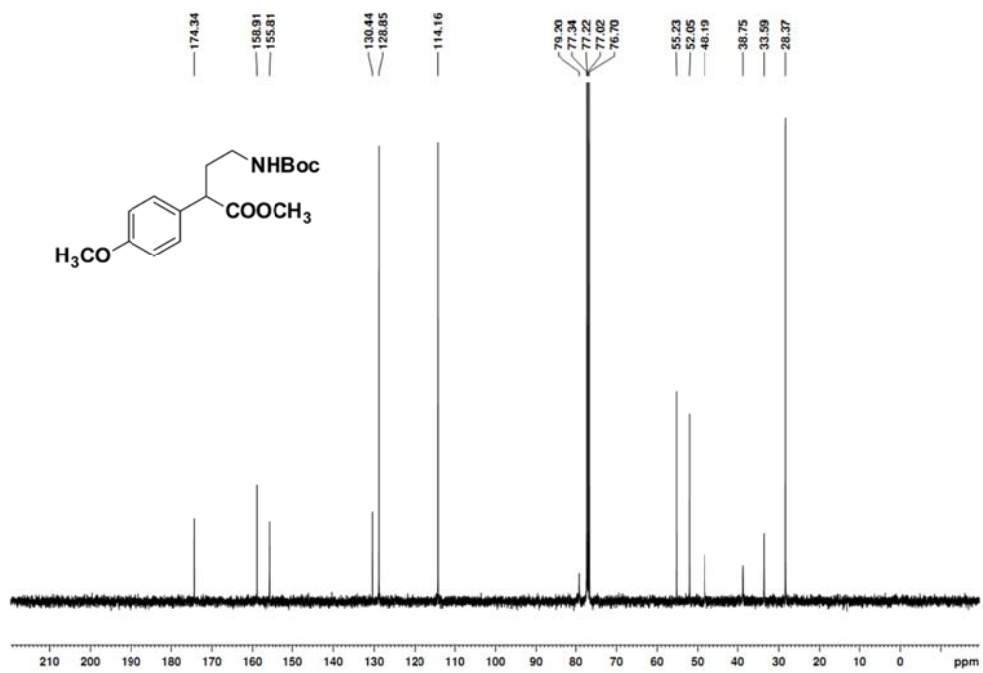

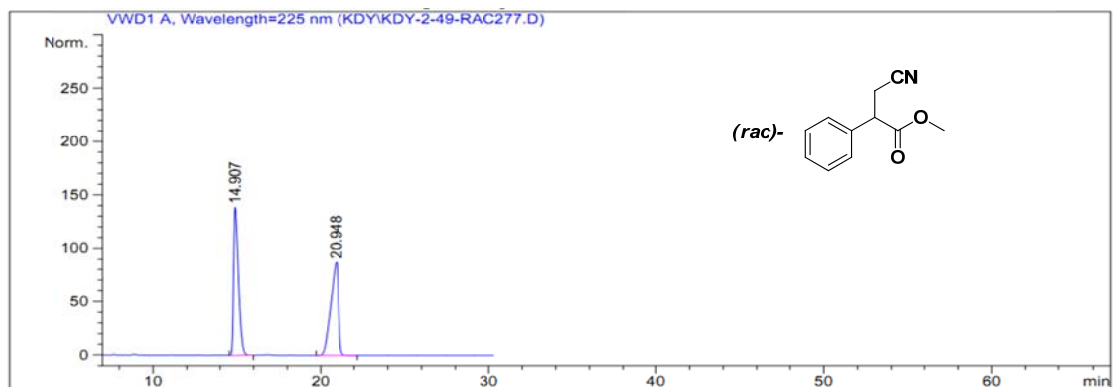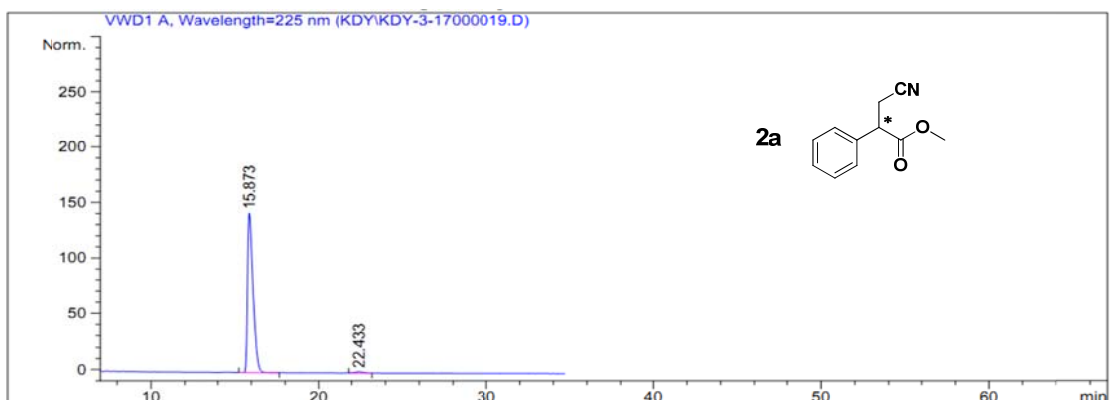

| Peak # | RetTime [min] | Type | Width [min] | Area [mAU*s] | Height [mAU] | Area %  |
|--------|---------------|------|-------------|--------------|--------------|---------|
| 1      | 15.873        | BB   | 0.3424      | 3241.85156   | 143.03450    | 98.9010 |
| 2      | 22.433        | BB   | 0.4694      | 36.02296     | 1.19599      | 1.0990  |

Totals : 3277.87452 144.23049

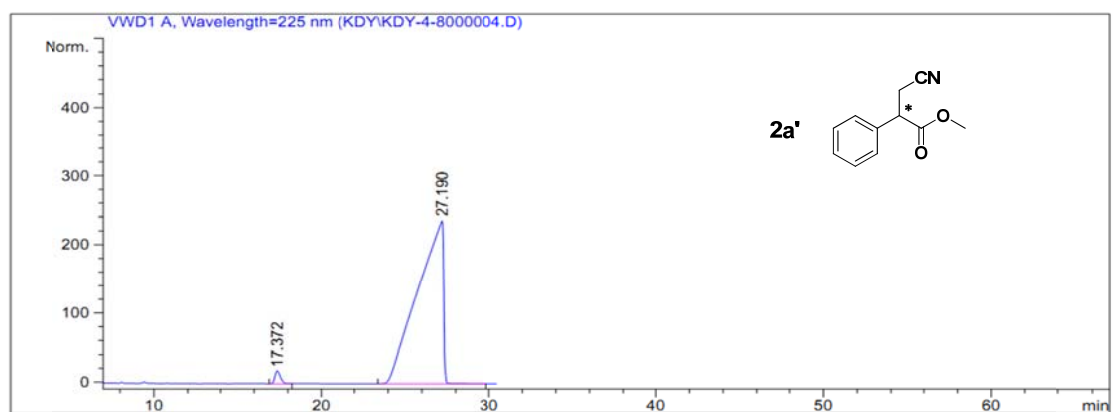

| Peak # | RetTime [min] | Type | Width [min] | Area [mAU*s] | Height [mAU] | Area %  |
|--------|---------------|------|-------------|--------------|--------------|---------|
| 1      | 17.372        | BB   | 0.3523      | 424.35785    | 18.58949     | 1.6652  |
| 2      | 27.190        | BB   | 1.3030      | 2.50592e4    | 237.10426    | 98.3348 |

Totals : 2.54835e4 255.69375

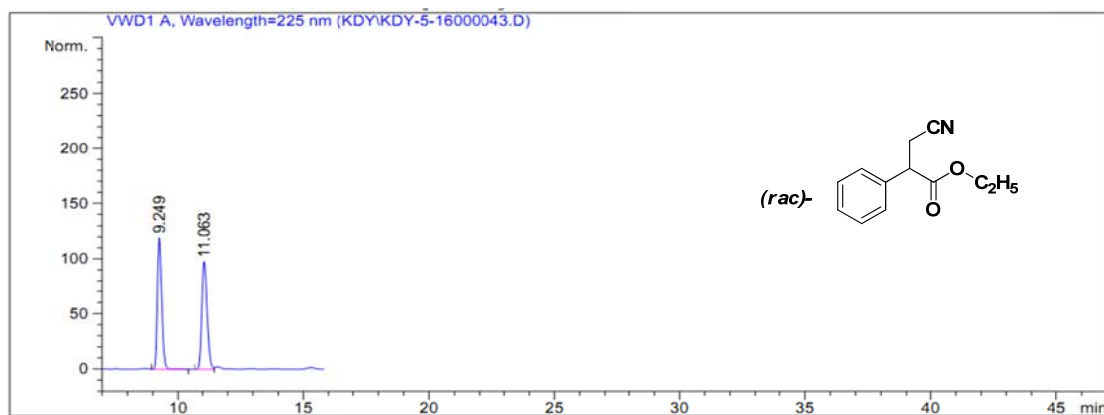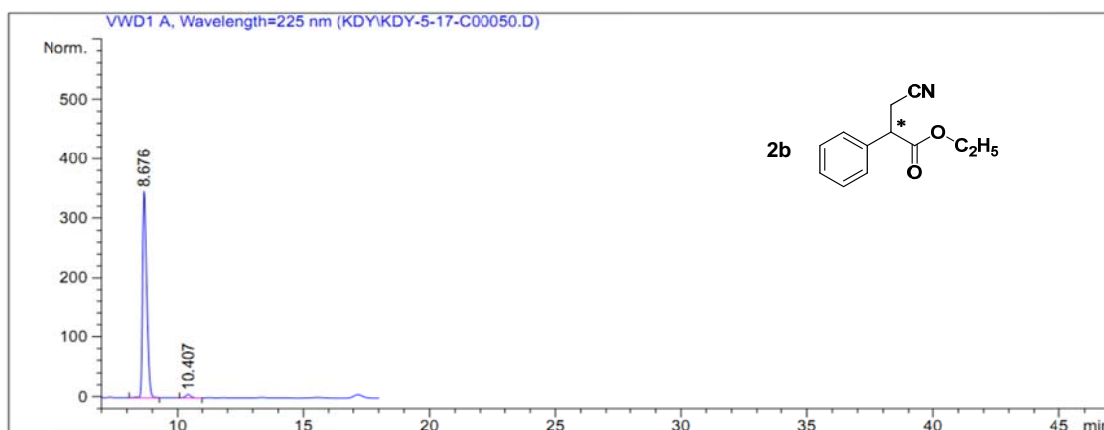

| Peak # | RetTime [min] | Type | Width [min] | Area [mAU*s] | Height [mAU] | Area %  |
|--------|---------------|------|-------------|--------------|--------------|---------|
| 1      | 8.676         | BB   | 0.1747      | 3939.56421   | 346.34445    | 98.1576 |
| 2      | 10.407        | BB   | 0.2077      | 73.94509     | 5.54214      | 1.8424  |

Totals : 4013.50930 351.88659

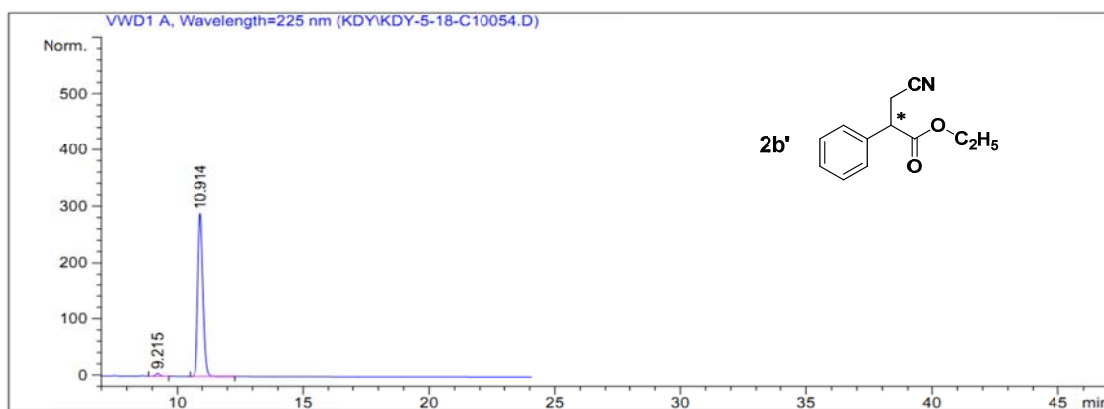

| Peak # | RetTime [min] | Type | Width [min] | Area [mAU*s] | Height [mAU] | Area %  |
|--------|---------------|------|-------------|--------------|--------------|---------|
| 1      | 9.215         | BB   | 0.1844      | 60.21594     | 5.07763      | 1.4240  |
| 2      | 10.914        | BB   | 0.2240      | 4168.49805   | 289.41656    | 98.5760 |

Totals : 4228.71399 294.49420

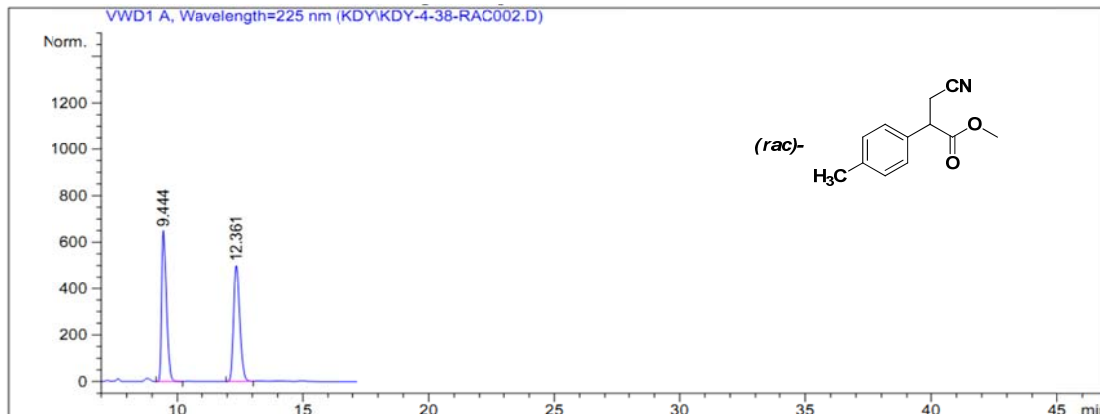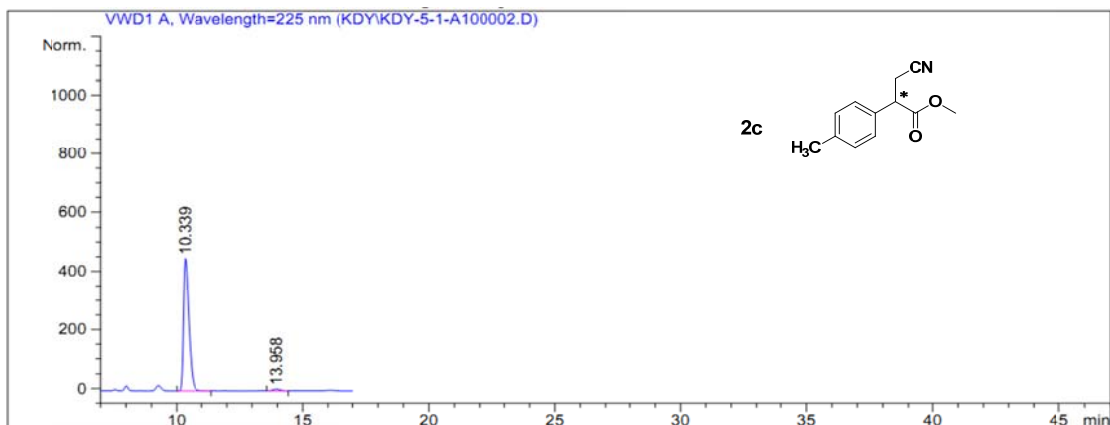

| Peak # | RetTime [min] | Type | Width [min] | Area [mAU*s] | Height [mAU] | Area %  |
|--------|---------------|------|-------------|--------------|--------------|---------|
| 1      | 10.339        | BB   | 0.2285      | 6766.64014   | 452.45413    | 98.1829 |
| 2      | 13.958        | VB   | 0.3123      | 125.23140    | 6.23571      | 1.8171  |

Totals : 6891.87154 458.68984

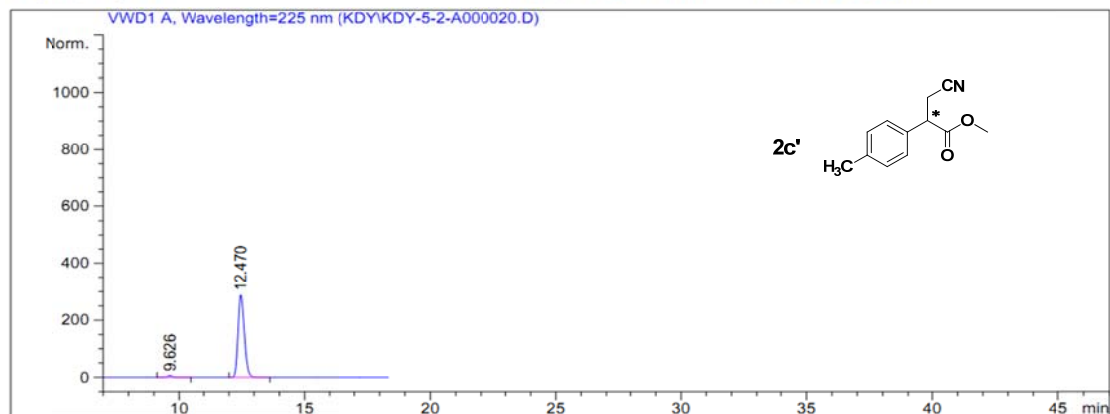

| Peak # | RetTime [min] | Type | Width [min] | Area [mAU*s] | Height [mAU] | Area %  |
|--------|---------------|------|-------------|--------------|--------------|---------|
| 1      | 9.626         | BB   | 0.2159      | 88.79823     | 6.17083      | 1.7572  |
| 2      | 12.470        | BB   | 0.2669      | 4964.63623   | 288.37769    | 98.2428 |

Totals : 5053.43446 294.54852



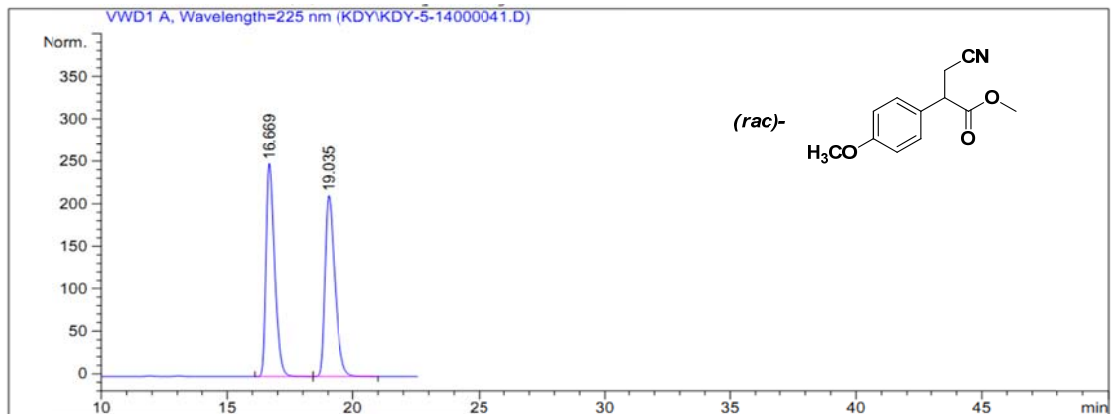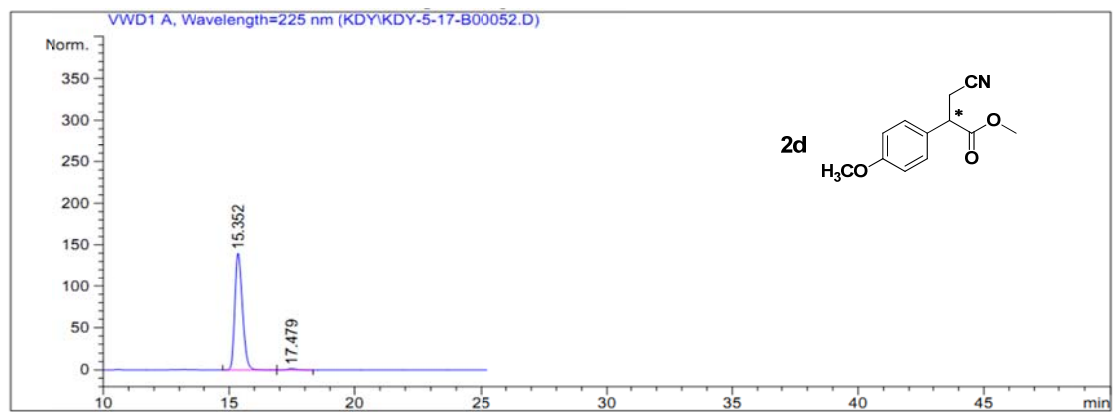

| Peak # | RetTime [min] | Type | Width [min] | Area [mAU*s] | Height [mAU] | Area %  |
|--------|---------------|------|-------------|--------------|--------------|---------|
| 1      | 15.352        | BB   | 0.3215      | 2911.17456   | 140.06287    | 98.7160 |
| 2      | 17.479        | BB   | 0.3804      | 37.86663     | 1.51601      | 1.2840  |

Totals : 2949.04119 141.57888

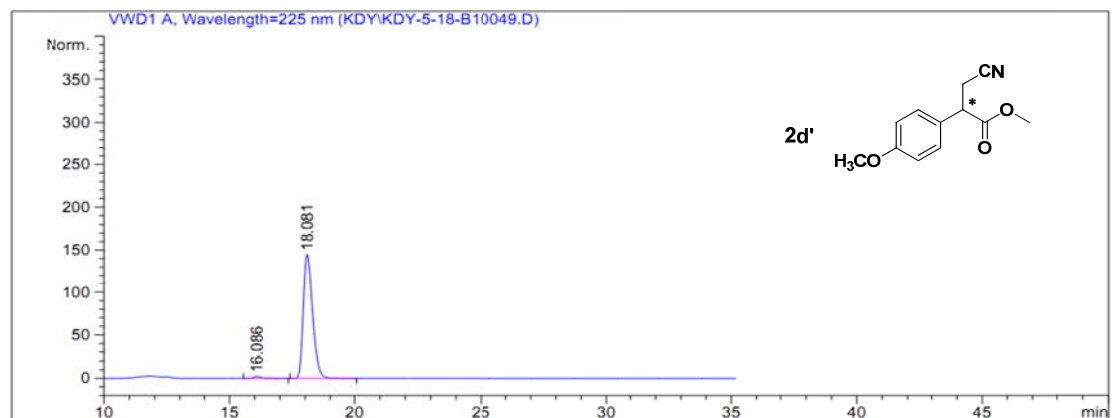

| Peak # | RetTime [min] | Type | Width [min] | Area [mAU*s] | Height [mAU] | Area %  |
|--------|---------------|------|-------------|--------------|--------------|---------|
| 1      | 16.086        | BB   | 0.3781      | 54.34576     | 2.13400      | 1.4488  |
| 2      | 18.081        | BB   | 0.3922      | 3696.61987   | 145.12761    | 98.5512 |

Totals : 3750.96564 147.26161

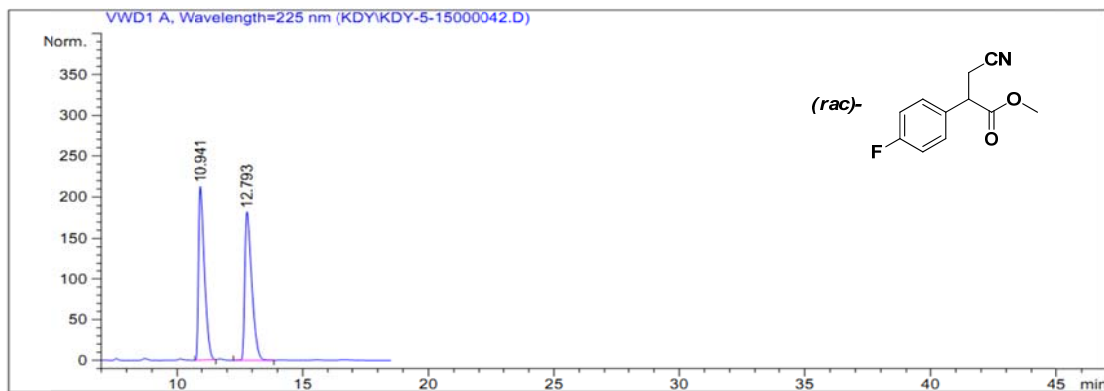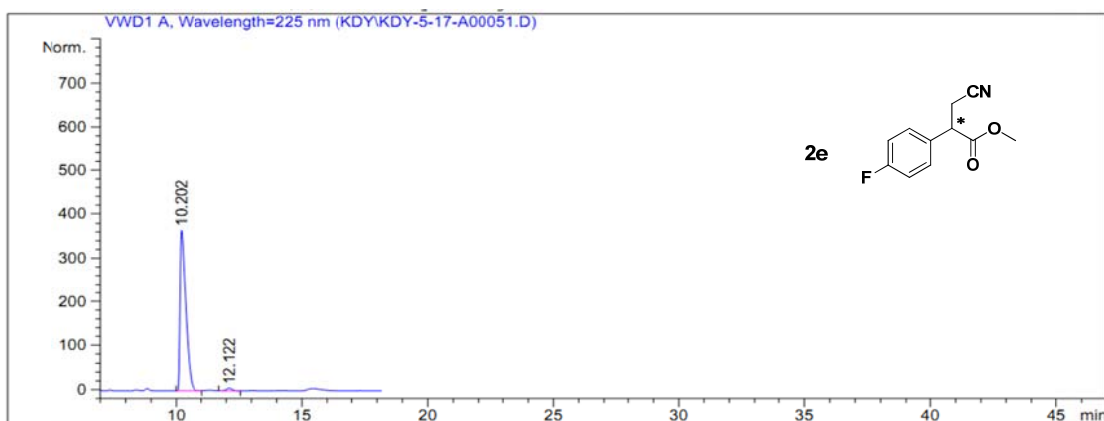

| Peak # | RetTime [min] | Type | Width [min] | Area [mAU*s] | Height [mAU] | Area %  |
|--------|---------------|------|-------------|--------------|--------------|---------|
| 1      | 10.202        | BB   | 0.2340      | 5787.26855   | 367.01065    | 98.4031 |
| 2      | 12.122        | BB   | 0.2477      | 93.91683     | 5.80670      | 1.5969  |

Totals : 5881.18539 372.81735

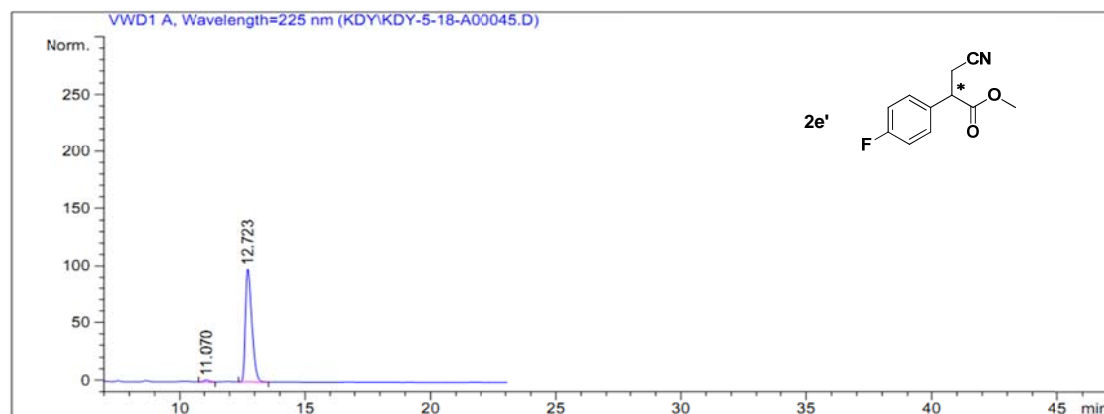

| Peak # | RetTime [min] | Type | Width [min] | Area [mAU*s] | Height [mAU] | Area %  |
|--------|---------------|------|-------------|--------------|--------------|---------|
| 1      | 11.070        | BB   | 0.2153      | 24.27419     | 1.75537      | 1.3833  |
| 2      | 12.723        | BB   | 0.2683      | 1730.53809   | 98.80063     | 98.6167 |

Totals : 1754.81228 100.55600

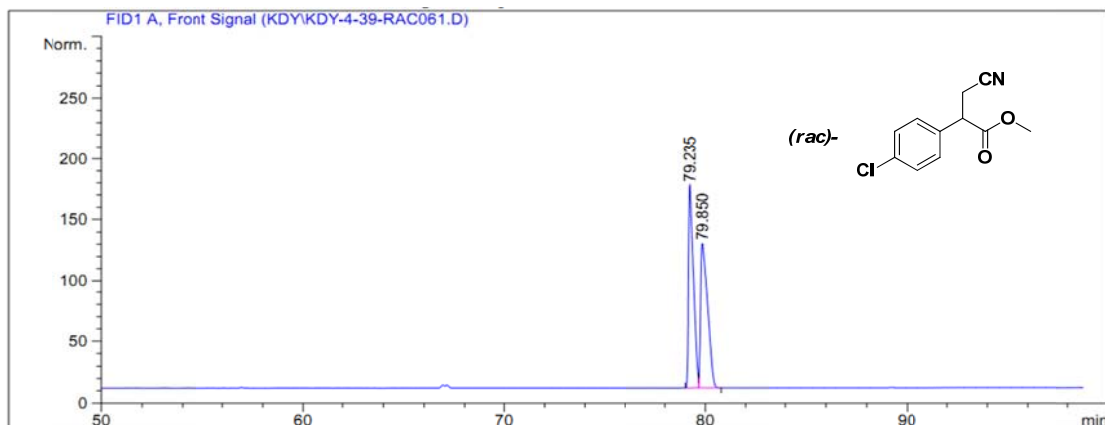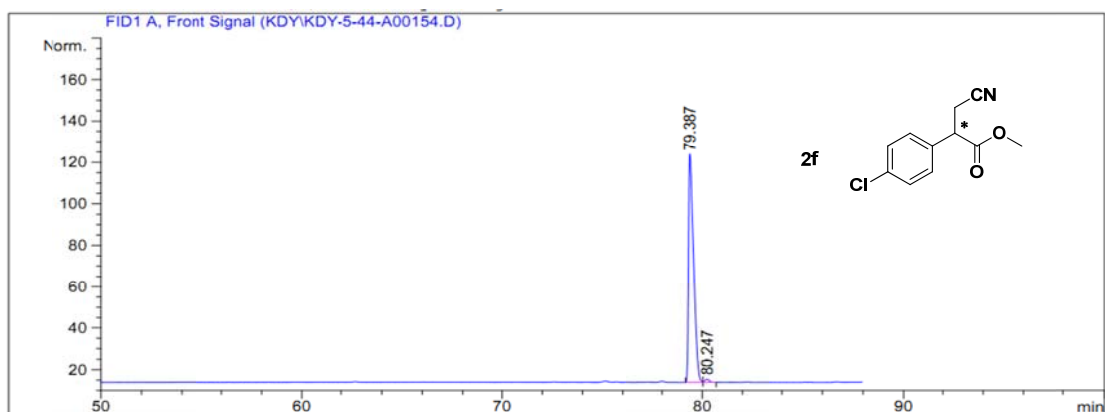

| Peak # | RetTime [min] | Type | Width [min] | Area [pA*s] | Height [pA] | Area %   |
|--------|---------------|------|-------------|-------------|-------------|----------|
| 1      | 79.387        | BV   | 0.2382      | 1911.01758  | 109.82911   | 98.83949 |
| 2      | 80.247        | VB   | 0.2259      | 22.43789    | 1.45876     | 1.16051  |

Totals : 1933.45547 111.28787

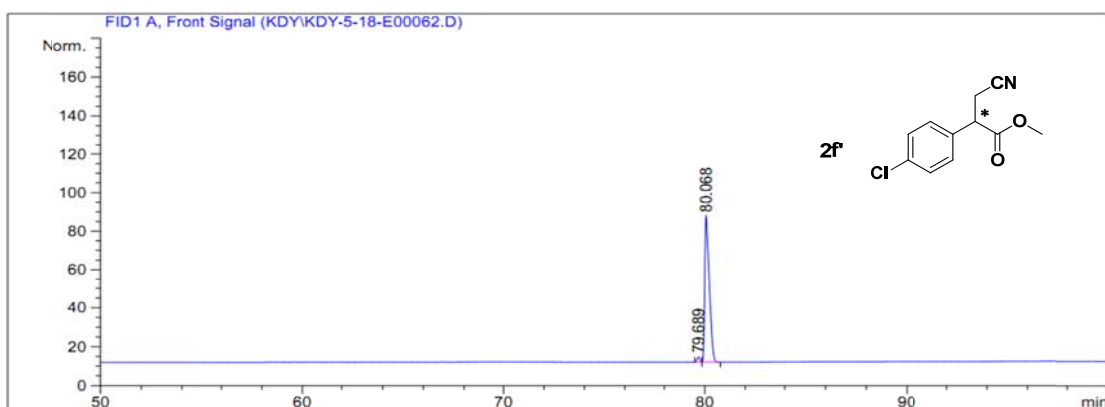

| Peak # | RetTime [min] | Type | Width [min] | Area [pA*s] | Height [pA] | Area %   |
|--------|---------------|------|-------------|-------------|-------------|----------|
| 1      | 79.689        | BV   | 0.1528      | 27.23461    | 2.74018     | 2.24538  |
| 2      | 80.068        | VB   | 0.2142      | 1185.68140  | 75.93608    | 97.75462 |

Totals : 1212.91601 78.67627

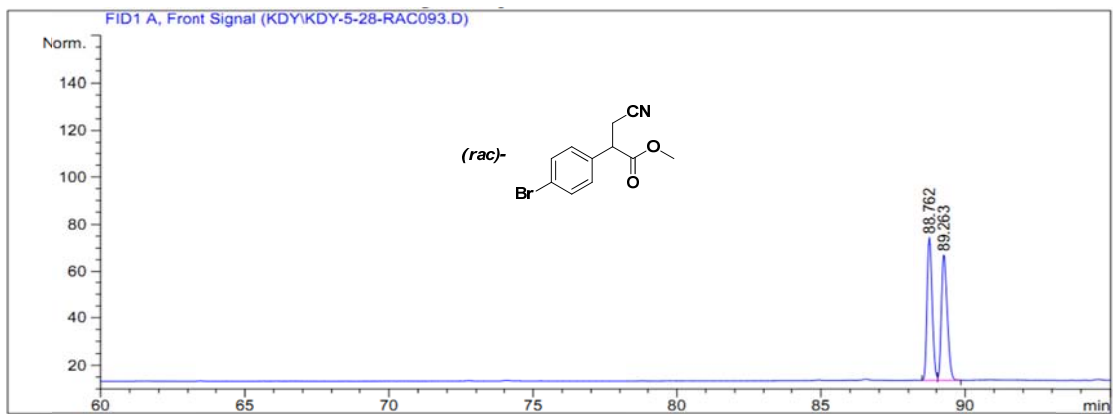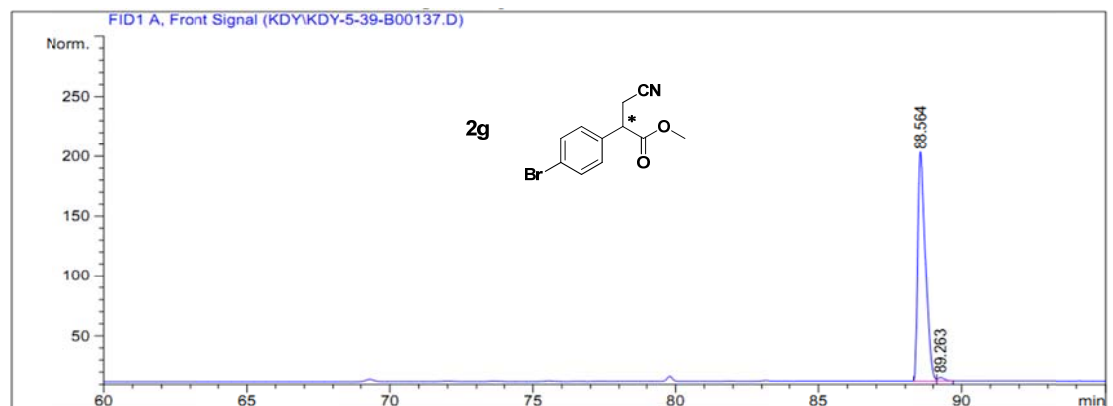

| Peak # | RetTime [min] | Type | Width [min] | Area [pA*s] | Height [pA] | Area %   |
|--------|---------------|------|-------------|-------------|-------------|----------|
| 1      | 88.564        | BV   | 0.2619      | 3536.63452  | 190.01071   | 98.70361 |
| 2      | 89.263        | VB   | 0.2511      | 46.45083    | 2.92079     | 1.29639  |

Totals : 3583.08535 192.93150

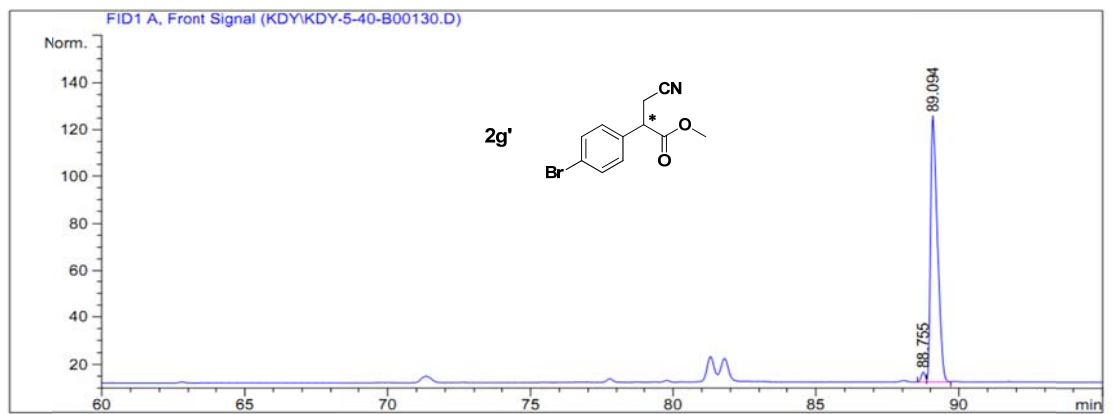

| Peak # | RetTime [min] | Type | Width [min] | Area [pA*s] | Height [pA] | Area %   |
|--------|---------------|------|-------------|-------------|-------------|----------|
| 1      | 88.755        | BV   | 0.1518      | 40.58226    | 4.23605     | 2.11004  |
| 2      | 89.094        | VV   | 0.2450      | 1882.71082  | 113.35958   | 97.88996 |

Totals : 1923.29307 117.59563

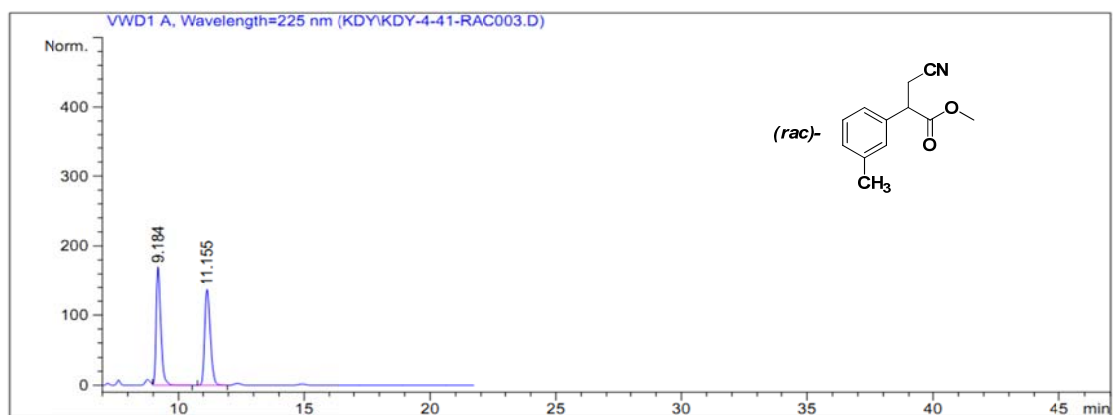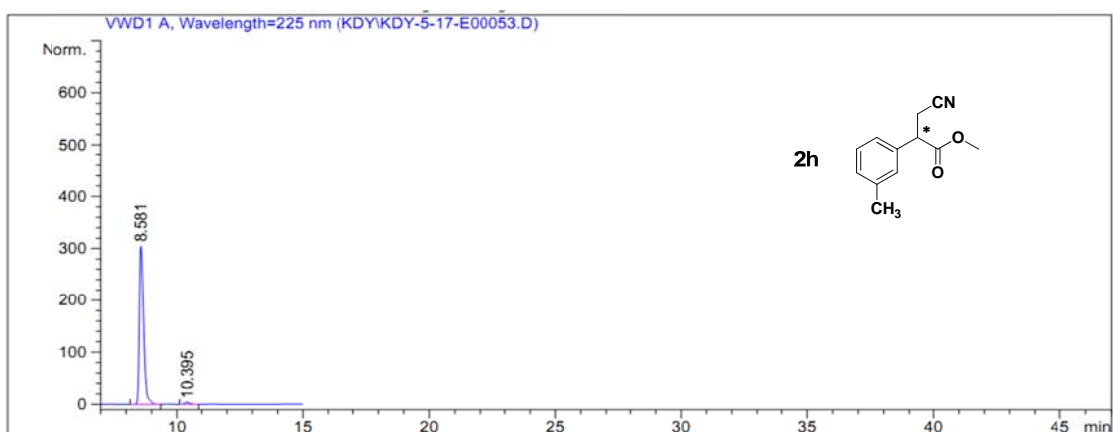

| Peak # | RetTime [min] | Type | Width [min] | Area [mAU*s] | Height [mAU] | Area %  |
|--------|---------------|------|-------------|--------------|--------------|---------|
| 1      | 8.581         | BB   | 0.1774      | 3533.03247   | 304.37949    | 98.4946 |
| 2      | 10.395        | BB   | 0.2168      | 53.99898     | 3.84631      | 1.5054  |

Totals : 3587.03145 308.22580

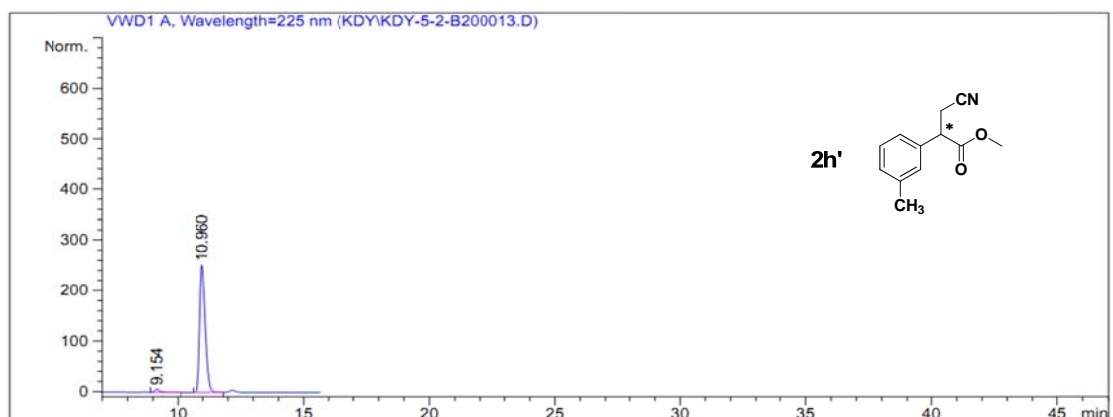

| Peak # | RetTime [min] | Type | Width [min] | Area [mAU*s] | Height [mAU] | Area %  |
|--------|---------------|------|-------------|--------------|--------------|---------|
| 1      | 9.154         | BB   | 0.1937      | 76.93291     | 6.03612      | 1.9520  |
| 2      | 10.960        | BB   | 0.2368      | 3864.22168   | 252.20273    | 98.0480 |

Totals : 3941.15459 258.23884

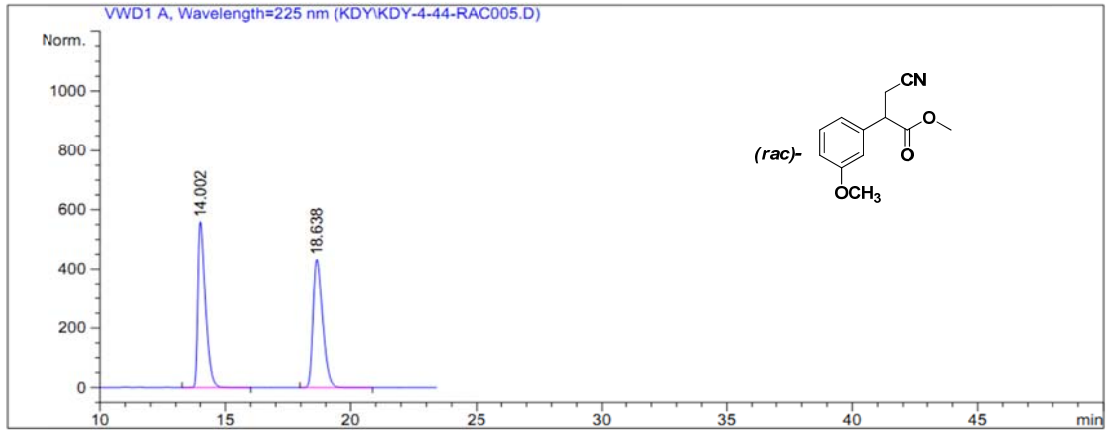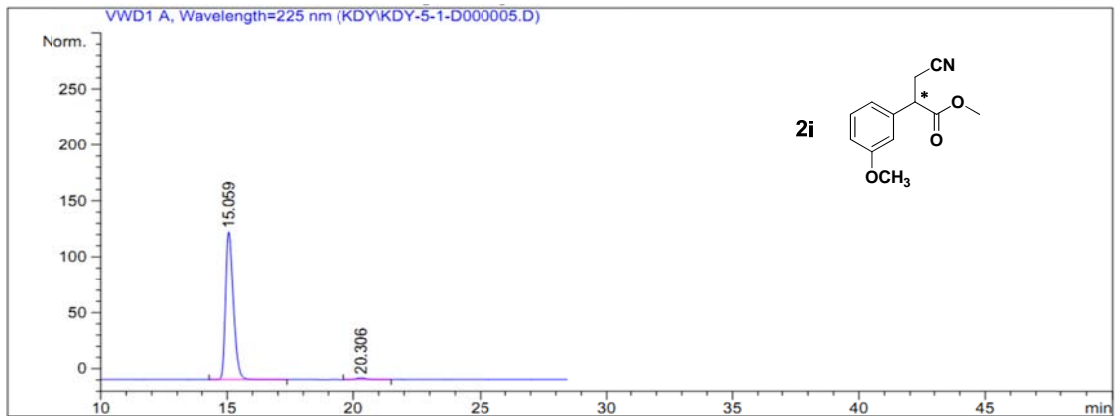

| Peak # | RetTime [min] | Type | Width [min] | Area [mAU*s] | Height [mAU] | Area %  |
|--------|---------------|------|-------------|--------------|--------------|---------|
| 1      | 15.059        | BB   | 0.3270      | 2815.07251   | 131.90784    | 98.3890 |
| 2      | 20.306        | BB   | 0.4649      | 46.09264     | 1.46182      | 1.6110  |

Totals : 2861.16515 133.36966

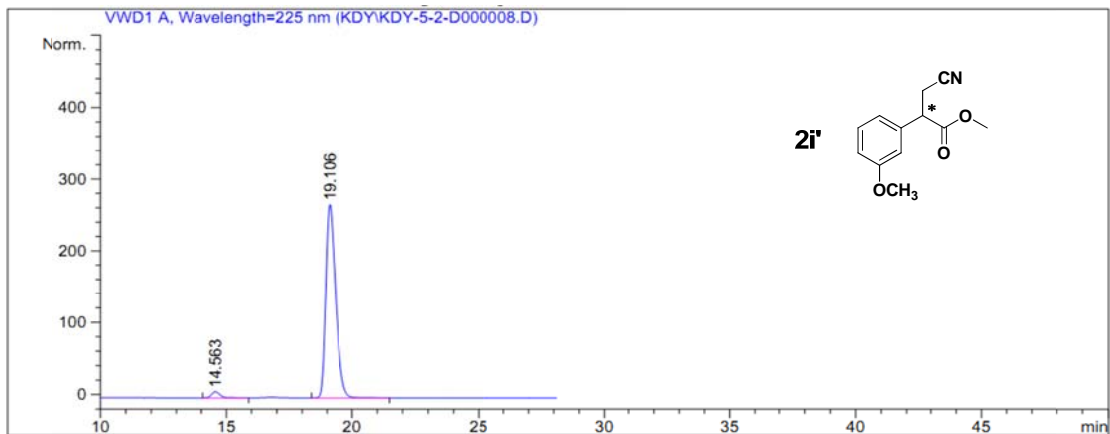

| Peak # | RetTime [min] | Type | Width [min] | Area [mAU*s] | Height [mAU] | Area %  |
|--------|---------------|------|-------------|--------------|--------------|---------|
| 1      | 14.563        | BB   | 0.3530      | 189.13026    | 8.32678      | 2.4916  |
| 2      | 19.106        | BB   | 0.4243      | 7401.45557   | 268.78909    | 97.5084 |

Totals : 7590.58583 277.11587

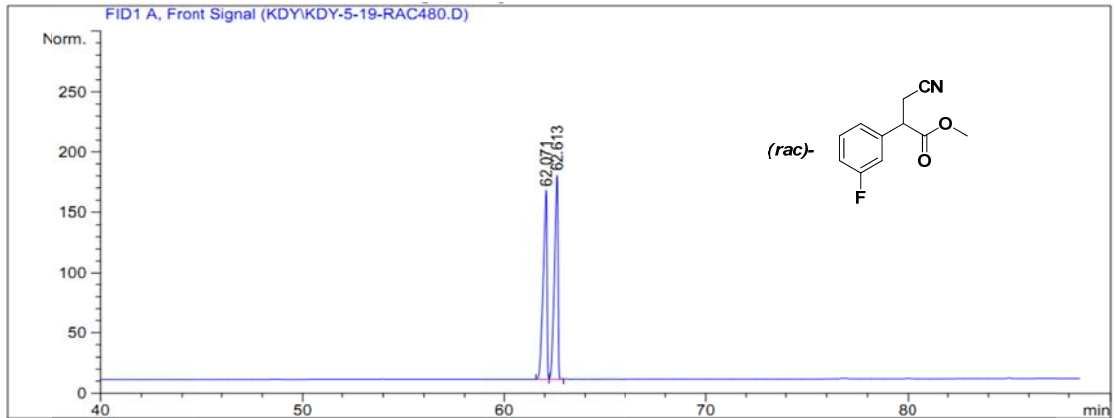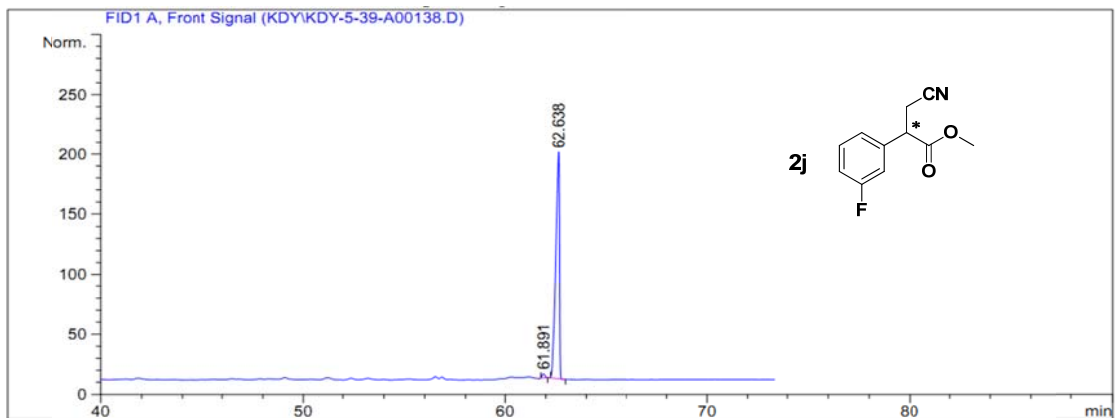

| Peak # | RetTime [min] | Type | Width [min] | Area [pA*s] | Height [pA] | Area %   |
|--------|---------------|------|-------------|-------------|-------------|----------|
| 1      | 61.891        | BB   | 0.1397      | 33.57148    | 3.50766     | 1.40908  |
| 2      | 62.638        | BB   | 0.1717      | 2348.93384  | 188.63130   | 98.59092 |

Totals : 2382.50532 192.13896

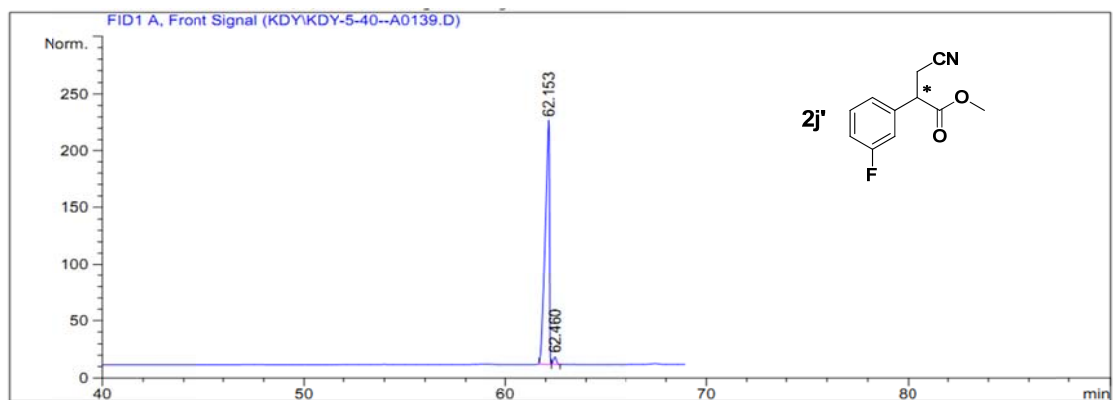

| Peak # | RetTime [min] | Type | Width [min] | Area [pA*s] | Height [pA] | Area %   |
|--------|---------------|------|-------------|-------------|-------------|----------|
| 1      | 62.153        | BV   | 0.1893      | 3161.77979  | 214.87210   | 97.92123 |
| 2      | 62.460        | VB   | 0.1575      | 67.12135    | 6.48967     | 2.07877  |

Totals : 3228.90114 221.36177

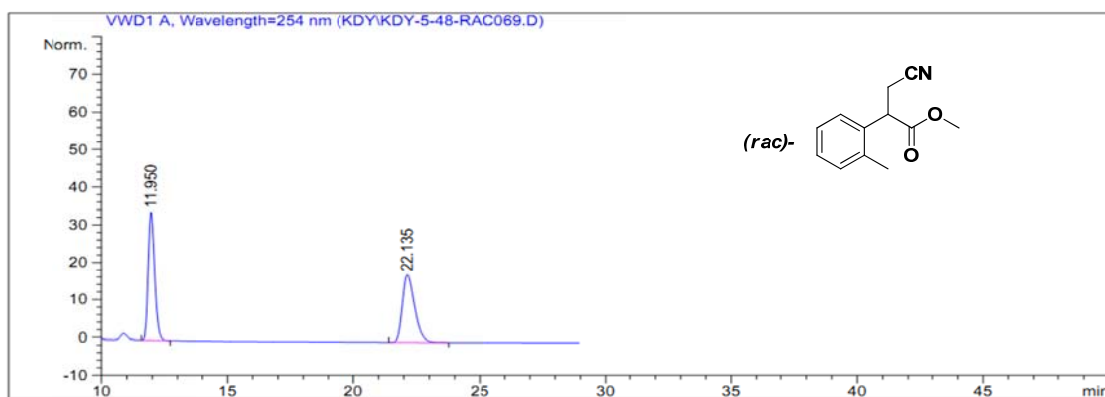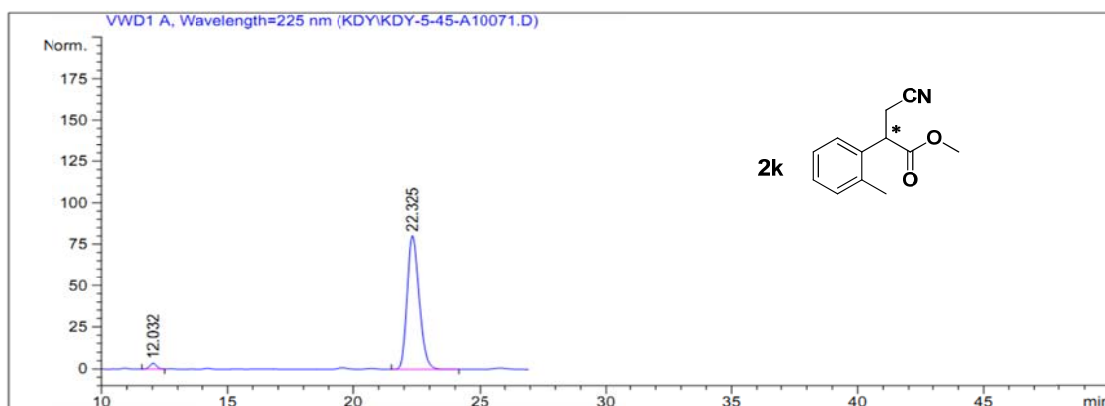

| Peak # | RetTime [min] | Type | Width [min] | Area [mAU*s] | Height [mAU] | Area %  |
|--------|---------------|------|-------------|--------------|--------------|---------|
| 1      | 12.032        | BB   | 0.2804      | 63.37100     | 3.48141      | 2.3506  |
| 2      | 22.325        | BB   | 0.5063      | 2632.54102   | 80.33986     | 97.6494 |

Totals : 2695.91202 83.82126

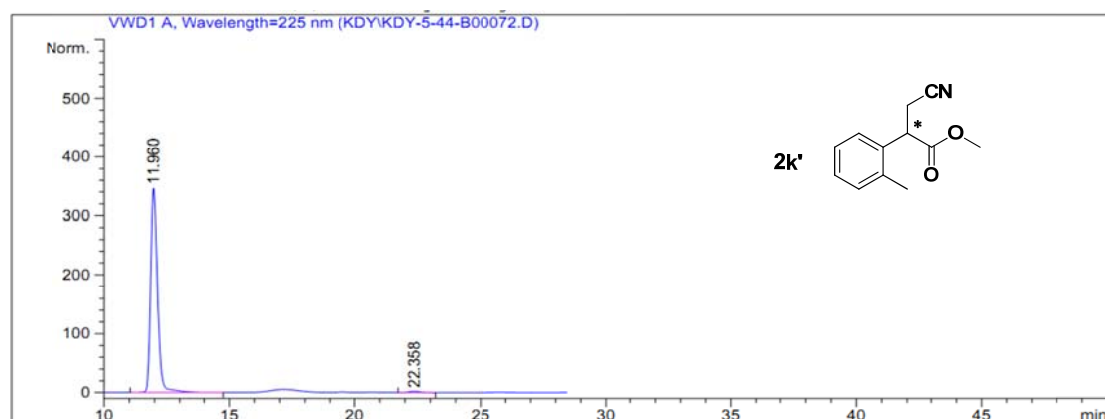

| Peak # | RetTime [min] | Type | Width [min] | Area [mAU*s] | Height [mAU] | Area %  |
|--------|---------------|------|-------------|--------------|--------------|---------|
| 1      | 11.960        | BB   | 0.2903      | 6575.87451   | 346.62399    | 99.0335 |
| 2      | 22.358        | BB   | 0.4789      | 64.17606     | 2.04043      | 0.9665  |

Totals : 6640.05057 348.66443



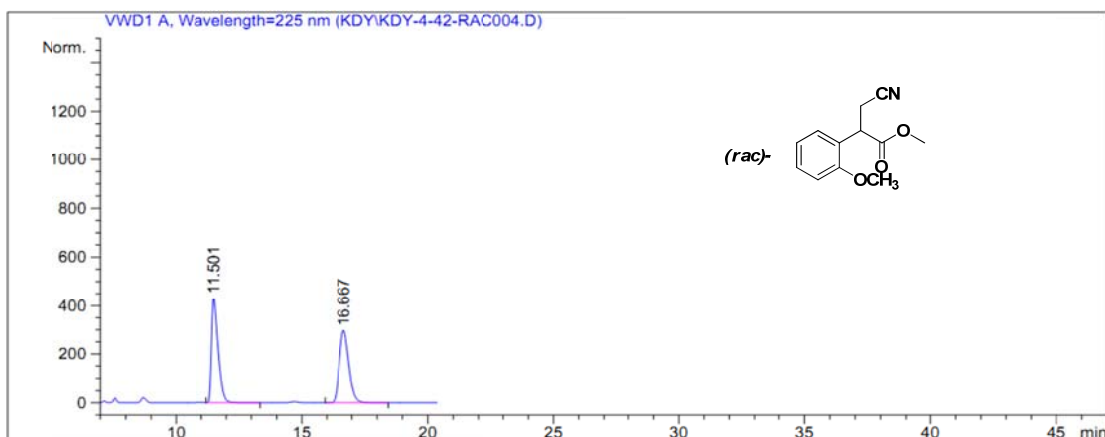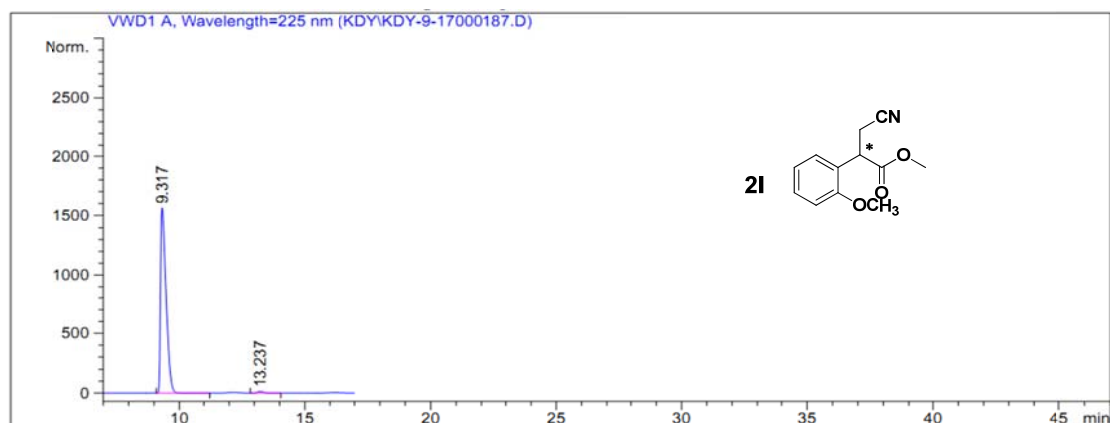

| Peak # | RetTime [min] | Type | Width [min] | Area [mAU*s] | Height [mAU] | Area %  |
|--------|---------------|------|-------------|--------------|--------------|---------|
| 1      | 9.317         | BB   | 0.2310      | 2.35985e4    | 1564.02197   | 98.9183 |
| 2      | 13.237        | BB   | 0.2963      | 258.04868    | 13.47935     | 1.0817  |

Totals : 2.38566e4 1577.50132

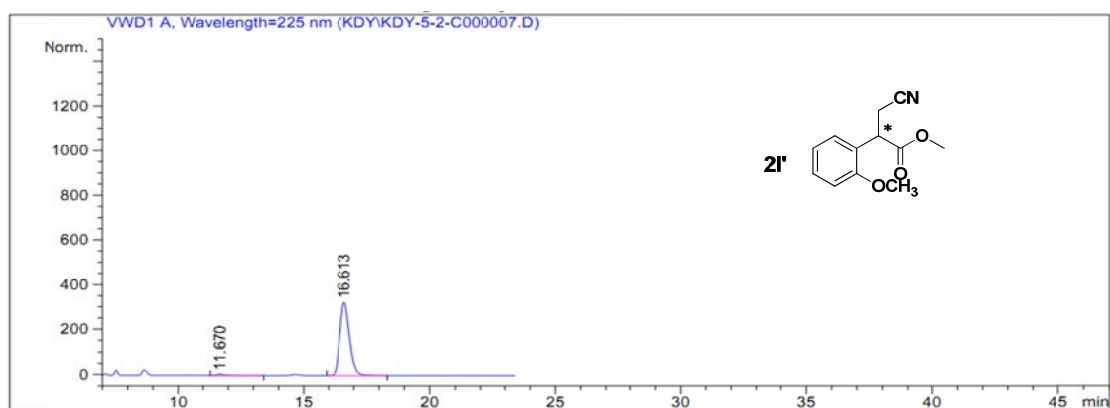

| Peak # | RetTime [min] | Type | Width [min] | Area [mAU*s] | Height [mAU] | Area %  |
|--------|---------------|------|-------------|--------------|--------------|---------|
| 1      | 11.670        | BB   | 0.2880      | 98.81751     | 5.21548      | 1.1297  |
| 2      | 16.613        | BB   | 0.4132      | 8648.57422   | 324.18219    | 98.8703 |

Totals : 8747.39173 329.39767

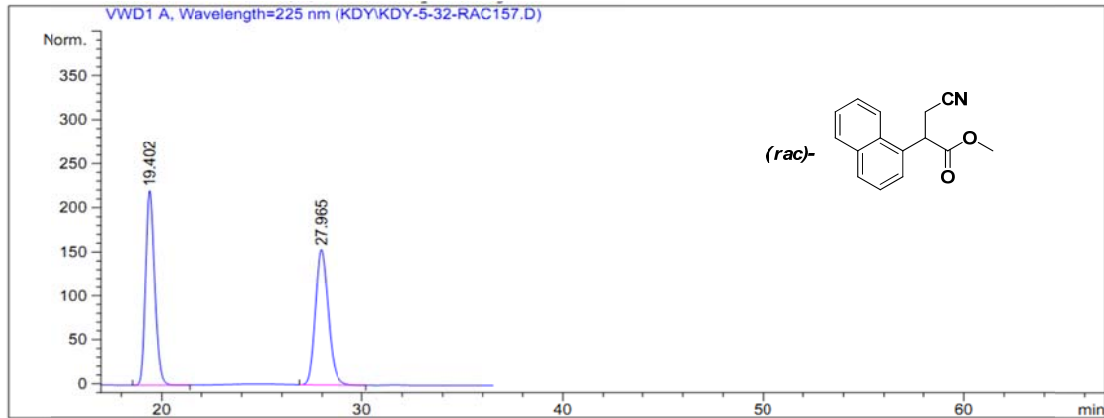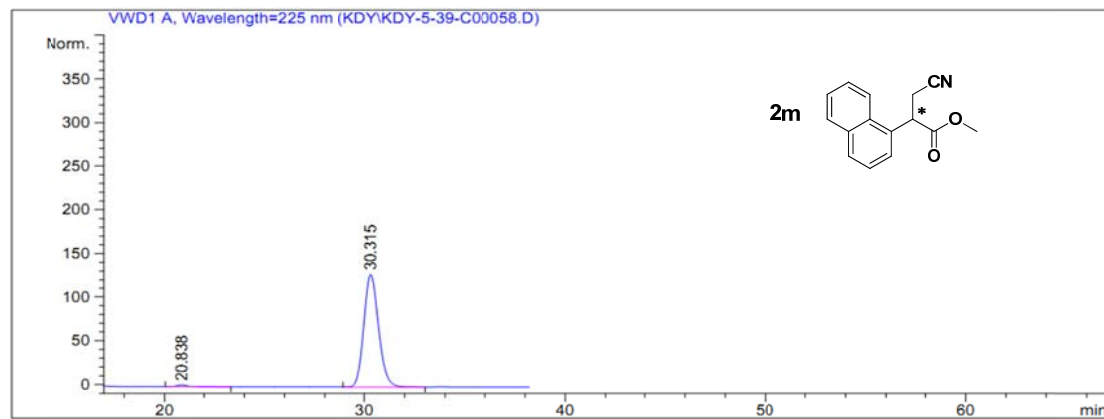

| Peak # | RetTime [min] | Type | Width [min] | Area [mAU*s] | Height [mAU] | Area %  |
|--------|---------------|------|-------------|--------------|--------------|---------|
| 1      | 20.838        | BB   | 0.5471      | 67.64568     | 1.91977      | 1.0304  |
| 2      | 30.315        | BB   | 0.7803      | 6497.66455   | 128.85123    | 98.9696 |

Totals : 6565.31023 130.77100

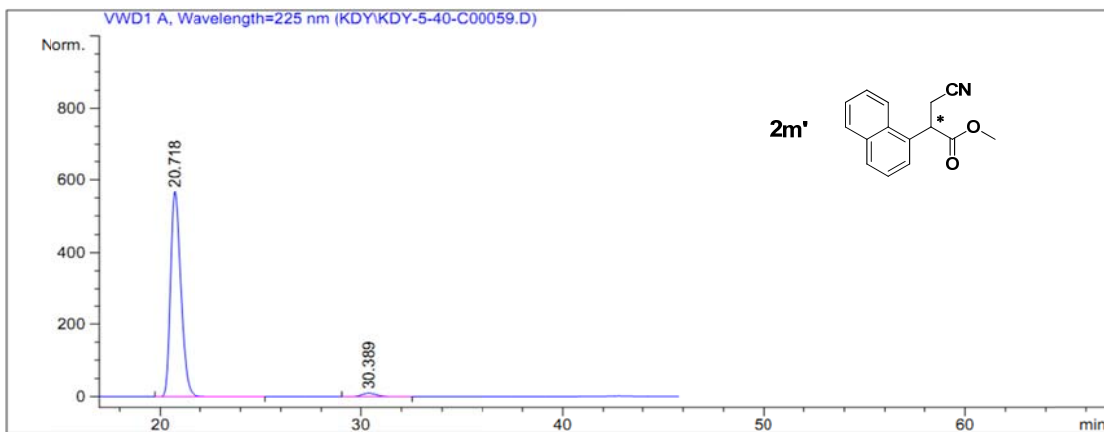

| Peak # | RetTime [min] | Type | Width [min] | Area [mAU*s] | Height [mAU] | Area %  |
|--------|---------------|------|-------------|--------------|--------------|---------|
| 1      | 20.718        | BB   | 0.5541      | 2.01478e4    | 567.59796    | 97.6317 |
| 2      | 30.389        | BB   | 0.7907      | 488.73932    | 9.52407      | 2.3683  |

Totals : 2.06365e4 577.12203

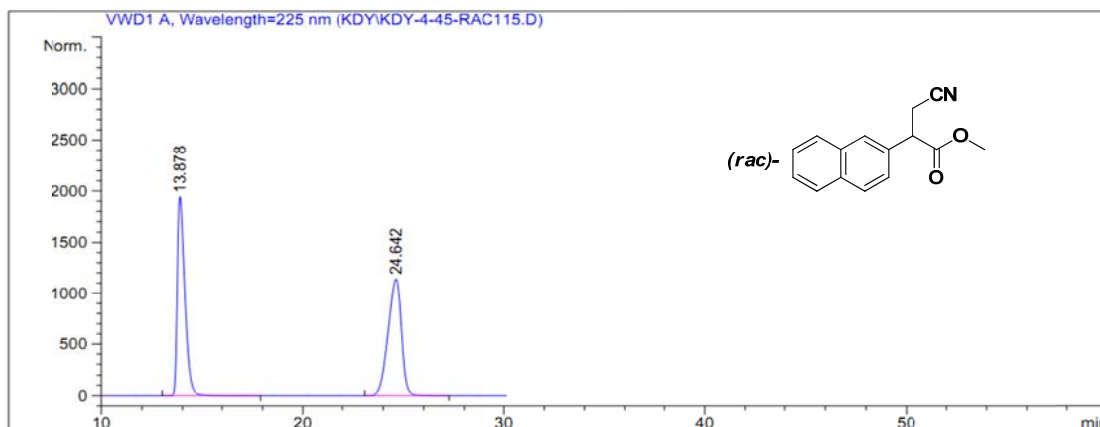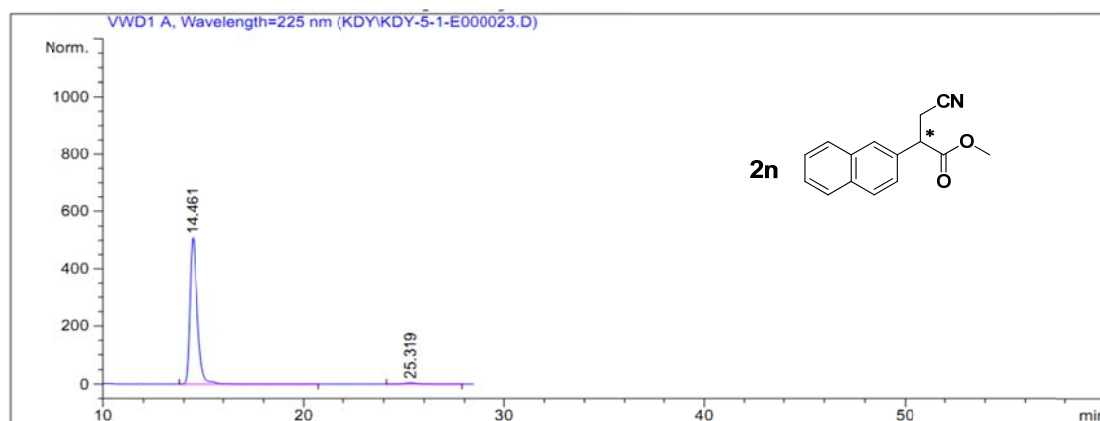

| Peak # | RetTime [min] | Type | Width [min] | Area [mAU*s] | Height [mAU] | Area %  |
|--------|---------------|------|-------------|--------------|--------------|---------|
| 1      | 14.461        | BB   | 0.4060      | 1.35195e4    | 508.84369    | 98.4749 |
| 2      | 25.319        | BB   | 0.7354      | 209.37592    | 4.39823      | 1.5251  |

Totals : 1.37289e4 513.24192

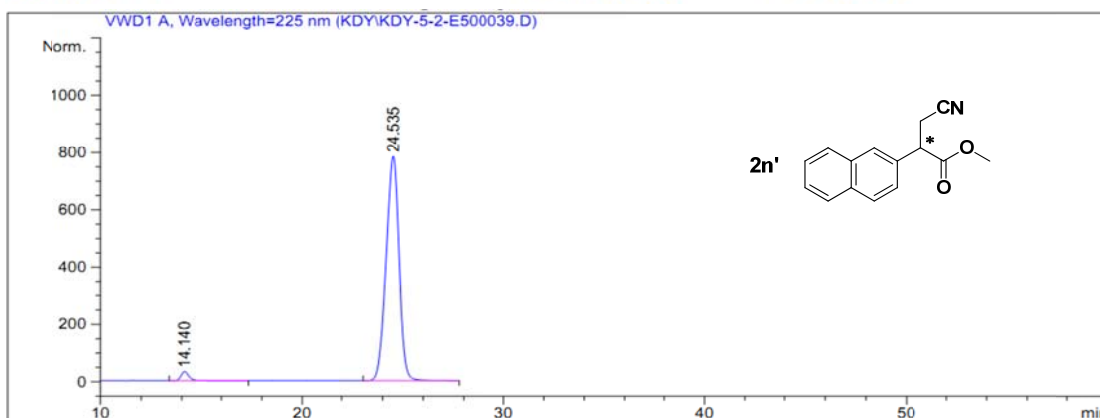

| Peak # | RetTime [min] | Type | Width [min] | Area [mAU*s] | Height [mAU] | Area %  |
|--------|---------------|------|-------------|--------------|--------------|---------|
| 1      | 14.140        | VB   | 0.4170      | 860.56268    | 31.67190     | 2.4228  |
| 2      | 24.535        | BBA  | 0.6926      | 3.46588e4    | 782.71899    | 97.5772 |

Totals : 3.55194e4 814.39090

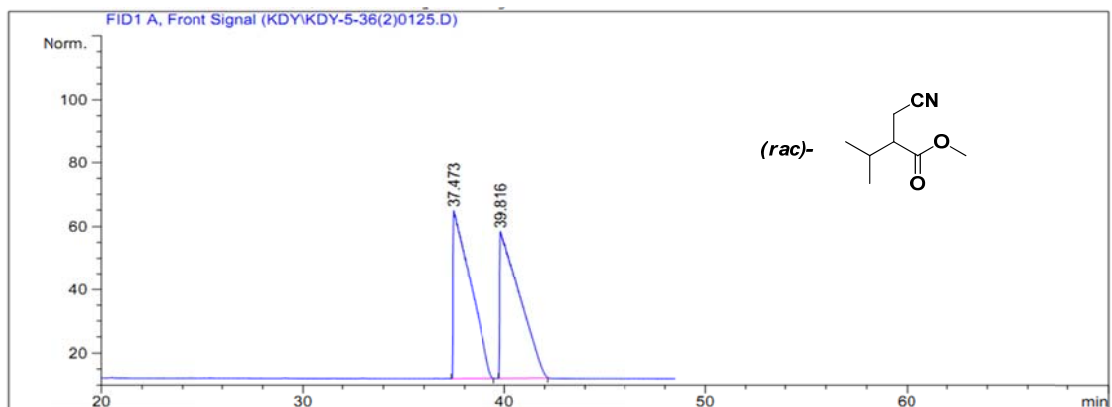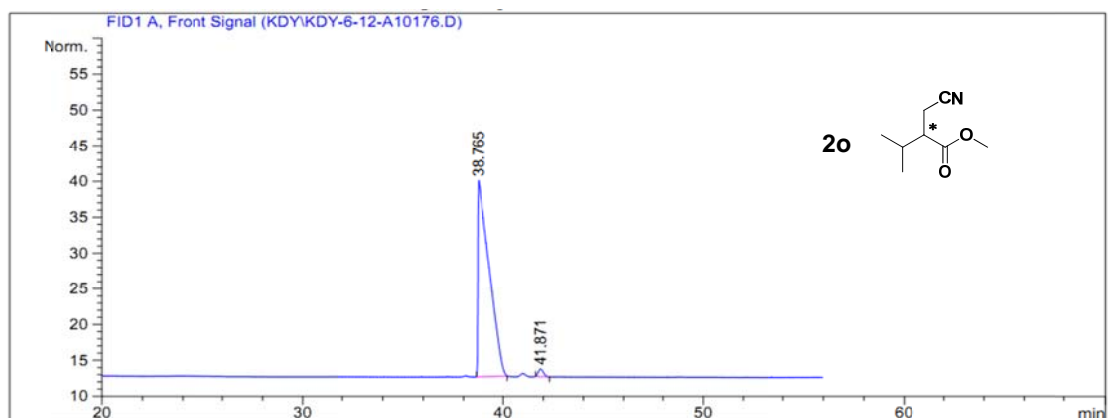

| Peak # | RetTime [min] | Type | Width [min] | Area [pA*s] | Height [pA] | Area %   |
|--------|---------------|------|-------------|-------------|-------------|----------|
| 1      | 38.765        | BB   | 0.4837      | 1099.64038  | 27.43000    | 98.28924 |
| 2      | 41.871        | BB   | 0.2096      | 19.13959    | 1.07764     | 1.71076  |

Totals : 1118.77997 28.50764

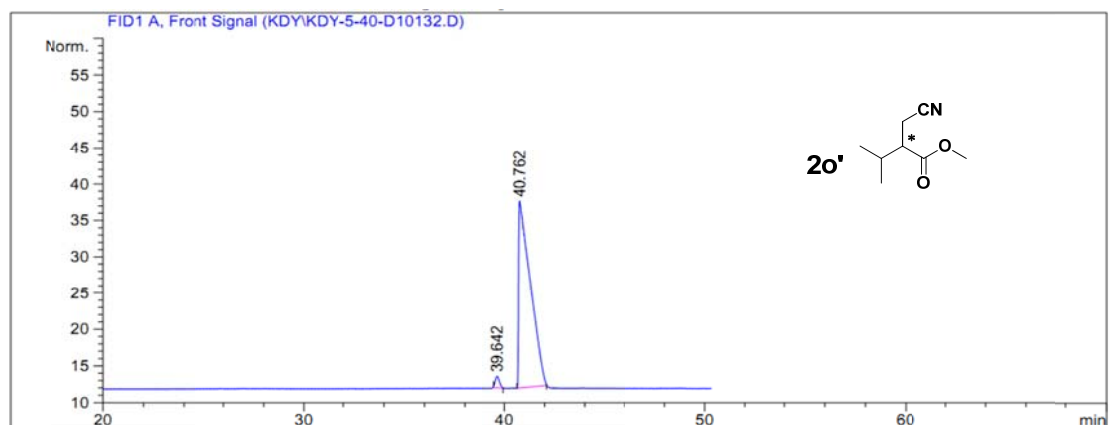

| Peak # | RetTime [min] | Type | Width [min] | Area [pA*s] | Height [pA] | Area %   |
|--------|---------------|------|-------------|-------------|-------------|----------|
| 1      | 39.642        | BB   | 0.1762      | 22.53975    | 1.57064     | 2.13341  |
| 2      | 40.762        | BB   | 0.4876      | 1033.97437  | 25.66373    | 97.86659 |

Totals : 1056.51411 27.23437

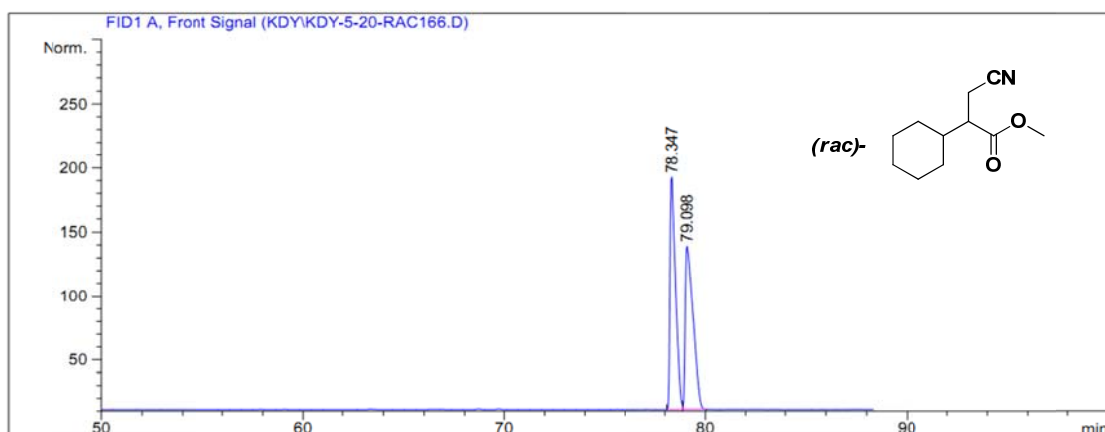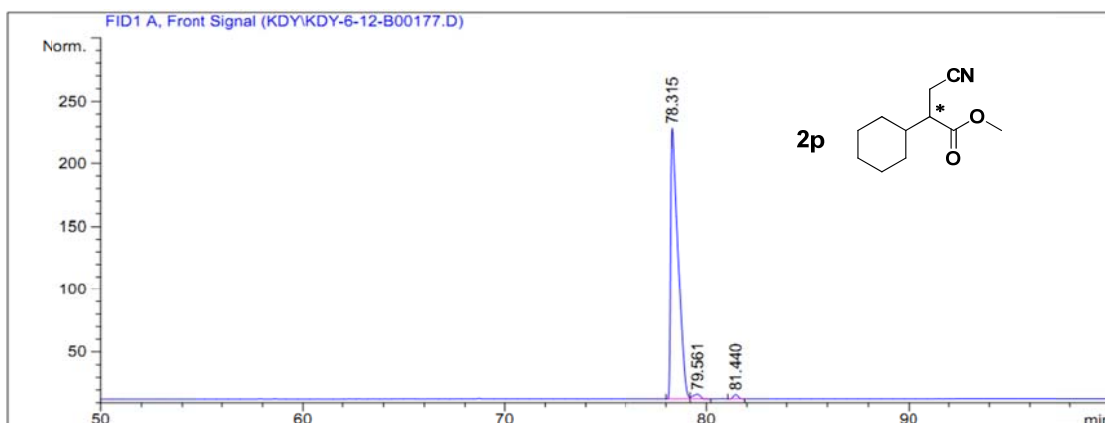

| Peak # | RetTime [min] | Type | Width [min] | Area [pA*s] | Height [pA] | Area %   |
|--------|---------------|------|-------------|-------------|-------------|----------|
| 1      | 78.315        | BV   | 0.3243      | 5452.37500  | 215.85544   | 97.23323 |
| 2      | 79.561        | VB   | 0.3068      | 96.46202    | 3.79746     | 1.72023  |
| 3      | 81.440        | VB   | 0.2037      | 58.68530    | 3.63291     | 1.04655  |

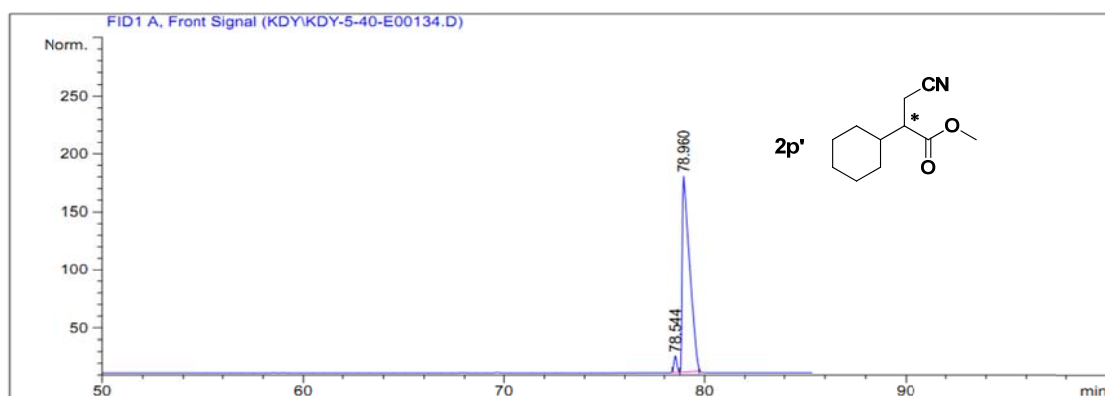

| Peak # | RetTime [min] | Type | Width [min] | Area [pA*s] | Height [pA] | Area %   |
|--------|---------------|------|-------------|-------------|-------------|----------|
| 1      | 78.544        | BV   | 0.1595      | 140.97063   | 13.95383    | 3.19948  |
| 2      | 78.960        | VB   | 0.3266      | 4265.07764  | 167.97549   | 96.80052 |

Totals : 4406.04826 181.92933

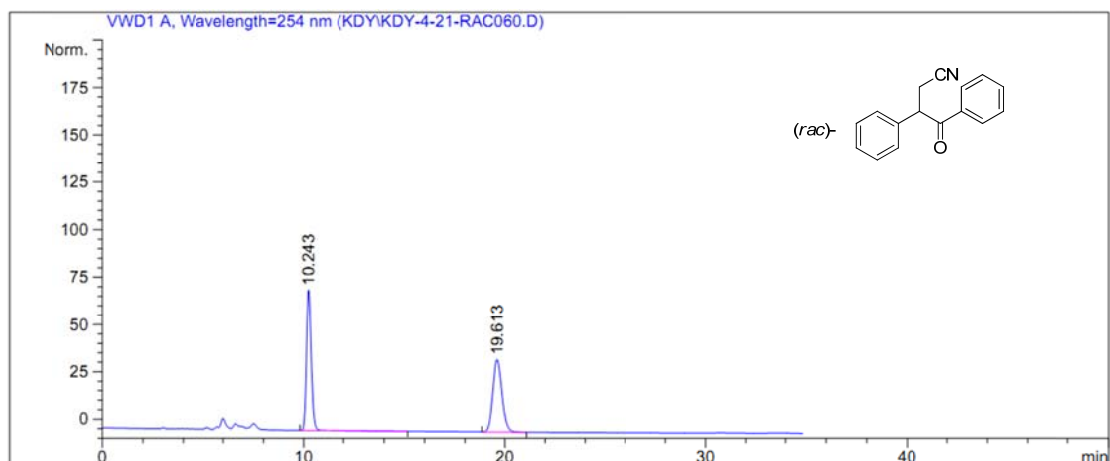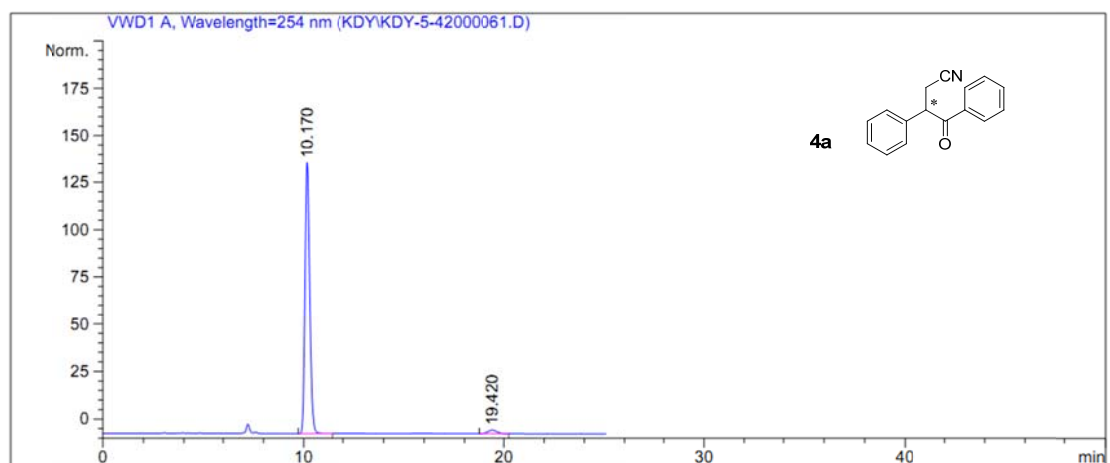

| Peak # | RetTime [min] | Type | Width [min] | Area [mAU*s] | Height [mAU] | Area %  |
|--------|---------------|------|-------------|--------------|--------------|---------|
| 1      | 10.170        | BB   | 0.2499      | 2321.73071   | 143.42116    | 97.5703 |
| 2      | 19.420        | BB   | 0.4623      | 57.81685     | 1.88788      | 2.4297  |

Totals : 2379.54757 145.30904

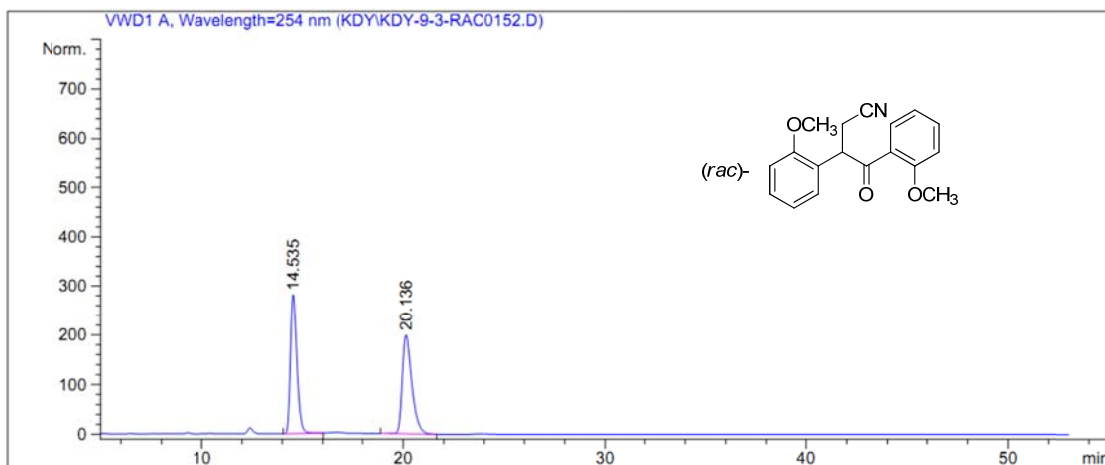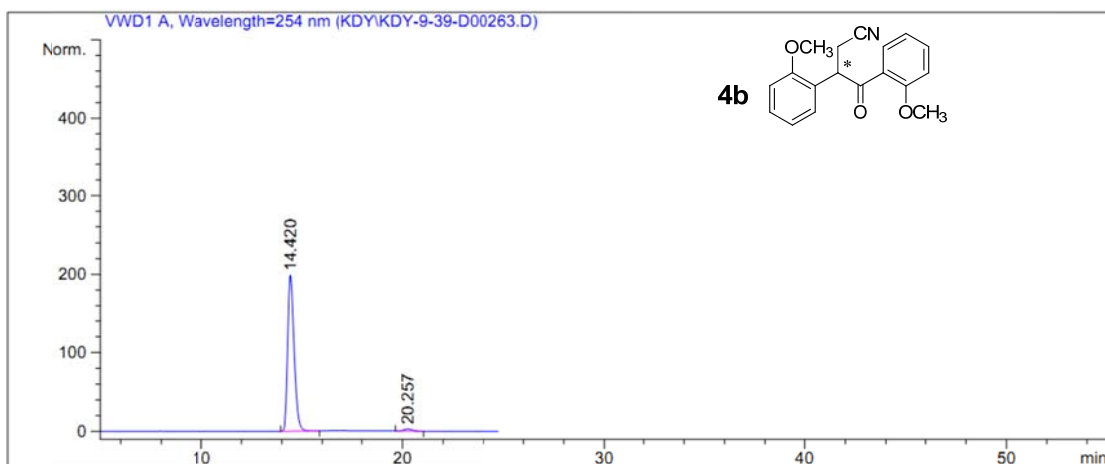

| Peak #   | RetTime [min] | Type | Width [min] | Area [mAU*s] | Height [mAU] | Area %  |
|----------|---------------|------|-------------|--------------|--------------|---------|
| 1        | 14.420        | BB   | 0.3390      | 4380.46484   | 198.85118    | 98.2108 |
| 2        | 20.257        | BB   | 0.4545      | 79.80190     | 2.69495      | 1.7892  |
| Totals : |               |      |             | 4460.26674   | 201.54614    |         |

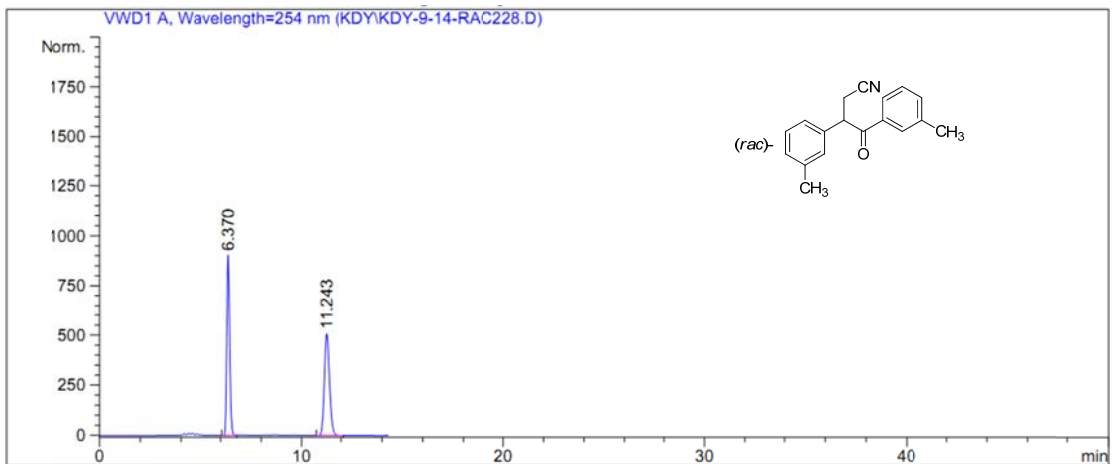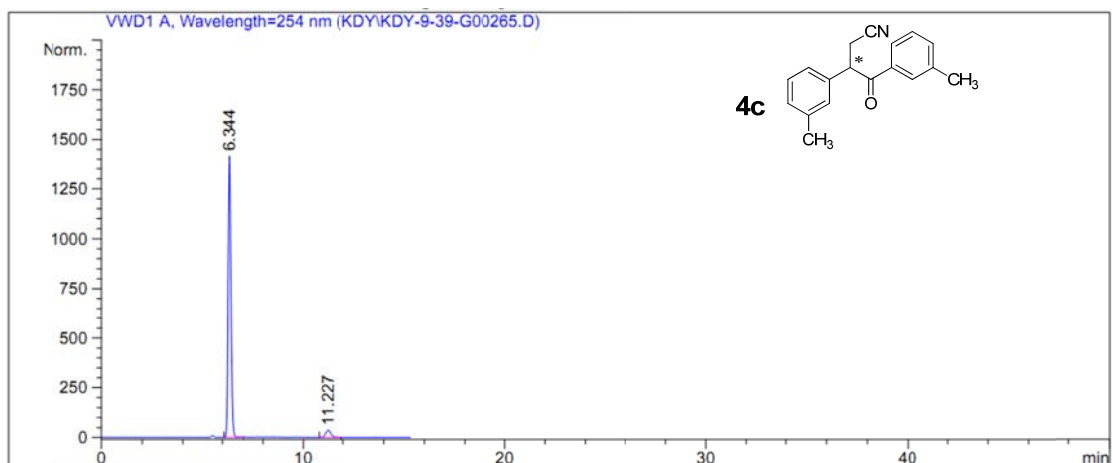

| Peak # | RetTime [min] | Type | Width [min] | Area [mAU*s] | Height [mAU] | Area %  |
|--------|---------------|------|-------------|--------------|--------------|---------|
| 1      | 6.344         | BV   | 0.1483      | 1.36531e4    | 1418.04810   | 95.5451 |
| 2      | 11.227        | BB   | 0.2688      | 636.59882    | 36.62025     | 4.4549  |

Totals : 1.42897e4 1454.66834



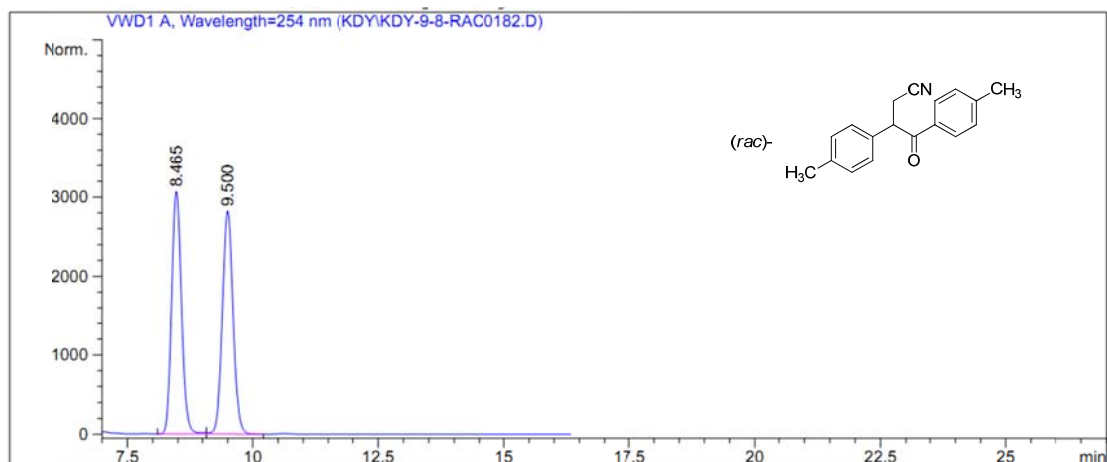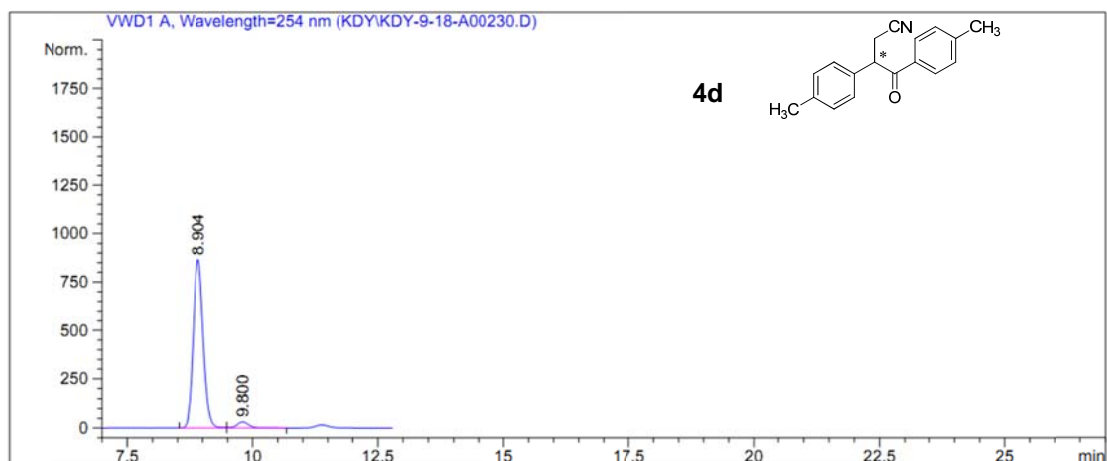

| Peak #   | RetTime [min] | Type | Width [min] | Area [mAU*s] | Height [mAU] | Area %  |
|----------|---------------|------|-------------|--------------|--------------|---------|
| 1        | 8.904         | VV   | 0.2154      | 1.20632e4    | 866.40869    | 95.8829 |
| 2        | 9.800         | VB   | 0.2498      | 517.97742    | 31.50006     | 4.1171  |
| Totals : |               |      |             | 1.25811e4    | 897.90875    |         |

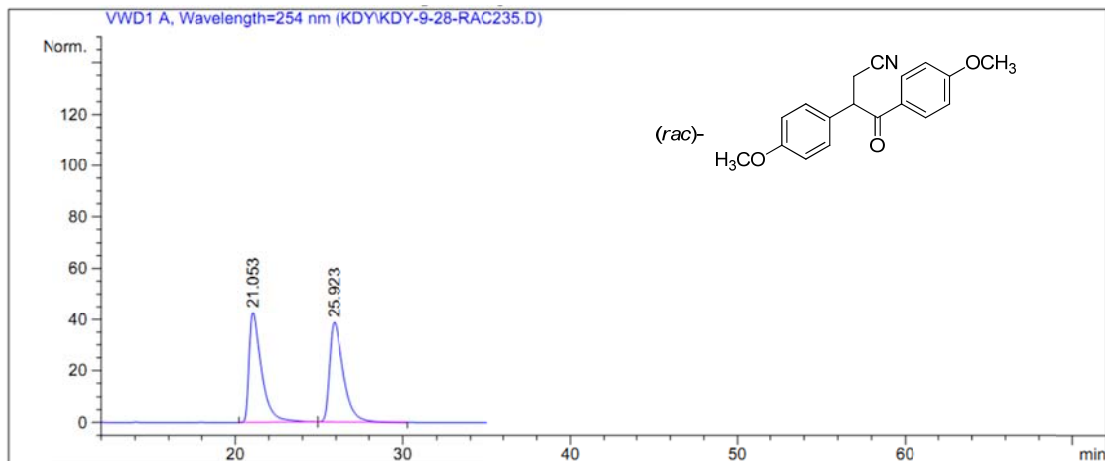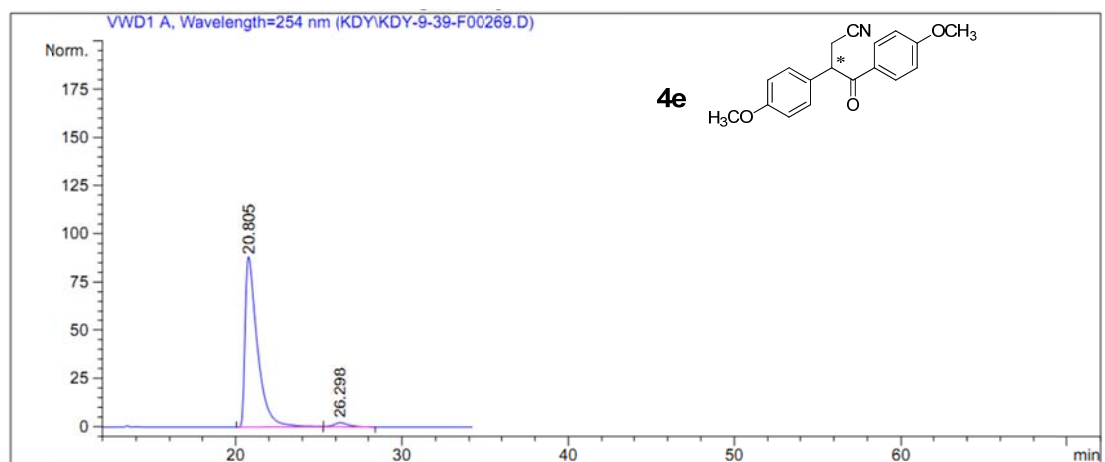

| Peak #   | RetTime [min] | Type | Width [min] | Area [mAU*s] | Height [mAU] | Area %  |
|----------|---------------|------|-------------|--------------|--------------|---------|
| 1        | 20.805        | BB   | 0.7618      | 4498.27637   | 87.20359     | 97.3174 |
| 2        | 26.298        | BB   | 0.9238      | 123.99644    | 2.06733      | 2.6826  |
| Totals : |               |      |             | 4622.27280   | 89.27092     |         |

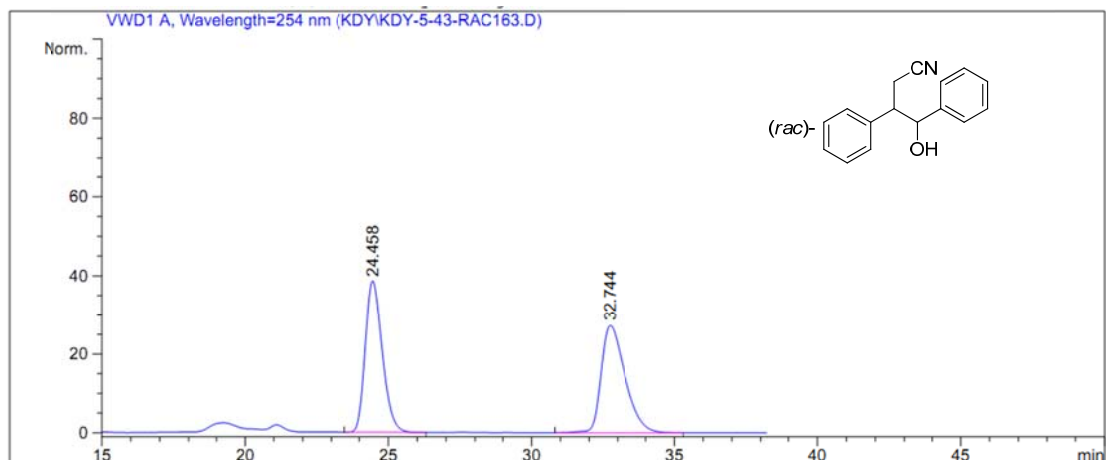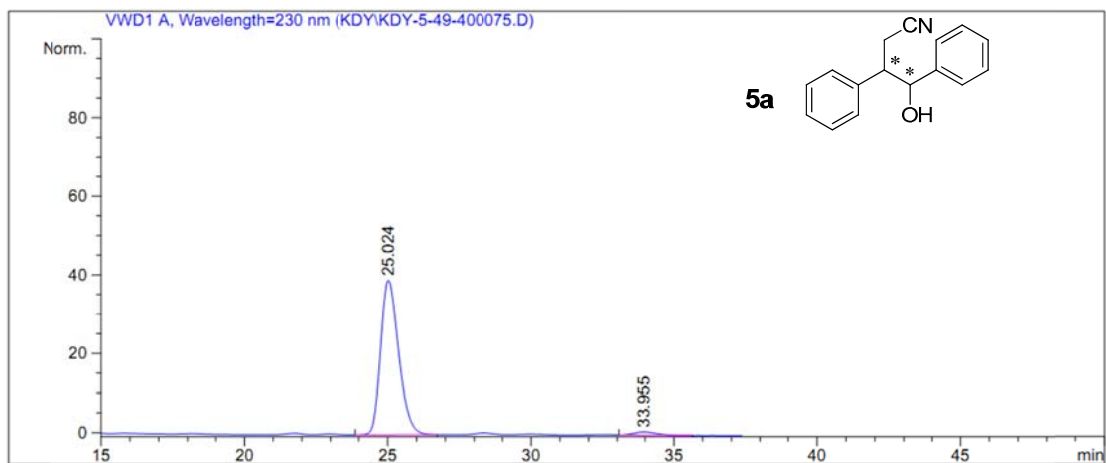

| Peak #   | RetTime [min] | Type | Width [min] | Area [mAU*s] | Height [mAU] | Area %  |
|----------|---------------|------|-------------|--------------|--------------|---------|
| 1        | 25.024        | BV   | 0.6731      | 1698.60938   | 39.08026     | 97.5591 |
| 2        | 33.955        | BB   | 0.6479      | 42.49799     | 7.77201e-1   | 2.4409  |
| Totals : |               |      |             | 1741.10736   | 39.85746     |         |

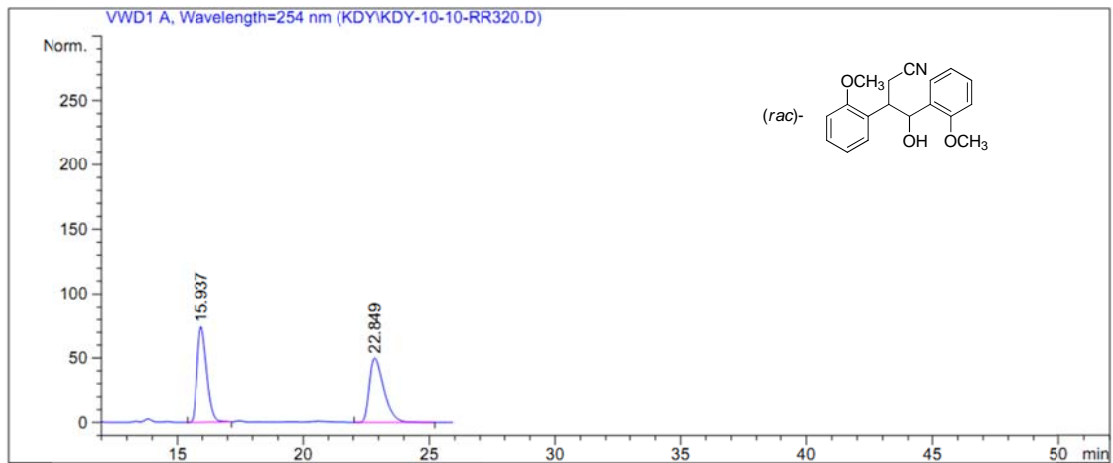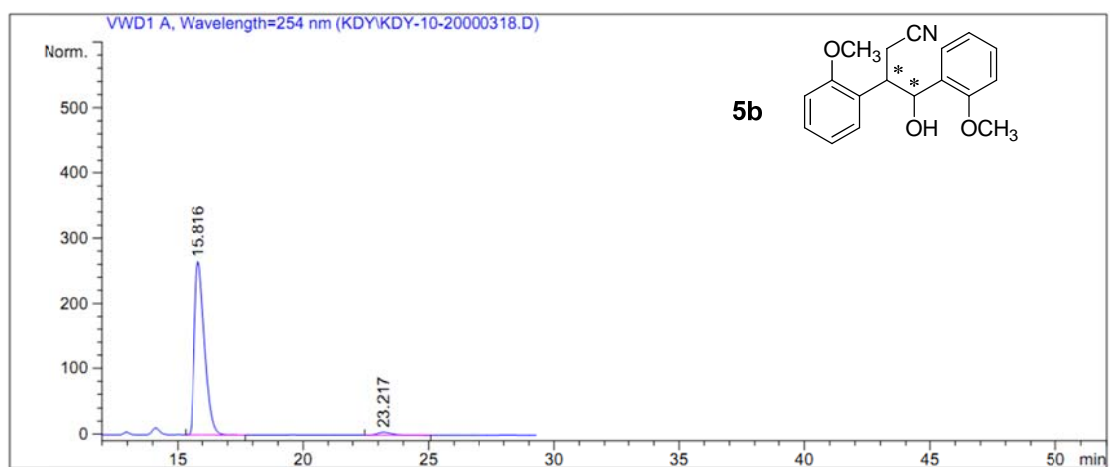

| Peak #   | RetTime [min] | Type | Width [min] | Area [mAU*s] | Height [mAU] | Area %  |
|----------|---------------|------|-------------|--------------|--------------|---------|
| 1        | 15.816        | BB   | 0.4306      | 7464.45410   | 265.00516    | 97.8619 |
| 2        | 23.217        | BB   | 0.5793      | 163.08755    | 4.19751      | 2.1381  |
| Totals : |               |      |             | 7627.54166   | 269.20266    |         |

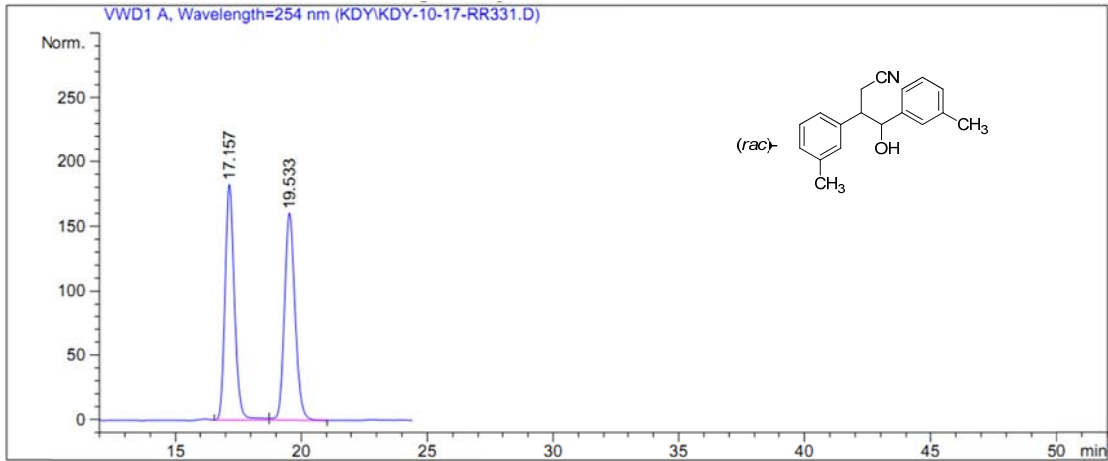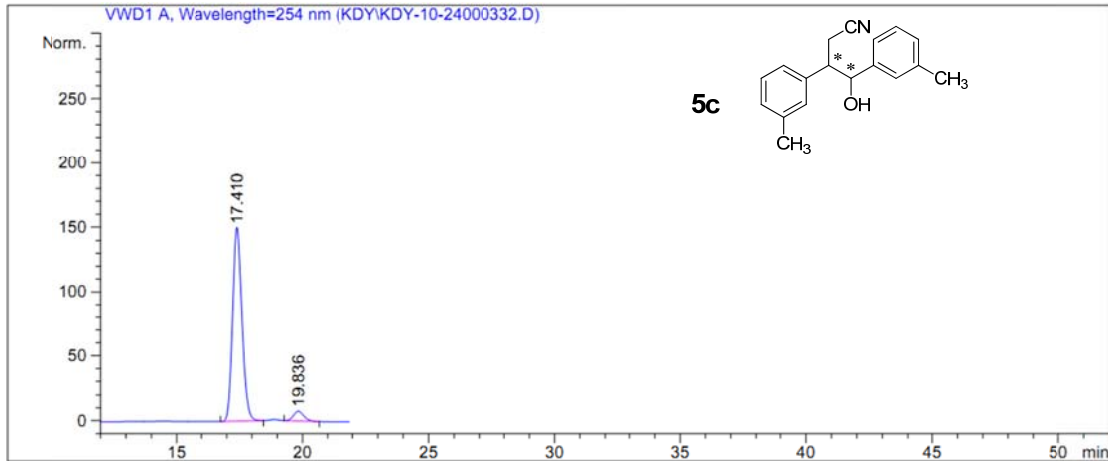

| Peak #   | RetTime [min] | Type | Width [min] | Area [mAU*s] | Height [mAU] | Area %  |
|----------|---------------|------|-------------|--------------|--------------|---------|
| 1        | 17.410        | BB   | 0.4144      | 3870.70020   | 149.33983    | 94.7531 |
| 2        | 19.836        | BBA  | 0.4613      | 214.33755    | 7.50307      | 5.2469  |
| Totals : |               |      |             | 4085.03775   | 156.84290    |         |

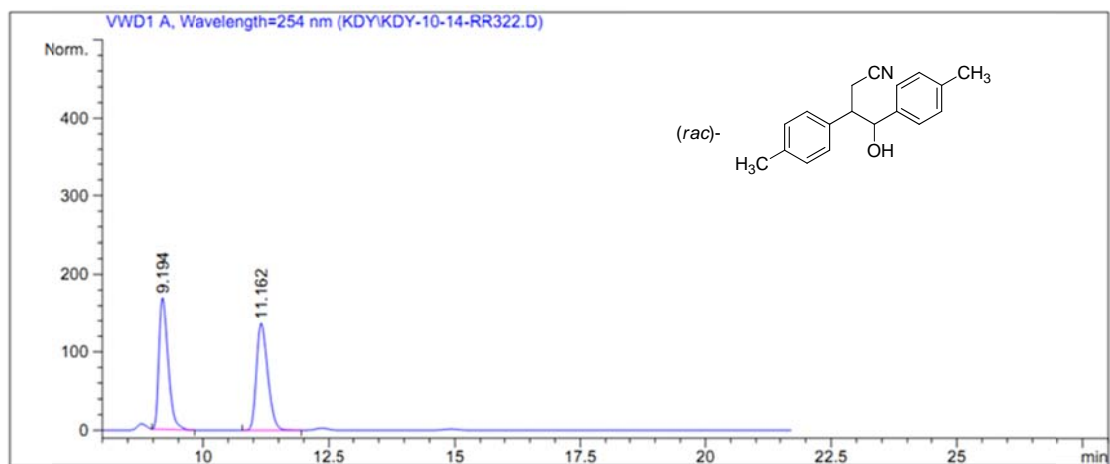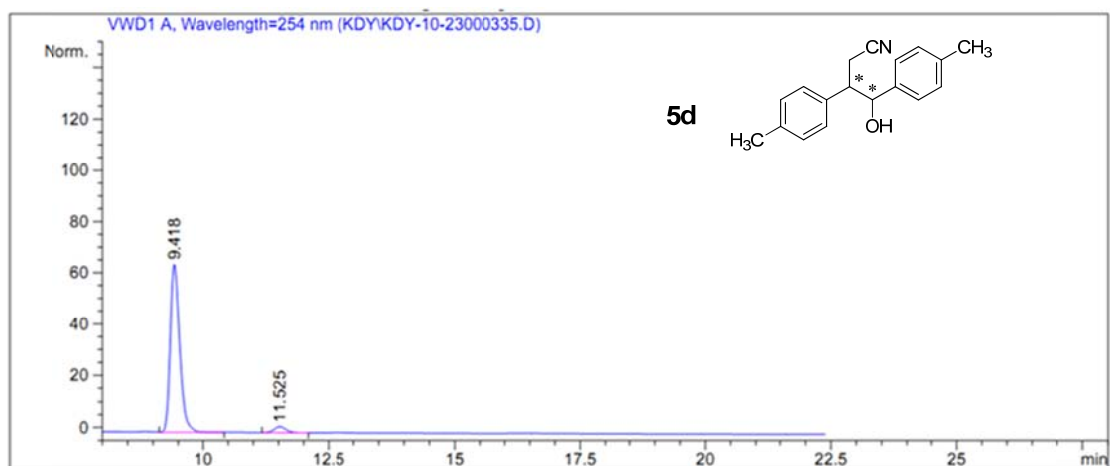

| Peak # | RetTime [min] | Type | Width [min] | Area [mAU*s] | Height [mAU] | Area %  |
|--------|---------------|------|-------------|--------------|--------------|---------|
| 1      | 9.418         | BB   | 0.1980      | 842.00226    | 65.05693     | 95.7846 |
| 2      | 11.525        | BB   | 0.2512      | 37.05603     | 2.28509      | 4.2154  |

Totals : 879.05829 67.34202

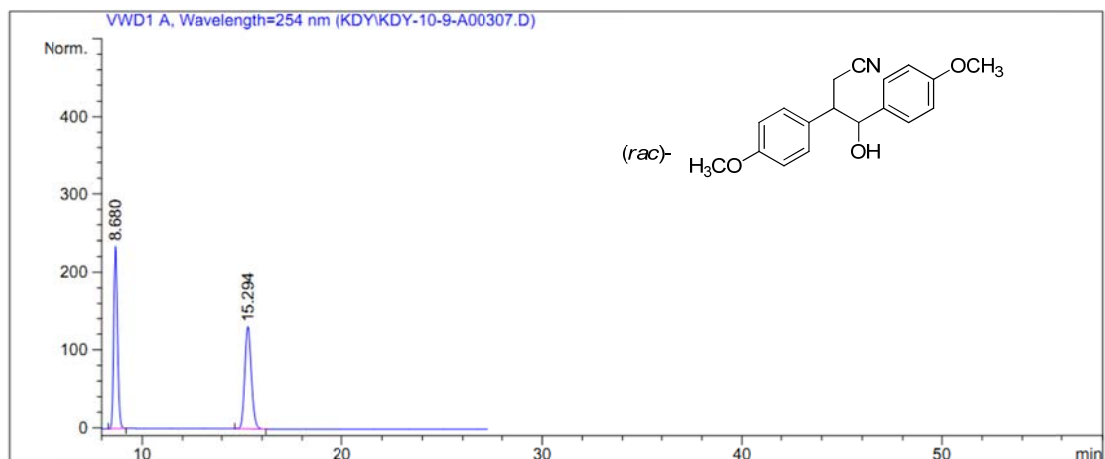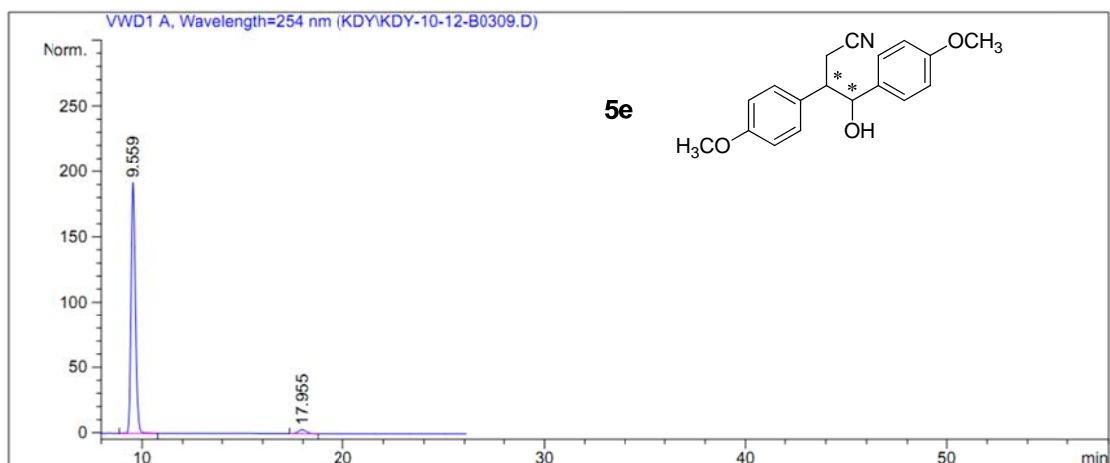

| Peak #   | RetTime [min] | Type | Width [min] | Area [mAU*s] | Height [mAU] | Area %  |
|----------|---------------|------|-------------|--------------|--------------|---------|
| 1        | 9.559         | BB   | 0.2254      | 2804.29175   | 192.05591    | 97.0839 |
| 2        | 17.955        | BB   | 0.4213      | 84.23180     | 3.03948      | 2.9161  |
| Totals : |               |      |             | 2888.52354   | 195.09539    |         |

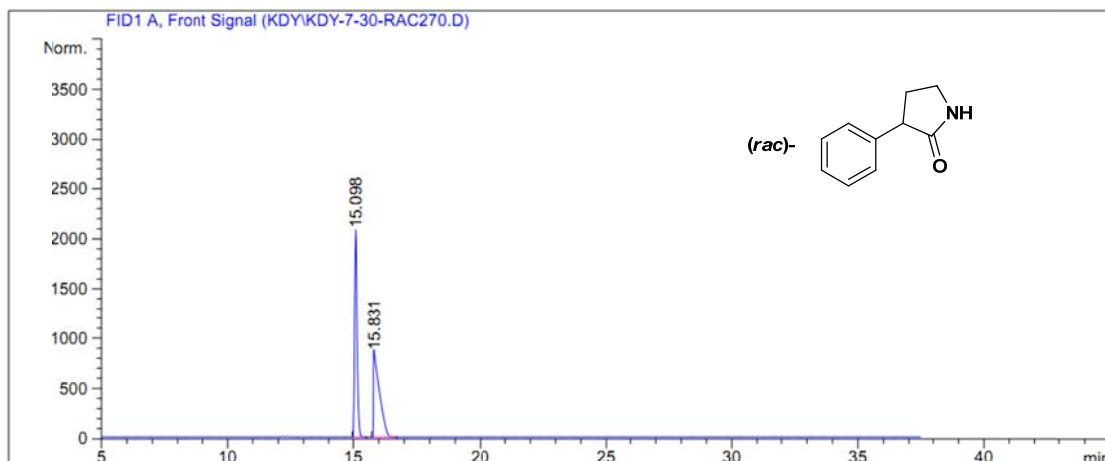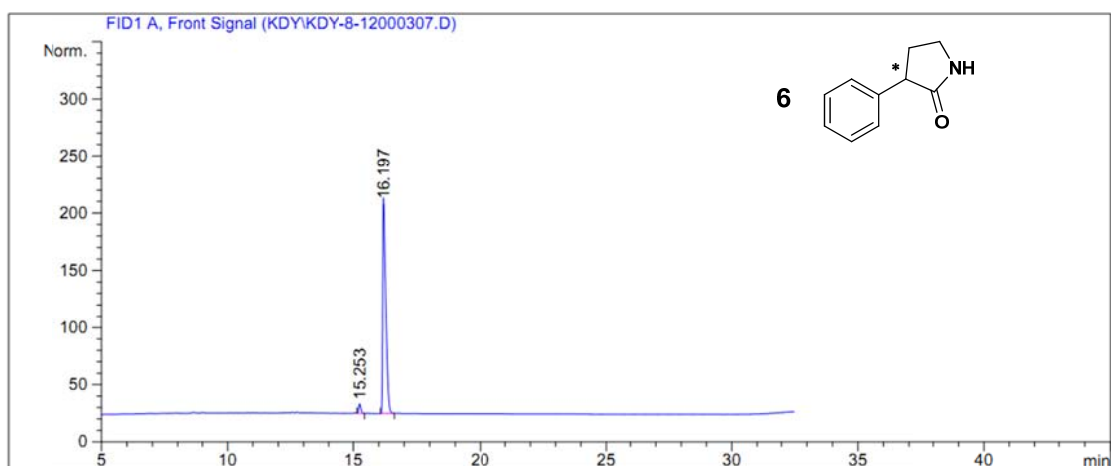

| Peak #   | RetTime [min] | Type | Width [min] | Area [pA*s] | Height [pA] | Area %   |
|----------|---------------|------|-------------|-------------|-------------|----------|
| 1        | 15.253        | BB   | 0.0940      | 48.78241    | 8.31724     | 3.02409  |
| 2        | 16.197        | BB   | 0.1285      | 1564.34644  | 183.06644   | 96.97591 |
| Totals : |               |      |             | 1613.12884  | 191.38368   |          |



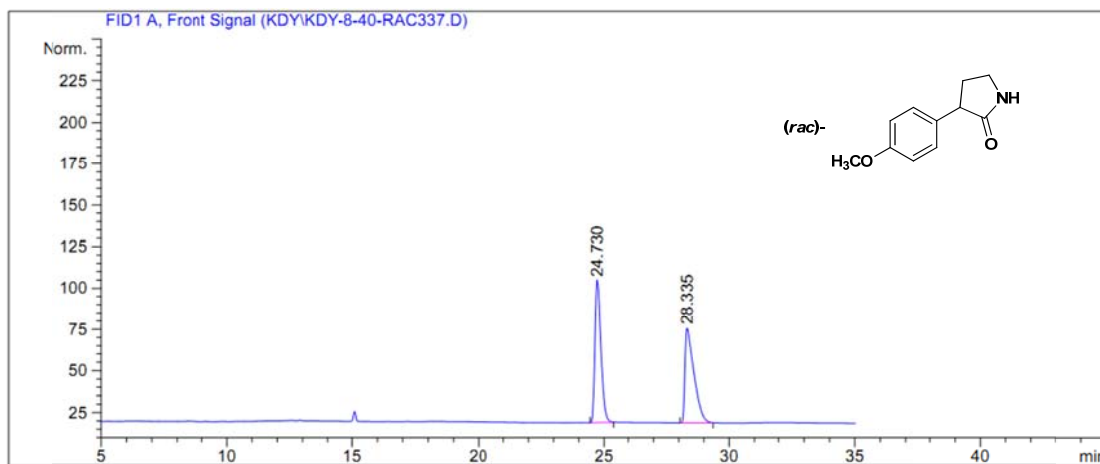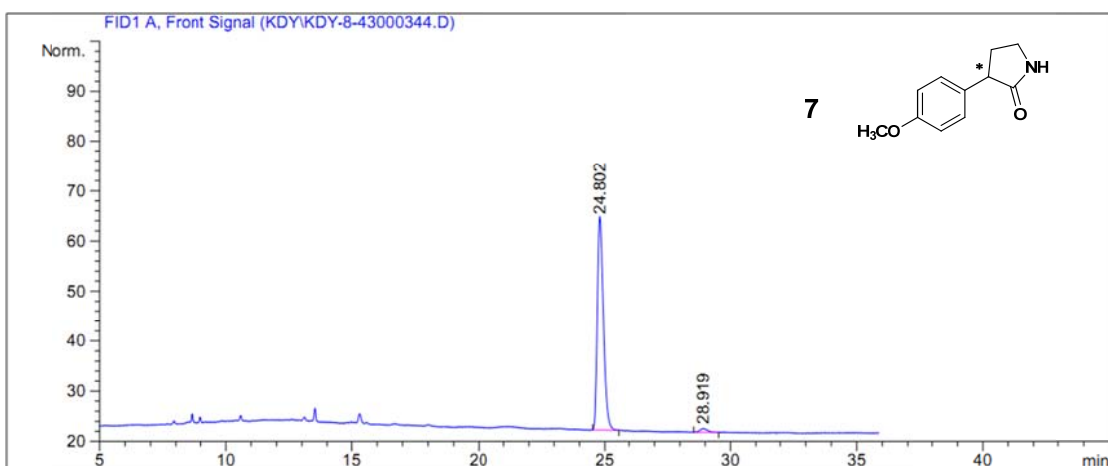

| Peak #   | RetTime [min] | Type | Width [min] | Area [pA*s] | Height [pA] | Area %   |
|----------|---------------|------|-------------|-------------|-------------|----------|
| 1        | 24.802        | BB   | 0.2564      | 708.02380   | 42.22035    | 98.04952 |
| 2        | 28.919        | BB   | 0.3092      | 14.08457    | 6.97533e-1  | 1.95048  |
| Totals : |               |      |             | 722.10837   | 42.91789    |          |

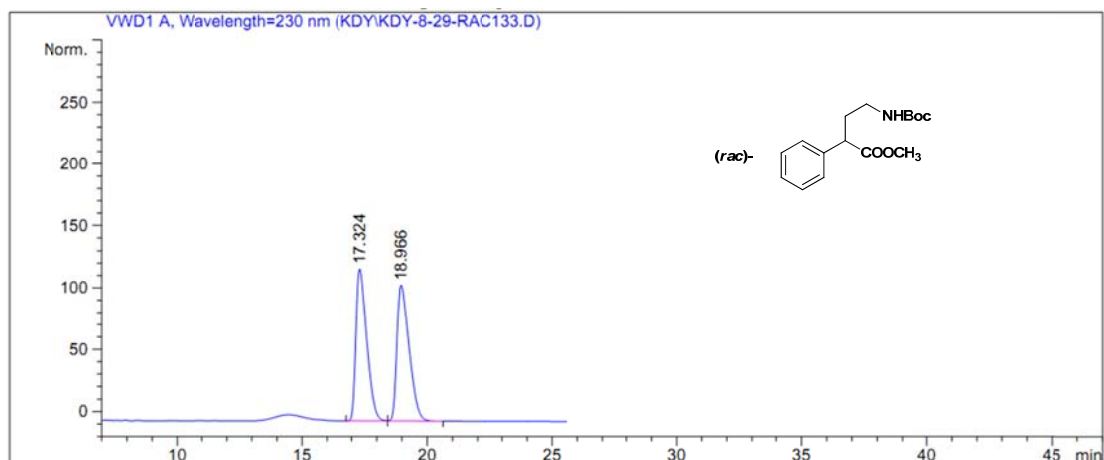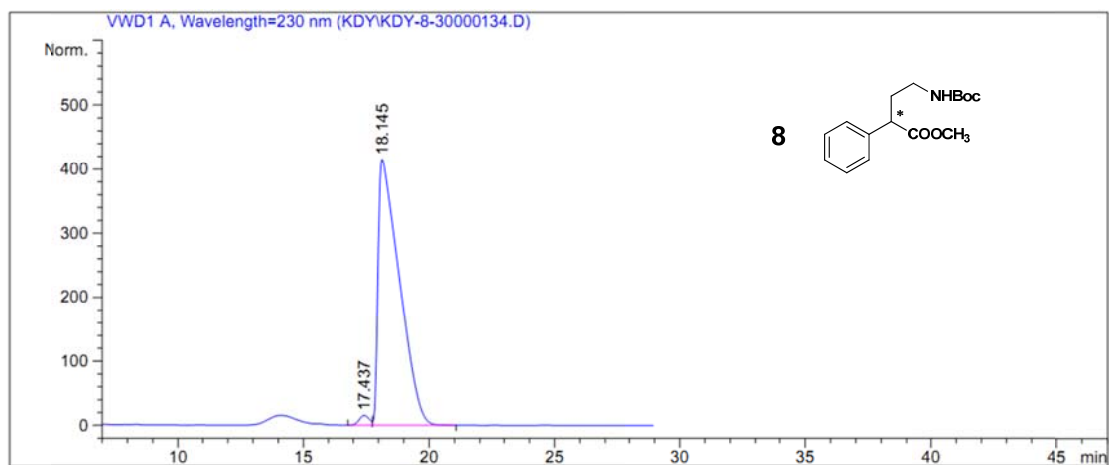

| Peak #   | RetTime [min] | Type | Width [min] | Area [mAU*s] | Height [mAU] | Area %  |
|----------|---------------|------|-------------|--------------|--------------|---------|
| 1        | 17.437        | BV   | 0.4393      | 421.31314    | 15.25087     | 1.7136  |
| 2        | 18.145        | VB   | 0.8621      | 2.41646e4    | 415.11633    | 98.2864 |
| Totals : |               |      |             | 2.45859e4    | 430.36721    |         |

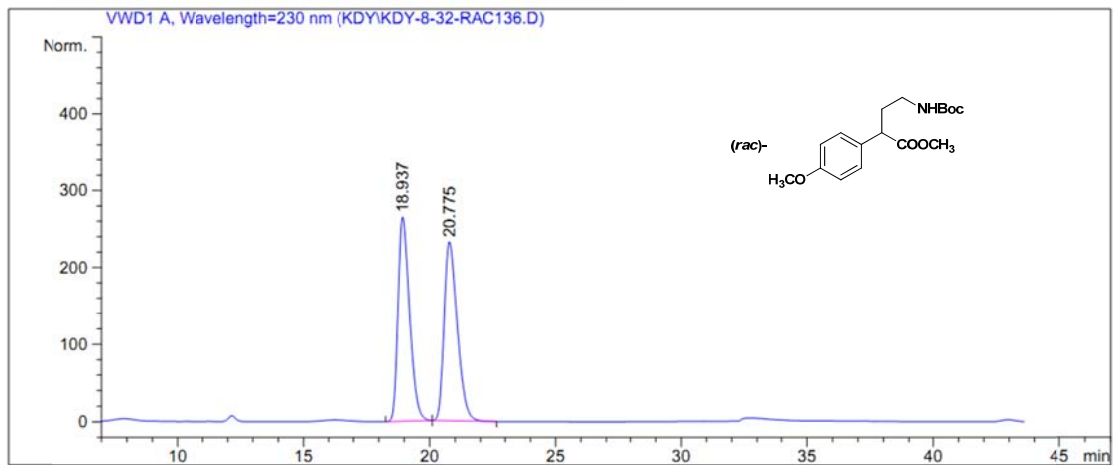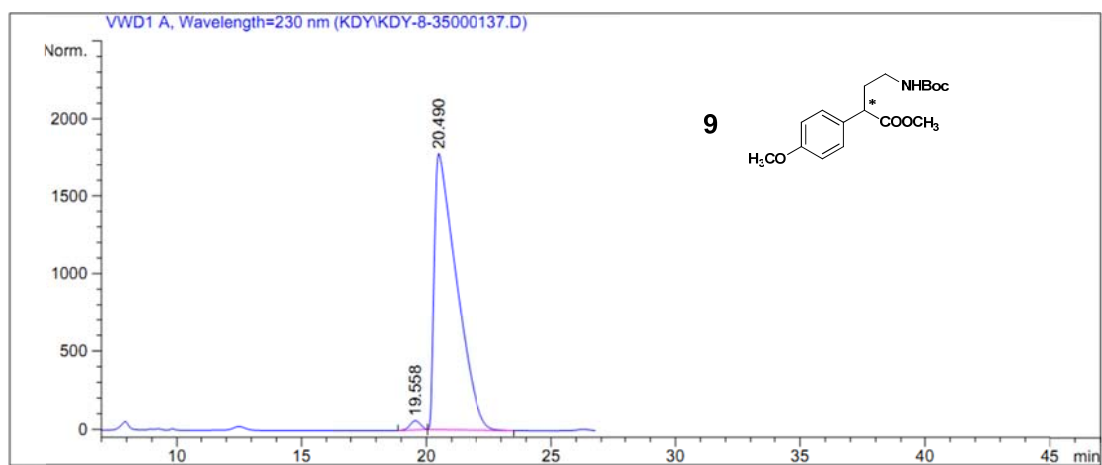

| Peak #   | RetTime [min] | Type | Width [min] | Area [mAU*s] | Height [mAU] | Area %  |
|----------|---------------|------|-------------|--------------|--------------|---------|
| 1        | 19.558        | BB   | 0.4558      | 1680.73022   | 58.56921     | 1.5170  |
| 2        | 20.490        | BB   | 0.9350      | 1.09111e5    | 1777.79150   | 98.4830 |
| Totals : |               |      |             | 1.10792e5    | 1836.36071   |         |
